# Supplementary material for: Protocol for the PreventIT feasibility randomised controlled trial of a lifestyle-integrated exercise intervention in young older adults
Source: PubMed Central journal article supplement — BMJ Open. 2019 Mar 20;9(3):e023526. doi: 10.1136/bmjopen-2018-023526 (PMC6527989; doi:10.1136/bmjopen-2018-023526), 2019-03-20
Supplement: bmjopen-2018-023526.draft_revisions.pdf [file bmjopen-2018-023526.draft_revisions.pdf]

# BMJ Open

BMJ Open is committed to open peer review. As part of this commitment we make the peer review history of every article we publish publicly available.

When an article is published we post the peer reviewers' comments and the authors' responses online. We also post the versions of the paper that were used during peer review. These are the versions that the peer review comments apply to.

The versions of the paper that follow are the versions that were submitted during the peer review process. They are not the versions of record or the final published versions. They should not be cited or distributed as the published version of this manuscript.

BMJ Open is an open access journal and the full, final, typeset and author-corrected version of record of the manuscript is available on our site with no access controls, subscription charges or pay-per-view fees (<http://bmjopen.bmj.com>).

If you have any questions on BMJ Open's open peer review process please email [info.bmjopen@bmj.com](mailto:info.bmjopen@bmj.com)

# BMJ Open

## Protocol for the PreventIT randomised controlled trial feasibility study of a lifestyle-integrated exercise intervention in young older adults

|                               |                                                                                                                                                                                                                                                                                                                                                                                                                                                                                                                                                                                                                                                                                                                                                                                                                                                                                                                                                                                                                                                                                                                                                                                                                                                                                                                                                                                                                                                                                                                                                                                                                                                                                                                                                                                                                                                                                                                                                                                                                                                                                  |
|-------------------------------|----------------------------------------------------------------------------------------------------------------------------------------------------------------------------------------------------------------------------------------------------------------------------------------------------------------------------------------------------------------------------------------------------------------------------------------------------------------------------------------------------------------------------------------------------------------------------------------------------------------------------------------------------------------------------------------------------------------------------------------------------------------------------------------------------------------------------------------------------------------------------------------------------------------------------------------------------------------------------------------------------------------------------------------------------------------------------------------------------------------------------------------------------------------------------------------------------------------------------------------------------------------------------------------------------------------------------------------------------------------------------------------------------------------------------------------------------------------------------------------------------------------------------------------------------------------------------------------------------------------------------------------------------------------------------------------------------------------------------------------------------------------------------------------------------------------------------------------------------------------------------------------------------------------------------------------------------------------------------------------------------------------------------------------------------------------------------------|
| Journal:                      | <i>BMJ Open</i>                                                                                                                                                                                                                                                                                                                                                                                                                                                                                                                                                                                                                                                                                                                                                                                                                                                                                                                                                                                                                                                                                                                                                                                                                                                                                                                                                                                                                                                                                                                                                                                                                                                                                                                                                                                                                                                                                                                                                                                                                                                                  |
| Manuscript ID                 | bmjopen-2018-023526                                                                                                                                                                                                                                                                                                                                                                                                                                                                                                                                                                                                                                                                                                                                                                                                                                                                                                                                                                                                                                                                                                                                                                                                                                                                                                                                                                                                                                                                                                                                                                                                                                                                                                                                                                                                                                                                                                                                                                                                                                                              |
| Article Type:                 | Protocol                                                                                                                                                                                                                                                                                                                                                                                                                                                                                                                                                                                                                                                                                                                                                                                                                                                                                                                                                                                                                                                                                                                                                                                                                                                                                                                                                                                                                                                                                                                                                                                                                                                                                                                                                                                                                                                                                                                                                                                                                                                                         |
| Date Submitted by the Author: | 11-Apr-2018                                                                                                                                                                                                                                                                                                                                                                                                                                                                                                                                                                                                                                                                                                                                                                                                                                                                                                                                                                                                                                                                                                                                                                                                                                                                                                                                                                                                                                                                                                                                                                                                                                                                                                                                                                                                                                                                                                                                                                                                                                                                      |
| Complete List of Authors:     | <p>Taraldsen, Kristin; Norwegian University of Science and Technology (NTNU), Department of Neuromedicine and Movement Science<br/> Mikolaizak, A. Stefanie; Robert Bosch Krankenhaus<br/> Maier, Andrea; Vrije Universiteit Amsterdam, Department of Human Movement Sciences<br/> Boulton, Elisabeth; University of Manchester, School of Health Sciences; Manchester Academic Health Science Centre<br/> Aminian, Kamiar; Ecole Polytechnique Federale de Lausanne<br/> van Ancum, Jeanine; Vrije Universiteit Amsterdam, Department of Human Movement Sciences<br/> Bandinelli, Stefania; Local Health Unit Toscana Center<br/> Becker, Clemens; RobertBoschKrankenhaus, Geriatric Medicine<br/> Bergquist, Ronny; Norwegian University of Science and Technology (NTNU), Department of Neuromedicine and Movement Science<br/> Chiari, Lorenzo; University of Bologna, Department of Electrical, Electronic and Information Engineering «Guglielmo Marconi»<br/> Clemson, Lindy; University of Sydney, Faculty of Health Sciences<br/> French, David; University of Manchester, School of Psychological Sciences<br/> Gannon, B; The University of Queensland, Centre for Business and Economics of Health<br/> Hawley-Hague, Helen; University of Manchester, School of Health Sciences<br/> Jonkman, Nini ; Vrije Universiteit Amsterdam, Department of Human Movement Sciences<br/> Mellone, Sabato; University of Bologna, Department of Electrical, Electronic and Information Engineering «Guglielmo Marconi»<br/> Paraschiv-Ionescu, Anisoara; Ecole Polytechnique Federale de Lausanne<br/> Pijnappels, Mirjam; Vrije Universiteit Amsterdam, Department of Human Movement Sciences<br/> Schwenk, Michael; Robert-Bosch Krankenhaus<br/> Todd, Chris; University of Manchester, School of Health Sciences<br/> Yang, Fan; University of York, Centre for Health Economics<br/> Zacchi, Anna; Doxee S.p.A<br/> Helbostad, Jorunn<br/> Vereijken, Beatrix; Norwegian University of Science and Technology (NTNU), Department of Neuromedicine and Movement Science</p> |
| Keywords:                     | physical activity, muscle strength, balance, mobile health units, functional                                                                                                                                                                                                                                                                                                                                                                                                                                                                                                                                                                                                                                                                                                                                                                                                                                                                                                                                                                                                                                                                                                                                                                                                                                                                                                                                                                                                                                                                                                                                                                                                                                                                                                                                                                                                                                                                                                                                                                                                     |

1  
2  
3  
4  
5  
6  
7  
8  
9  
10  
11  
12  
13  
14  
15  
16  
17  
18  
19  
20  
21  
22  
23  
24  
25  
26  
27  
28  
29  
30  
31  
32  
33  
34  
35  
36  
37  
38  
39  
40  
41  
42  
43  
44  
45  
46  
47  
48  
49  
50  
51  
52  
53  
54  
55  
56  
57  
58  
59  
60

|  |                           |
|--|---------------------------|
|  | decline, behaviour change |
|  |                           |

SCHOLARONE™  
Manuscripts

**Title:** Protocol for the PreventIT randomised controlled trial feasibility study of a lifestyle-integrated exercise intervention in young older adults

**Authors:** Kristin Taraldsen<sup>1\*</sup>, A. Stefanie Mikolaizak<sup>2\*</sup>, Andrea B. Maier<sup>3\*</sup>

\* Shared first authorship

**Elisabeth Boulton<sup>4</sup>; Kamiar Aminian<sup>5</sup>; Jeanine van Ancum<sup>3</sup>; Stefania Bandinelli<sup>6</sup>; Clemens Becker<sup>2</sup>; Ronny Bergquist<sup>1</sup>; Lorenzo Chiari<sup>7</sup>; Lindy Clemson<sup>8</sup>; David P. French<sup>4</sup>; Brenda Gannon<sup>9</sup>; Helen Hawley-Hague<sup>4</sup>; Nini H. Jonkman<sup>3</sup>; Sabato Mellone<sup>7</sup>; Anisoara Paraschiv-Ionescu<sup>5</sup>; Mirjam Pijnappels<sup>3</sup>; Michael Schwenk<sup>2</sup>; Chris Todd<sup>4</sup>; Fan Yang<sup>10</sup>; Anna Zacchi<sup>11</sup>; Jorunn L Helbostad<sup>1</sup>; Beatrix Vereijken<sup>1</sup>**

**Affiliations:**

<sup>1</sup>Department of Neuromedicine and Movement Science, The Faculty of Medicine and Health Sciences, The Norwegian University of Science and Technology, NTNU, Trondheim, Norway;

<sup>2</sup>Robert Bosch Krankenhaus, Department of Clinical Gerontology and Robert Bosch Medical Foundation, Stuttgart, Germany;

<sup>3</sup>Department of Human Movement Sciences, Faculty of Behavioural and Movement Sciences, Vrije Universiteit Amsterdam, Amsterdam Movement Sciences, The Netherlands;

<sup>4</sup>School of Health Sciences, Faculty of Biology, Medicine and Health, University of Manchester, Manchester UK and Manchester Academic Health Science Centre, and Manchester University NHS Foundation Trust, Manchester, UK;

<sup>5</sup>Laboratory of Movement Analysis and Measurement, Ecole Polytechnique Federale de Lausanne, Lausanne, Switzerland;

<sup>6</sup>Local Health Unit Toscana Center, Florence, Italy;

<sup>7</sup>Department of Electrical, Electronic and Information Engineering «Guglielmo Marconi» - University of Bologna, Bologna, Italy;

<sup>8</sup>The University of Sydney, Faculty of Health Sciences, Lidcombe, New South Wales, Australia

<sup>9</sup>Centre for Business and Economics of Health, University of Queensland, Australia;

<sup>10</sup>Centre for Health Economics, University of York, York, UK;

<sup>11</sup>Doxee S.p.A., Italy;

**Corresponding author:**

Kristin Taraldsen,

Department of Neuromedicine and Movement Science

Norwegian University of Science and Technology (NTNU)

Postal address:

Department of Neuromedicine and Movement Science,

NTNU, Faculty of Medicine and Health Sciences,

N-7491 Trondheim, Norway

E-mail: [Kristin.Taraldsen@ntnu.no](mailto:Kristin.Taraldsen@ntnu.no)

Telephone: +47 93 63 32 52

**Keywords:** Physical activity, muscle strength, balance, mobile health units, functional decline, behaviour change

**Word count, excluding title page, abstract, references, figures and tables: 5575**

## Abstract

**Introduction:** The European population is rapidly ageing. In order to handle substantial future challenges in the health care system, we need to shift focus from treatment towards health promotion. The PreventIT project has adapted the lifestyle-integrated exercise programme (LiFE) and developed an intervention for healthy young older adults at risk of accelerated functional decline. The intervention targets balance, muscle strength and physical activity, and is delivered either via a smartphone application (eLiFE) or by use of paper manuals (aLiFE).

**Methods and analysis:** The PreventIT study is a multicentre, three-armed feasibility RCT, comparing eLiFE and aLiFE against a control group that receives international guidelines of physical activity, it is performed in three European cities in Norway, Germany, and The Netherlands. The primary objective is to assess the feasibility and usability of the interventions, and to assess changes in daily life function as measured by the Late-Life Function and Disability Instrument (LLFDI) scale and a physical behaviour complexity metric. Participants are assessed at baseline, after the six months intervention period, and at one year post-randomisation. Men and women between 61-70 years of age were randomly drawn from regional registries and respondents screened for risk of functional decline to recruit and randomise 180 participants (60 participants per study arm).

**Ethics and dissemination:** Ethical approval was received at all three trial sites. Baseline results are intended to be published by late 2018, with final study findings expected early 2019. Subgroup and further indepth analyse will subsequently be published.

**Discussion:** Results will be used to improve lifestyle integrated activities targeting balance, muscle strength and physical activity for young older adults, to compare technological advances with traditional delivery of such an intervention, and to design a future definitive phase III RCT.

**Trial registration:** ClinicalTrials.gov, NCT03065088. Registered on 14 February 2017.

**Strengths and limitations of this study:**

- aLiFE integrates individualised and appropriately challenging balance, muscle strength, and physical activities into daily lives of young older adults.
- eLiFE uses a smartphone/smartwatch app to offer a personalised life-style integrated activity programme, based on a risk screening of future functional decline and an individuals' physical performance.
- Technology-supported exercise programme allows participants to monitor their behaviour and receive messages and feedback in real time aiming to change their physical behaviour.
- The twelve month follow-up enables monitoring and evaluation of long-term adherence to smartphone-based and paper-based interventions.
- Potential sources of bias include the selection of participants and loss to follow-up if those who complete the full data collection protocol are systematically different between the three groups.

## BACKGROUND

The European population is rapidly ageing. Average life expectancy has exceeded 80 years across Organisation for Economic Co-operation and Development (OECD) countries (1), with a concomitant increase in projected years spent with disabilities (2). In order to tackle future challenges on already overstretched health care systems, it is generally recognised that there needs to be shift of focus from treatment towards promoting active and healthy ageing and prevention of age-related diseases and functional decline (3).

It is well documented that physical activity improves health and physical function and reduces disability at old age (4). Increasing physical activity (4) as well as balance (5) and strength (5) training have been described as determinants for maintaining function and ability. According to the World Health Organisation (WHO), physical inactivity is the fourth leading risk factor contributing to death worldwide and increases the risk of adverse health outcomes, such as shortened life expectancy, cardiovascular disease, diabetes, and cancer (6). Older adults are at increased risk of physical inactivity, with significant decline in activity levels occurring around the time of retirement (7). Simultaneously, this period of life provides the opportunity to adopt a healthy and active lifestyle, as there is still potential to prevent decline and maintain physical function required to remain active and independent in later life (8).

In order to shift from an inactive to an active lifestyle, behaviour change is needed. However, uptake of and adherence to physical activity interventions is a challenge, as shown for example in fall prevention (9) and evidence-based strength and balance programmes in older adults (10). Previous studies demonstrated that high intervention adherence rates can achieve statistically significant and clinically relevant treatment effects (11). However, participants' activity levels often revert back to previous low activity levels at the end of the intervention period (12, 13), indicating that interventions must be supported by behavioural change, be acceptable, and be based on theoretical and empirically tested principles (12, 14, 15).

The PreventIT project (Early risk detection and prevention in ageing people by self-administered ICT-supported assessment and a behavioural change intervention, delivered by use of smartphones and smartwatches), is a European Horizon 2020 ICT and personal health project. The aim is to develop and test a personalised behaviour change intervention on physical activity aimed at young older adults that has the potential to prevent accelerated functional decline at older age (16).



PreventIT is based on the **LiFE programme** (Lifestyle-integrated Exercise programme) developed by Clemson et al. (17). In LiFE, balance and muscle strengthening activities are embedded within everyday activities. Rather than using a prescribed set of exercises, LiFE activities occur whenever the opportunity for such activity arises during the day. The original LiFE programme was developed for adults 70 years and older and tested in older home-dwelling people. It was found to significantly reduce falls, improve physical function, decrease disability and improve adherence, compared to a traditional exercise programme and a sham intervention (18). Thus, tailoring exercise at an individual level and integrating it in daily life seems to be a promising approach.

In accordance with the UK Medical Research Council (MRC) guidance (19) on development, evaluation and implementation of complex interventions, the original LiFE programme was customised to the needs of a younger target group. The PreventIT consortium adapted and piloted the LiFE activities in order to make them adequately challenging, complex and meaningful for a younger target population (**aLiFE**) (20, 21) (paper submitted). In addition, the consortium further developed the behavioural change elements of the intervention (22), mapping these to behaviour change theory and techniques (23) (Table 1). Iterative stages of feasibility testing and evaluation of the aLiFE programme were applied including a proof of concept pilot study (ISRCTN37750605 <https://doi.org/10.1186/ISRCTN37750605>). Subsequently, the aLiFE programme was transferred to a mobile health application system (PreventIT mHealth system) (24), called **eLiFE** (enhanced LiFE) programme, delivering the intervention on smartphones and smartwatches.

In order to assess feasibility and usability, evaluate and further improve the intervention, and to suggest sample size and design for a future Phase III clinical trial, this feasibility study is currently being conducted, comparing eLiFE and aLiFE interventions to a control group.

Table 1. Behaviour change techniques adopted within aLiFE and eLiFE

| Behaviour Change Techniques*                                          | aLiFE Content                          | eLiFE Content                               |
|-----------------------------------------------------------------------|----------------------------------------|---------------------------------------------|
| <b>1. Goals and planning</b>                                          |                                        |                                             |
| 1.1 Goal setting (behaviour – which activities, where and how often). | Daily Routine Chart, Activity Planner. | App content (planning screens), instructor. |

|                                                     |                                                             |                                                                       |
|-----------------------------------------------------|-------------------------------------------------------------|-----------------------------------------------------------------------|
| 1.2 Problem solving.                                | Manual, instructor,                                         | App content, instructor.                                              |
| 1.3 Goal setting (outcome – long term).             | Paper form, instructor.                                     | App content (planning screens), instructor.                           |
| 1.4 Action Planning.                                | Activity Planner, instructor.                               | App content (planning screens), instructor.                           |
| 1.5 Review behavioural goals.                       | Activity Planner, Activity Counter.                         | App content (daily reporting).                                        |
| 1.6 Discrepancy between current behaviour and goal. | Paper form, Activity Planner.                               | App content (motivational messaging, activity reporting).             |
| 1.7 Review outcome goals.                           | Paper form, Activity Planner, Activity Counter, instructor. | App content (motivational messaging, activity reporting).             |
| <b>2. Feedback and monitoring</b>                   |                                                             |                                                                       |
| 2.2 Feedback on behaviour.                          | Instructor.                                                 | App content (real-time feedback).                                     |
| 2.3 Self-monitoring of behaviour.                   | Activity Planner, Activity Counter.                         | App content (activity reporting).                                     |
| 2.4 Self-monitoring of outcomes of behaviour.       | Activity Planner, Activity Counter.                         | App content (motivational messaging).                                 |
| 2.6 Biofeedback                                     | Not included.                                               | System components (accelerometer) and app content (feedback screens). |
| 2.7 Feedback on outcomes of behaviour.              | Instructor.                                                 | App content (real-time feedback).                                     |
| <b>3. Social support</b>                            |                                                             |                                                                       |
| 3.1 Social support                                  | Instructor.                                                 | App content (motivational messaging).                                 |
| <b>4. Shaping knowledge</b>                         |                                                             |                                                                       |
| 4.1 Instruction on how to perform the behaviour.    | Manual, instructor.                                         | App content (text, pictures, videos).                                 |
| <b>5. Natural consequences</b>                      |                                                             |                                                                       |
| 5.1 Information about health consequences.          | Manual.                                                     | App content (motivational messaging).                                 |
| 5.3 Information about social and                    | Manual.                                                     | App content (motivational                                             |

|    |                                                 |                                                                  |                                                                                   |
|----|-------------------------------------------------|------------------------------------------------------------------|-----------------------------------------------------------------------------------|
| 1  |                                                 |                                                                  |                                                                                   |
| 2  |                                                 |                                                                  |                                                                                   |
| 3  | environmental consequences.                     |                                                                  | messaging).                                                                       |
| 4  |                                                 |                                                                  |                                                                                   |
| 5  | <b>6. Comparison of behaviour</b>               |                                                                  |                                                                                   |
| 6  |                                                 |                                                                  |                                                                                   |
| 7  | 6.1 Demonstrate the behaviour.                  | Manual (text, pictures),<br>instructor.                          | App content (text, pictures,<br>videos).                                          |
| 8  |                                                 |                                                                  |                                                                                   |
| 9  |                                                 |                                                                  |                                                                                   |
| 10 | 6.2 Social comparison.                          | Not included.                                                    | App content (motivational<br>messaging).                                          |
| 11 |                                                 |                                                                  |                                                                                   |
| 12 |                                                 |                                                                  |                                                                                   |
| 13 | 6.3 Information about others'<br>approval.      | Not included.                                                    | App content (motivational<br>messaging).                                          |
| 14 |                                                 |                                                                  |                                                                                   |
| 15 |                                                 |                                                                  |                                                                                   |
| 16 | <b>7. Associations</b>                          |                                                                  |                                                                                   |
| 17 |                                                 |                                                                  |                                                                                   |
| 18 | 7.1 Prompts / cues.                             | Manual, instructor.                                              | App content (planning screens).                                                   |
| 19 |                                                 |                                                                  |                                                                                   |
| 20 | <b>8. Repetition and substitution</b>           |                                                                  |                                                                                   |
| 21 |                                                 |                                                                  |                                                                                   |
| 22 | 8.1 Behavioural practice/rehearsal.             | Manual, instructor                                               | App content (planning screens,<br>real-time feedback, motivational<br>messaging). |
| 23 |                                                 |                                                                  |                                                                                   |
| 24 |                                                 |                                                                  |                                                                                   |
| 25 |                                                 |                                                                  |                                                                                   |
| 26 |                                                 |                                                                  |                                                                                   |
| 27 | 8.3 Habit formation.                            | Manual, instructor,<br>Activity Planner, Activity<br>Counter.    | App content (planning screens,<br>real-time feedback, motivational<br>messaging). |
| 28 |                                                 |                                                                  |                                                                                   |
| 29 |                                                 |                                                                  |                                                                                   |
| 30 |                                                 |                                                                  |                                                                                   |
| 31 | 8.6 Generalisation of a target<br>behaviour.    | Manual, instructor, Daily<br>Routine Chart, Activity<br>Planner. | App content (motivational<br>messaging).                                          |
| 32 |                                                 |                                                                  |                                                                                   |
| 33 |                                                 |                                                                  |                                                                                   |
| 34 |                                                 |                                                                  |                                                                                   |
| 35 |                                                 |                                                                  |                                                                                   |
| 36 | 8.7 Graded tasks.                               | Manual, instructor.                                              | App content (planning screens,<br>real-time feedback, motivational<br>messaging). |
| 37 |                                                 |                                                                  |                                                                                   |
| 38 |                                                 |                                                                  |                                                                                   |
| 39 |                                                 |                                                                  |                                                                                   |
| 40 | <b>10. Reward and threat</b>                    |                                                                  |                                                                                   |
| 41 |                                                 |                                                                  |                                                                                   |
| 42 | 10.10 Reward (outcome).                         | Instructor.                                                      | App content (real-time feedback,<br>motivational messaging).                      |
| 43 |                                                 |                                                                  |                                                                                   |
| 44 |                                                 |                                                                  |                                                                                   |
| 45 | 10.3 Non-specific reward.                       | Instructor.                                                      | App content (real-time feedback,<br>motivational messaging).                      |
| 46 |                                                 |                                                                  |                                                                                   |
| 47 |                                                 |                                                                  |                                                                                   |
| 48 | <b>12. Antecedents</b>                          |                                                                  |                                                                                   |
| 49 |                                                 |                                                                  |                                                                                   |
| 50 | 12.1 Restructuring the physical<br>environment. | Manual, instructor.                                              | App content (planning screens,<br>motivational messaging).                        |
| 51 |                                                 |                                                                  |                                                                                   |
| 52 |                                                 |                                                                  |                                                                                   |
| 53 | 12.2 Restructuring the social<br>environment.   | Manual, instructor.                                              | App content (planning screens,<br>motivational messaging).                        |
| 54 |                                                 |                                                                  |                                                                                   |
| 55 |                                                 |                                                                  |                                                                                   |
| 56 |                                                 |                                                                  |                                                                                   |
| 57 |                                                 |                                                                  |                                                                                   |
| 58 |                                                 |                                                                  |                                                                                   |
| 59 |                                                 |                                                                  |                                                                                   |
| 60 |                                                 |                                                                  |                                                                                   |

## 15. Self-belief

|                                         |               |                                       |
|-----------------------------------------|---------------|---------------------------------------|
| 15.1 Verbal persuasion about capability | Not included. | App content (motivational messaging). |
| 15.3 Focus on past success              | Not included. | App content (motivational messaging). |

---

\*Using Michie et al, 2013 (23)

## Aims

The aim of the multicentre randomised controlled feasibility trial is to assess the feasibility of eLiFE and aLiFE programmes, integrating activities into daily life, versus a control group, targeting young older adults between 61-70 years. There are 5 main research questions: 1) **Participation:** What are the levels of adherence of young older adults to specific activities and to the entire eLiFE and aLiFE intervention over the course of the study period? 2) **Technology:** What is the acceptability of the eLiFE intervention delivered using technology (smartphones and smartwatches) including user interface, goal setting, feedback, motivational messages, and social interaction? 3) **Feasibility and usability:** What is the feasibility of the eLiFE and aLiFE intervention programmes in a cohort of young older adults: What are the possible harms (adverse events) of the eLiFE or aLiFE intervention? What is the acceptability of eLiFE and aLiFE activities (usefulness, safety, difficulty level, adaptability/personalisation, planning and uptake of exercises)? Are the RCT methods suitable (recruitment, randomisation, follow up, outcomes etc.)? 4) **Estimates of change:** What is the change in function, as measured by two primary clinical outcome measures: the Later Life Function and Disability Instrument (LLDFI) and the behavioural complexity metric, for the eLiFE and the aLiFE interventions compared to the control group? What are the estimated effect sizes for LLFDI, complexity metric, and the secondary study outcome measures? 5) **Health Economics Evaluation:** Is it feasible to collect data in order to estimate health care resource utilisation, costs and quality-adjusted life years (QALYs), and model incremental cost-effectiveness ratios (ICERs) of aLiFE and eLiFE compared with the control group over a 6-month and 12-month time period?

## METHODS

### Trial design

The study uses a three arm RCT design, performed at three clinical sites including a total of 180 participants (60 participants at each site; 20 participants in each arm per site). Inclusion of participants started in March 2017 with a 6-months intervention period and 12-month follow up from baseline lasting until August 2018.

### Study setting and test procedures

The three participating study sites are Trondheim, Norway; Amsterdam, The Netherlands; and Stuttgart, Germany. Telephone screening, risk screening, medical assessment as well as three on-site assessments (T1, T2, T3) are undertaken in university facilities (NTNU Trondheim and Vrije Universiteit Amsterdam) and academic hospital (Robert Bosch Krankenhaus, Stuttgart). All other participant contact is through home visits or telephone communication. Participants are assessed at baseline (T1) within 6 weeks of initial screening, post-test (T2) 182 days after the first home visit ( $\pm 2$  weeks), and follow-up after 12 months (T3) (364 days  $\pm 4$  weeks after the first home visit). Trained assessors (blinded to group allocation) perform all assessments at the collaborating centres. Each assessment lasts approximately 1.5 to 2.5 hours.

### Eligibility criteria

Persons born between 01/01/1947 and 31/12/1956 (61-70 years of age at recruitment begin) were invited to participate via mail. Persons within the target group were randomly selected from three local population registries (The National Registry in Norway, the Municipality Registry of Amsterdam, and the Stuttgart Registry in Germany). The inclusion and exclusion criteria are presented in Table 2. Eligibility for participation is determined through a telephone interview, a risk screening for functional decline, and a medical screening. Rates of eligibility at each stage of the inclusion process are monitored.

Table 2. Inclusion and exclusion criteria.

|                     | Inclusion criteria                | Exclusion criteria                                               |
|---------------------|-----------------------------------|------------------------------------------------------------------|
| Telephone screening | Between 61 and 70 years of age    | Current participation in an organised exercise class >1 per week |
|                     | Retired (more than 6 months, <50% | Moderate-intensity physical activity                             |

|                                                       |                                                  |                                                                                     |
|-------------------------------------------------------|--------------------------------------------------|-------------------------------------------------------------------------------------|
|                                                       | paid/unpaid work)                                | ≥150 min/week in the previous 3 months                                              |
|                                                       | Community dwelling                               | Travels >2 months planned during intervention period                                |
|                                                       | Able to read a newspaper or text on a smartphone |                                                                                     |
|                                                       | Speaks Norwegian/Dutch/German                    |                                                                                     |
|                                                       | Able to walk 500 m without walking aid           |                                                                                     |
|                                                       | Available for home visits the following 6 weeks  |                                                                                     |
| <b>Risk screening</b>                                 | “At risk” for functional decline                 | Cognitive impairment (Montreal Cognitive Assessment, MOCA <24 points)               |
|                                                       |                                                  | Acute depression (STU and AMS)                                                      |
| <b>Medical screening</b>                              |                                                  | Medical condition (heart failure New York Heart Association (NYHA) class III and IV |
|                                                       |                                                  | Acute myocardial infarction last 6 months or unstable angina                        |
|                                                       |                                                  | Pericarditis, myocarditis, endocarditis in the last 6 months                        |
|                                                       |                                                  | Symptomatic aortic stenosis; cardiomyopathy                                         |
|                                                       |                                                  | Resting blood pressures of a systolic >180 or diastolic >100 or higher              |
|                                                       |                                                  | Chronic Obstructive Pulmonary Disease (COPD) Gold class III and IV                  |
|                                                       |                                                  | Uncontrolled asthma at least 2 exacerbation in the last 6 months                    |
|                                                       |                                                  | Amputated lower extremities                                                         |
|                                                       |                                                  | Active cancer treatment during last 6 months                                        |
|                                                       |                                                  | Ankylosing spondylitis                                                              |
|                                                       |                                                  | History of schizophrenia                                                            |
|                                                       |                                                  | Parkinson’s disease                                                                 |
| Recently diagnosed cerebrovascular accident <6 months |                                                  |                                                                                     |
| Epilepsy treated with medication                      |                                                  |                                                                                     |

|                         |  |                                                                                                     |
|-------------------------|--|-----------------------------------------------------------------------------------------------------|
|                         |  | Severe RA interfering with mobility                                                                 |
|                         |  | Fracture of lumbar spinal vertebra/thoracic spinal vertebra or lower extremity in the last 6 months |
|                         |  | 3 fractures in the last 2 years due to severe osteoporosis                                          |
|                         |  | Acute depression (TRD)                                                                              |
| After screening process |  | Spouse/living together with an already included participant in this trial                           |

TRD: Clinical site Trondheim, STU: Clinical site Stuttgart, AMS: Clinical site Amsterdam

### Sample size and recruitment

No sample size calculation was performed for this study as it is a feasibility study not designed to conclude on effectiveness. However, based on a Norwegian population-based study (25) the sample size (n=180) is estimated to be large enough to estimate critical parameters (26), which equals twice the minimum required number of participants suggested (2x n=90) as a general rule to estimate a parameter (27, 28).

Participants are drawn from the general population with the purpose of identifying those estimated to be at risk of accelerated functional decline. The number required to invite in order to reach 180 participants is not predefined, due to insufficient knowledge about ability/function in this age group and because the risk screening tools (see below) are newly developed (16). A contact list was provided for home-dwelling individuals between 61 and 70 years of age living in Trondheim, Amsterdam, and Stuttgart, stratified by age and with even distribution of men and women in each age stratum. The initial draw from each local registry was set at 2000 persons, with the intention of performing a second draw if necessary.

### Screening

We recruited persons who actively replied to their respective study site by telephone or email following the mailing and invited them to undergo a multi-step screening, starting with a structured **telephone interview** to determine interest and eligibility, which amongst other criteria included being retired and currently not undertaking more than 150 min of moderate/vigorous physical activity per week (Table 2). Eligible participants are then invited

1  
2  
3 to an on-site risk screening and medical assessment (Table 2). All participants sign an  
4 informed consent form prior to commencing the on-site assessments.  
5

6 An online web-based tool developed through the PreventIT project, (**the PreventIT risk**  
7 **screening tool**), is used to identify participants' risk for functional decline (16). This is a  
8 newly developed tool, where the risk for functional decline over the next nine years is  
9 estimated and participants are classified as being at "low risk", "medium risk", or "high risk".  
10 At time of commencing recruitment the tool had not yet been validated. Initially only  
11 participants identified as being at "medium risk" were to be included in the study, as prior  
12 analyses in other cohort data indicated that this would be a third of potential participants (16).  
13 The telephone screening, which preceded on-site screening and assessment, was designed to  
14 exclude the majority of 'low risk' participants. Subsequently applying the risk screening tool  
15 on the selected sample showed that only about 10% of individuals invited for face-to-face  
16 assessment are classified as 'medium risk' and hence eligible for inclusion. Therefore, the  
17 selection of participants based on the risk screening tool was discontinued and the risk  
18 screening tool is now applied to estimate and describe the participants' specific risk for  
19 functional decline within the recruited cohort. Participants who complete the face-to-face risk  
20 screening and are not excluded due to cognitive impairment (MOCA >24) (29), are invited to  
21 a **medical screening** to ensure participation in an exercise intervention is not contraindicated.  
22 When all inclusion criteria are met, participants are invited to perform a **full baseline**  
23 **assessment** (T1).  
24  
25  
26  
27  
28  
29  
30  
31  
32  
33  
34  
35

### 36 **Data collection and outcome measures**

37  
38  
39 All eligible participants undergo a phone screening, risk screening, medical screening and  
40 three measurements: one at entry into the study (baseline assessment, T1), one after the 6-  
41 month intervention period (T2) and one after completing the 6 months passive follow-up  
42 period (12-months assessment, T3). Table 3 highlights the measures collected, Table 4  
43 provides a summary of the schedule of enrolment, interventions, and assessments, and Table 5  
44 provides an overview of intervention timeframe.  
45  
46  
47  
48  
49  
50  
51  
52  
53  
54  
55  
56  
57  
58  
59  
60



1  
2  
3  
4  
5  
6  
7  
8  
9  
10  
11  
12  
13  
14  
15  
16  
17  
18  
19  
20  
21  
22  
23  
24  
25  
26  
27  
28  
29  
30  
31  
32  
33  
34  
35  
36  
37  
38  
39  
40  
41  
42  
43  
44  
45  
46  
47  
48  
49  
50  
51  
52  
53  
54  
55  
56  
57  
58  
59  
60

For peer review only

Table 3. List of assessments and outcome measures collected during telephone screening, risk screening, medical screening, baseline assessment, after 6 months active intervention and further 6 months passive follow up.

|                                                                                                                                                                                                                                                                                                              | TS | RS | MS | T1 | T2 | T3 | O        |
|--------------------------------------------------------------------------------------------------------------------------------------------------------------------------------------------------------------------------------------------------------------------------------------------------------------|----|----|----|----|----|----|----------|
| <b>Socio demographic</b>                                                                                                                                                                                                                                                                                     |    |    |    |    |    |    |          |
| Age, gender, employment status, living arrangements (community-dwelling or residential aged care facility), number of co-habitants, years of education                                                                                                                                                       | ✓  |    |    |    |    |    | —        |
| Economic satisfaction (good, sufficient, bad/poor)                                                                                                                                                                                                                                                           |    | ✓  |    |    |    |    | —        |
| Prior experience with using smartphone technology (yes/no)                                                                                                                                                                                                                                                   |    |    |    | ✓  |    |    | —        |
| <b>General health and function</b>                                                                                                                                                                                                                                                                           |    |    |    |    |    |    |          |
| Ability to walk 500m without walking aid                                                                                                                                                                                                                                                                     | ✓  |    |    |    |    |    | —        |
| Ability to read newspaper in print and on a smartphone                                                                                                                                                                                                                                                       | ✓  |    |    |    |    |    | —        |
| Participation in an organised exercise group > 1 per week (yes/no)                                                                                                                                                                                                                                           | ✓  |    |    |    | ✓  | ✓  | <b>S</b> |
| Currently undertaking 150 minutes or more in moderate-intensity PA per week (yes/no)                                                                                                                                                                                                                         | ✓  |    |    |    | ✓  | ✓  | <b>S</b> |
| Amount of moderate-intensity PA undertaken per week (hardly active; mostly seated activities; light-intensity PA (2-4 hours per week); moderate-intensity PA (1-2 hours per week) or light-intensity PA (>4 hours per week); moderate-intensity >3 hours per week; high-intensity PA several times per week) | ✓  |    |    |    | ✓  | ✓  | <b>S</b> |
| Late-Life Function and Disability Instrument, LLFDI, to assess meaningful change in function (person's ability to do discrete actions/activities) and disability (person's performance of                                                                                                                    |    |    |    | ✓  | ✓  | ✓  | <b>P</b> |

1  
2  
3  
4  
5  
6  
7  
8  
9  
10  
11  
12  
13  
14  
15  
16  
17  
18  
19  
20  
21  
22  
23  
24  
25  
26  
27  
28  
29  
30  
31  
32  
33  
34  
35  
36  
37  
38  
39  
40  
41  
42  
43  
44  
45  
46  
47

|                                                                                                                                                |   |   |   |   |   |          |          |
|------------------------------------------------------------------------------------------------------------------------------------------------|---|---|---|---|---|----------|----------|
| socially defined tasks) (30, 31)                                                                                                               |   |   |   |   |   |          |          |
| <b>Medical history and medication use</b>                                                                                                      |   |   |   |   |   |          |          |
| 'Have you seen a doctor for being diagnosed for having problems with your joints' <sup>a</sup>                                                 | ✓ |   |   | ✓ | ✓ | —        |          |
| 'Have you seen a doctor for being diagnosed for having problems with your heart' <sup>b</sup>                                                  | ✓ |   |   | ✓ | ✓ | —        |          |
| Medications used (total number, type, frequency, dosage)                                                                                       |   | ✓ | ✓ | ✓ | ✓ | <b>S</b> |          |
| Fall history (count over last 12 months)                                                                                                       |   |   |   | ✓ | ✓ | ✓        | <b>S</b> |
| Pain during rest and walking (numeric scale, score 0-10) (36)                                                                                  |   |   |   | ✓ | ✓ | ✓        | <b>S</b> |
| Blood pressure (mmHg) in lying and standing (after 1 and 3 minutes); pulse, vision, hearing                                                    |   |   | ✓ |   |   |          | —        |
| Comorbidities (number, type, date of diagnosis and treatment)                                                                                  |   |   | ✓ |   |   |          | —        |
| Height (cm), weight (kg)                                                                                                                       |   |   | ✓ |   |   |          | —        |
| Regular alcohol consumption per week (units)                                                                                                   |   | ✓ |   |   |   |          | —        |
| <b>Neuropsychological</b>                                                                                                                      |   |   |   |   |   |          |          |
| Center for Epidemiologic Studies Depression Scale (CES-D score) to assess symptoms of depression and mood (score range 0-60) (37) *            |   | ✓ |   | ✓ | ✓ |          | <b>S</b> |
| 7- Item Short Version Falls Efficacy Scale-International (FES-I) (score) (38) plus 3 additional FES-I items to assess "fear of falling" * (39) |   | ✓ |   | ✓ | ✓ |          | <b>S</b> |
| Montreal Cognitive Assessment tool, MoCA (converted MoCA score) to assess cognitive function (score _/30) (29) *                               |   | ✓ |   | ✓ | ✓ |          | <b>S</b> |

| <b>Physical</b>                                                                                                                                                                                                 |                 |   |   |   |          |
|-----------------------------------------------------------------------------------------------------------------------------------------------------------------------------------------------------------------|-----------------|---|---|---|----------|
| Gait speed over 4m (usual pace) <b>(40)</b> and 7m (usual pace <u>and</u> as fast as possible) <b>(41)</b> (best of two trials per measure, m/sec)                                                              | ✓ <sup>\$</sup> | ✓ | ✓ | ✓ | <b>S</b> |
| Hand grip strength using a dynamometer (kg, max score of 3 reps per hand, using the protocol of the inChianti study)                                                                                            | ✓               |   | ✓ | ✓ | —        |
| Five times-sit-to-stand to assess functional strength <b>(40)</b>                                                                                                                                               |                 | ✓ | ✓ |   | <b>S</b> |
| <b>Physical – balance</b>                                                                                                                                                                                       |                 |   |   |   |          |
| Able to perform ‘Tandem stance’ for 10 sec with eyes open (yes/no)                                                                                                                                              | ✓               |   |   |   | <b>S</b> |
| Community Balance and Mobility Scale (CB&MS) used to measure higher level balance and mobility <b>(42)</b>                                                                                                      |                 |   | ✓ | ✓ | <b>S</b> |
| Static balance measured using the 8-Level Balance scale <b>(18)</b>                                                                                                                                             |                 |   | ✓ | ✓ | <b>S</b> |
| <i>Physical – instrumented (participants have a smartphone attached to their lower back, instructions are provided by the assessor. Activity is recorded for the duration of the assessment)</i>                |                 |   |   |   |          |
| 30-second chair stand is completed to quantify strength <b>(35)</b>                                                                                                                                             |                 |   | ✓ | ✓ | <b>S</b> |
| Timed Up and Go <b>(33)</b> to measure sit-to-stand duration and movement jerk, mean step time, variability of step time, interstride trunk sway in anterior-posterior and medio-lateral directions <b>(34)</b> |                 |   | ✓ | ✓ | <b>S</b> |
| Tandem stance, 30 seconds, eyes closed, to assess sway in anterior-posterior and medio-lateral directions                                                                                                       |                 |   | ✓ | ✓ | <b>S</b> |

1  
2  
3  
4  
5  
6  
7  
8  
9  
10  
11  
12  
13  
14  
15  
16  
17  
18  
19  
20  
21  
22  
23  
24  
25  
26  
27  
28  
29  
30  
31  
32  
33  
34  
35  
36  
37  
38  
39  
40  
41  
42  
43  
44  
45  
46  
47

|                                                                                                                                                                                                                                                                 |   |   |          |
|-----------------------------------------------------------------------------------------------------------------------------------------------------------------------------------------------------------------------------------------------------------------|---|---|----------|
| Five times sit-to-stand to quantify strength and measure sit-to-stand duration                                                                                                                                                                                  | ✓ |   | <b>S</b> |
| Tandem stance, 30 seconds, eyes open, to assess sway in anterior-posterior and medio-lateral directions                                                                                                                                                         | ✓ |   | <b>S</b> |
| <i>Physical – self administered (Instructions are provided in written form (paper and smartphone) and acoustic cues are provided through the smartphone)</i>                                                                                                    |   |   |          |
| Timed Up and Go <b>(33)</b> is completed to measure sit-to-stand duration and movement jerk, mean step time, variability of step time, interstride trunk sway in anterior-posterior and medio-lateral directions <b>(34)</b>                                    | ✓ | ✓ | <b>S</b> |
| Tandem stance, 15 seconds, eyes closed, to assess sway in anterior-posterior and medio-lateral directions                                                                                                                                                       | ✓ |   | <b>S</b> |
| Tandem stance, 15 seconds, eyes open, to assess sway in anterior-posterior and medio-lateral directions                                                                                                                                                         |   | ✓ | <b>S</b> |
| Five times sit-to-stand to quantify strength and measure sit-to-stand duration                                                                                                                                                                                  | ✓ | ✓ | <b>S</b> |
| <b>Physical – Sensor-derived data</b>                                                                                                                                                                                                                           |   |   |          |
| Behavioural complexity of PA and sleep measured through activity monitoring (data collection for 7 continuous days) (type, duration, intensity)                                                                                                                 | ✓ | ✓ | <b>P</b> |
| Physical activity <b>(43)</b> (a set of sensor-based features extracted from signals, including the percentages of sedentary, active, and walking times, duration and intensity (metabolic equivalent) of the activities, and gait and turning characteristics) | ✓ | ✓ | <b>P</b> |

---

**Health economics / Quality of Life**


---

EuroQoL-5D, EQ-5D-5L to measure quality of life and as a utility-based quality of life instrument will be used for estimating QALYs (descriptive profile and a single index value for health-related quality of life) **(44)** ✓ ✓ ✓ **S**

12-Item Short Form survey, SF-12, to measure function and well-being / quality of life **(45)** ✓ ✓ ✓ **S**

A resource-use questionnaire is used to ascertain health resource utilisation (e.g. GP visits, medication use, and health care cost from a societal perspective) ✓ ✓ ✓ **S**

---

**Adherence (monthly follow-up during active and passive intervention period)**


---

Number of visits/calls successfully completed during the intervention period **S**

Withdrawals from intervention (n) **S**

PreventIT mHealth system use after 6 months (eLiFE only) **S**

Uptake and adherence to recommendations/LiFE (all 3 intervention arms, monthly question) was assessed via email (by use of a secure web-based form) or post including one reminder. "Over the last seven days, did you perform the recommended level of physical activity?" The response options are as follows: i) yes, I did more than I planned; ii) yes, I did them all; iii) yes, but not as much as I intended; iv) no, I did not feel well; v) no, I forgot; vi) No, I did not have time; vii) No, I don't like these activities. The control group's response is identical to the options from the active arm, except the generic term "physical activity" is used instead of "activities". **S**

Adherence to the recommendations/LiFE (all 3 intervention arms, at post-test and follow-up) and validation of the monthly adherence questions will be evaluated by use of the Exercise ✓ ✓ **S**

---

1  
2  
3  
4  
5  
6  
7  
8  
9  
10  
11  
12  
13  
14  
15  
16  
17  
18  
19  
20  
21  
22  
23  
24  
25  
26  
27  
28  
29  
30  
31  
32  
33  
34  
35  
36  
37  
38  
39  
40  
41  
42  
43  
44  
45  
46  
47

|                                                                                                                                                          |   |   |            |
|----------------------------------------------------------------------------------------------------------------------------------------------------------|---|---|------------|
| Adherence Ratio Scale (EARS) <b>(46)</b>                                                                                                                 | ✓ | ✓ | <b>S</b>   |
| <b>Experience, motivation and behavioural change</b>                                                                                                     |   |   |            |
| Self-Reported Behavioural Automaticity Index to assess habit formation (score, 7-point Likert scale) <b>(47)</b>                                         | ✓ | ✓ | <b>S</b>   |
| Level of ease or difficulty in engaging with the intervention and integrating balance, strength, and PA into everyday life (score, 7-point Likert scale) | ✓ | ✓ |            |
| Motivational aspects of the intervention (score, 7-point Likert scale)                                                                                   | ✓ | ✓ | <b>S</b>   |
| <b>Willingness to participate</b>                                                                                                                        |   |   |            |
| Recruitment numbers, dropouts (n), CONSORT (participant numbers through trial progression)                                                               |   |   |            |
| Health Action Process Approach (HAPA) to measure participants' motivation <b>(48)</b>                                                                    | ✓ | ✓ | ✓ <b>S</b> |
| <b>Usability of technology (eLiFE only)</b>                                                                                                              |   |   |            |
| The System Usability Scale <b>(49)</b> at post-test and 12 months follow-up                                                                              | ✓ | ✓ | <b>S</b>   |
| The Telehealthcare Satisfaction Questionnaire – Wearable Technology (TSQ-WT) <b>(50)</b> at post-test and 12 months follow-up                            | ✓ | ✓ | <b>S</b>   |
| Issues logs from eLiFE participants will be summarised and described                                                                                     |   |   |            |
| PreventIT mHealth system system feasibility, adherence and progression                                                                                   | ✓ | ✓ | <b>S</b>   |
| Usability technology (questionnaire)                                                                                                                     | ✓ | ✓ | <b>S</b>   |
| Data from PreventIT mHealth system                                                                                                                       | ✓ | ✓ | <b>S</b>   |

|    |                                                                                                          |   |     |
|----|----------------------------------------------------------------------------------------------------------|---|-----|
| 1  |                                                                                                          |   |     |
| 2  |                                                                                                          |   |     |
| 3  |                                                                                                          |   |     |
| 4  |                                                                                                          |   |     |
| 5  | - PA sensors (daily distribution of walking, sedentary time and active intervals)                        |   |     |
| 6  |                                                                                                          |   |     |
| 7  | - Daily reporting of activities (strength and balance goals achieved?)                                   |   |     |
| 8  |                                                                                                          |   |     |
| 9  | - Use of smartphone (number of phone calls, SMS, number of contacts, GPS location (STU and TRD only))    |   |     |
| 10 |                                                                                                          |   |     |
| 11 |                                                                                                          |   |     |
| 12 | - Use of application (usage, changes in activity selection)                                              |   |     |
| 13 |                                                                                                          |   |     |
| 14 | - Difficulties with technology (via an Issue Log)                                                        |   |     |
| 15 |                                                                                                          |   |     |
| 16 | Acceptability of the intervention                                                                        | ✓ | S   |
| 17 |                                                                                                          |   |     |
| 18 | Focus groups (10 participants per intervention arm, at each site): qualitative analysis of               | ✓ | S   |
| 19 | narratives of experience of recruitment process, randomisation process, screening and                    |   |     |
| 20 | assessments, home visits, instructors, tools used (paper-based or technology), support in                |   |     |
| 21 | intervention period, activities undertaken, ideas for improvement. Qualitative data will also be         |   |     |
| 22 | used to evaluate usability of technology.                                                                |   |     |
| 23 |                                                                                                          |   |     |
| 24 |                                                                                                          |   |     |
| 25 | Focus groups (with all assessors and instructors): qualitative analysis of narratives of                 | ✓ | S   |
| 26 | recruitment process, training, successes and challenges in delivering intervention, ideas for            |   |     |
| 27 | improvement.                                                                                             |   |     |
| 28 |                                                                                                          |   |     |
| 29 | Issues logs from the instructors will be evaluated related to acceptability from the instructors'        |   | S   |
| 30 | perspectives                                                                                             |   |     |
| 31 |                                                                                                          |   |     |
| 32 | Acceptability questionnaire ( <b>51</b> ) with rating of helpfulness of a/eLiFE activities for improving | ✓ | ✓ S |
| 33 | balance, strength, PA; perceived safety during a/eLiFE practice; perceived level of difficulty,          |   |     |
| 34 | activity preference, adaptability of activities to fit individual lifestyles and daily activities        |   |     |
| 35 |                                                                                                          |   |     |
| 36 |                                                                                                          |   |     |
| 37 | Adverse events – intervention related and unrelated                                                      |   | S   |
| 38 |                                                                                                          |   |     |
| 39 |                                                                                                          |   |     |
| 40 |                                                                                                          |   |     |
| 41 |                                                                                                          |   |     |
| 42 |                                                                                                          |   |     |
| 43 |                                                                                                          |   |     |
| 44 |                                                                                                          |   |     |
| 45 |                                                                                                          |   |     |
| 46 |                                                                                                          |   |     |
| 47 |                                                                                                          |   |     |



1  
2  
3  
4  
5 \* assessment is part of the risk screening and eligibility criteria, as well as being an outcome measure. \$ only 7 meter walk at fast pace was assessed during  
6 the RS. *TS = Telephone screening, RS= Risk screening, MS = Medical Screening, BA=Baseline Assessment, 6mth = Assessment 6mths post randomisation,*  
7 *12mth= Assessment 12mth post randomisation, O=Outcome measure, S=secondary, P=Primary, x=not an outcome measure, TRD= clinical site Trondheim,*  
8 *Norway, STU= clinical site Stuttgart, Germany, PA= Physical activity.* <sup>a</sup>question is answered yes/no, and if “yes”, if any of arthrosis, rheumatologic diseases,  
9 or other arthropaties or joint disorders is registered <sup>b</sup>question is answered yes/no, and if “yes”, if any of heart failure, myocardial infarction cardiac  
10 dysrhythmias or arres, valvular disease, other ischemic heart disease is registered, and if “no”, if any of cerebrovascular disease or stroke, hypertension/high  
11 blood pressure, or peripheral artery disease is registered.  
12  
13  
14  
15  
16  
17  
18  
19  
20  
21  
22  
23  
24  
25  
26  
27  
28  
29  
30  
31  
32  
33  
34  
35  
36  
37  
38  
39  
40  
41  
42  
43  
44  
45  
46  
47

PreventIT Protocol paper submitted BMJ Open

Table 4. Schedule of enrolment, interventions, and assessments

|                                     | Study period    |                 |                |            |                 |                  |         |                 |    |                 |
|-------------------------------------|-----------------|-----------------|----------------|------------|-----------------|------------------|---------|-----------------|----|-----------------|
|                                     | Enrolment       |                 | Pre-allocation | Allocation | Post-allocation |                  |         |                 |    |                 |
| Timepoint                           | -t <sub>2</sub> | -t <sub>1</sub> | T1             | 0          | PA <sub>1</sub> | HV1 <sup>§</sup> | T2      | PA <sub>2</sub> | T3 | PA <sub>3</sub> |
| ENROLMENT                           |                 |                 |                |            |                 |                  |         |                 |    |                 |
| Telephone screening                 | x               |                 |                |            |                 |                  |         |                 |    |                 |
| Risk screening                      |                 | x               |                |            |                 |                  |         |                 |    |                 |
| Medical Screening                   |                 | x               |                |            |                 |                  |         |                 |    |                 |
| Randomisation                       |                 |                 |                | x          |                 |                  |         |                 |    |                 |
| ASSESSMENT *                        |                 |                 |                |            |                 |                  |         |                 |    |                 |
| Baseline                            |                 |                 | x              |            |                 |                  |         |                 |    |                 |
| PA monitoring                       |                 |                 |                |            | x               |                  |         | x               |    | x               |
| Reassessment                        |                 |                 |                |            |                 |                  | x       |                 |    |                 |
| Follow-up                           |                 |                 |                |            |                 |                  |         |                 | x  |                 |
| INTERVENTION (active intervention)  |                 |                 |                |            |                 |                  |         |                 |    |                 |
| eLiFE                               |                 |                 |                |            |                 | x — x            |         |                 |    |                 |
| aLiFE                               |                 |                 |                |            |                 | x — x            |         |                 |    |                 |
| Control Group                       |                 |                 |                |            |                 | x                |         |                 |    |                 |
| INTERVENTION (passive intervention) |                 |                 |                |            |                 |                  |         |                 |    |                 |
| eLiFE                               |                 |                 |                |            |                 |                  | x ————— |                 | x  |                 |
| aLiFE                               |                 |                 |                |            |                 |                  | x ————— |                 | x  |                 |
| Control Group                       |                 |                 |                |            |                 | x —————          |         |                 | x  |                 |

\* Outcome measures collected during the assessments are listed in Table 3.

§ Home visit (HV) 1 was completed 8-15 days after the baseline assessment.

PreventIT Protocol paper submitted BMJ Open

PA monitoring / PA<sub>1</sub>, PA<sub>2</sub>, PA<sub>3</sub> participants physical activity was monitored for 7 consecutive days. No contact to the research team was permitted during this time.

Table 5. Overview of intervention timeframe

| Time point     | eLiFE                                              | aLiFE               |
|----------------|----------------------------------------------------|---------------------|
| <b>Week 0</b>  | Extra home visit if no prior smartphone experience |                     |
| <b>Week 1</b>  | Home visit 1                                       | Home visit 1        |
| <b>Week 2</b>  | Home visit 2                                       | Home visit 2        |
| <b>Week 4</b>  | <i>Phone call 1</i>                                | Home visit 3        |
| <b>Week 5</b>  | Home visit 3                                       | <i>Phone call 1</i> |
| <b>Week 6</b>  |                                                    | Home visit 4        |
| <b>Week 9</b>  | Home visit 4                                       | Home visit 5        |
| <b>Week 11</b> |                                                    | <i>Phone call 2</i> |
| <b>Week 13</b> | <i>Phone call 2</i>                                | Home visit 6        |
| <b>Week 17</b> | <i>Phone call 3</i>                                | <i>Phone call 3</i> |

### Blinding

All pre-intervention measures are assessed by trained research staff and the medical screening by medically qualified members of the research teams at the respective sites prior to randomisation. Post-intervention measures are collected by personnel blinded to group allocation. Due to the nature of the intervention, it is not possible to blind participants or the instructors delivering the intervention. Outcome measures which identify group allocation (e.g. technology acceptability questionnaires) are collected by unblinded research staff.

### Primary outcome measures

The two primary clinical outcomes are related to change in function and measured using the **Late-Life Function and Disability Instrument (LLFDI)** (30, 31) and a **complexity metric** (20), further developed and adapted within the project to assess **behavioural complexity** in the domains of physical activity, sleep, and social participation.

PreventIT Protocol paper submitted BMJ Open

### *Late-life function and disability*

The Late-Life Function and Disability Instrument (LLFDI) was developed as a comprehensive questionnaire assessing function and disability for use in community-dwelling older adults (30, 31). The LLFDI contains items that represent functional limitations (inability to perform discreet physical tasks encountered in daily routines) and disability (inability to take part in major life tasks and social roles). The LLFDI assesses function in 32 physical activities (in three dimensions: upper extremity, basic lower extremity, and advanced lower extremity) and disability in 16 major life tasks.

### *Complexity metric*

Physical activity and sleep data are collected via physical activity monitoring. After each measurement point (T1, T2, T3), participants' physical activity are monitored for 7 consecutive days using activity monitors at the lower back (fixed using adhesive tape) and the wrist (fixed in an elastic wrist band) (AX3 sensors from Axivity: <http://axivity.com/product/ax3>). Assessment on social interaction is based on detection of outdoor walking derived from the timing and the number of steps of walking episodes. Frequency and number of SMSs and phone calls and GPS statistics are also used as possible social interaction measures. These statistics are anonymous, without identifying the caller/sender. Data on physical behaviour are represented as time series embedding fundamental activity characteristics (i.e., type, duration, and intensity). The concept of **complexity** in physical behaviour postulates that high functional status is characterised by freedom of movement in terms of flexibility, ability to successfully achieve daily tasks, physical performance, diversity of activities, and participation in social life. On the other hand, advanced ageing and age-related adverse events may be characterised by progressive movement impairment, difficulties with daily tasks, and limitation of activities and social life, i.e., less complex physical behaviour (32).

### **Secondary outcome measures**

Secondary outcome measures are listed in Table 3 and include socio-demographic data, outcomes regarding general health and function, medical history, medication use, neuropsychological assessments, measures of physical ability, and quality of life measures. Further data are collected for economic evaluation purposes. During the 12 month follow-up period monthly adherence rates are monitored and detailed information about adherence to the interventions is collected during the 6 (T2) and 12 months (T3) assessments. Experience

PreventIT Protocol paper submitted BMJ Open

1  
2  
3 with the programme, motivation and behaviour change outcome measures, as well as  
4 outcome measures regarding willingness to participate, usability of technology, and  
5 acceptability of the intervention are collected after the active (first 6 months) and passive  
6 follow up period (further 6 months).  
7  
8

9  
10 As part of the on-site assessments, *self-administered tests* of mobility, balance and functional  
11 strength are used, where participants use a smartphone app to perform the “Timed Up and  
12 Go” (33), “Tandem stance, eyes open”, and “Five times sit-to-stand” tests by following  
13 instructions in the app, with no additional guidance from the assessor. This test battery is  
14 developed as part of the PreventIT project, and the acceptance of self-administered tests will  
15 be evaluated. The smartphone is worn in an elastic band around the participant’s waist  
16 during the self-administered tests, from which parameters such as sit-to-stand duration, jerk  
17 during sit-to-stand, mean step time, variability of step time, and interstride trunk sway in  
18 anterior-posterior and medio-lateral directions can be obtained (34). Participants also perform  
19 assessor guided versions of the Timed Up and Go, Tandem stance (eyes open and closed),  
20 Five times sit-to-stand, and the 30-second chair stand test originally from the Senior Fitness  
21 Test (35), during which the participants ‘wears’ the smartphone to record movement  
22 parameters as during the self-administered tests.  
23  
24  
25  
26  
27  
28  
29  
30  
31  
32  
33  
34  
35  
36  
37  
38  
39  
40  
41  
42  
43  
44  
45  
46  
47  
48  
49  
50  
51  
52  
53  
54  
55  
56  
57  
58  
59  
60

## Protocol paper: The PreventIT Feasibility RCT

### Randomisation

Randomisation is undertaken following one week of activity monitoring at baseline, using a web-based randomisation procedure developed, used and run by the Unit for Applied Clinical Research at the Faculty of Medicine and Health Sciences at NTNU. Randomisation is stratified to centre and performed by block randomisation, where block sizes can vary. One person at each site, unblinded to group allocation, has access to the web-based randomisation platform and forwards the result to the instructors who provide the intervention. Recruitment continues until 60 participants have completed their first home visit per study site.

### Interventions

Following the feedback from participants in a pilot study, the aLiFE activity framework is applied in both intervention arms. Details of the intervention components are shown in Table 6 (TiDieR Guidelines). In short, the programme consists of strategies a) to **improve balance** by use of four principles (“decreasing base of support”, “shifting your weight to the limits of stability”, “stepping over objects”, and “stepping, hopping and jumping in different ways”); b) to **increase muscle strength** by use of seven principles (“bend your knees”, “sit to stand”, “on your toes”, “on your heels”, “up the stairs”, “move sideways” and “tighten muscles”); and c) to **reduce sedentariness and increase physical activity** by teaching the participants two principles (“sit less” and “walk more”). In addition, the programme comprises a behavioural change model for developing intentions to become more physically active and turning these intentions into actions by embedding activities into daily life to make them habitual. As the participants learn the programme, they can find opportunities, choose other activities, and upgrade their existing activities (Table 6).

The activities are individually tailored to each participant’s functional status at the first home visit by use of an initial balance and strength assessment (the **LiFE assessment tool, LAT**) (17), defining the starting level for the balance and strength activities.

Both eLiFE and aLiFE participants receive home visits during which instructors teach and deliver the life-style integrated exercise programme. Three follow-up / booster phone calls are also provided during the 6 month active intervention period (Table 6). eLiFE participants receive instructions by use of video clips, pictures and text/verbal instructions in the PreventIT application on a smartphone for each activity and aLiFE participants use a paper-based manual

**Protocol paper: The PreventIT Feasibility RCT**

with descriptions and instructions for the same activities. eLiFE participants also receive technological support to navigate through the application. The architecture of the eLiFE application system is shown in Figure 1. The active intervention is scheduled for 6 months in order to be able to change behaviour (52, 53). Participants are encouraged to continue independently to use smartphones and smartwatches (eLiFE) or their paper materials (aLiFE) during the passive follow-up period (between months 7 and 12).

Table 6. Intervention description using the Template for Intervention Description and Replication (TIDieR) checklist.

|                   |                     |                                                                                                                                                                                                                                                                                                                                                                                                                                                                                                                                                                                                                                                                                                                                                                                          |                                                                                                                                                                                                                                                                         |                                                                                        |
|-------------------|---------------------|------------------------------------------------------------------------------------------------------------------------------------------------------------------------------------------------------------------------------------------------------------------------------------------------------------------------------------------------------------------------------------------------------------------------------------------------------------------------------------------------------------------------------------------------------------------------------------------------------------------------------------------------------------------------------------------------------------------------------------------------------------------------------------------|-------------------------------------------------------------------------------------------------------------------------------------------------------------------------------------------------------------------------------------------------------------------------|----------------------------------------------------------------------------------------|
| 1. Brief name     | Study name          | PreventIT<br>(Early risk detection and prevention in ageing people by self-administered ICT-supported assessment and a behavioural change intervention, delivered by use of smartphones and smartwatches)                                                                                                                                                                                                                                                                                                                                                                                                                                                                                                                                                                                |                                                                                                                                                                                                                                                                         |                                                                                        |
|                   | Intervention groups | The <b>aLiFE</b> programme<br><b>(experimental group 1)</b>                                                                                                                                                                                                                                                                                                                                                                                                                                                                                                                                                                                                                                                                                                                              | The <b>eLiFE</b> programme<br><b>(experimental group 2)</b>                                                                                                                                                                                                             | WHO guidelines<br><b>(control group)</b>                                               |
| 2. Why            |                     | A rapidly aging population will place increasing stress on our health care systems. The focus needs to shift from treatment towards health promotion for active and healthy ageing and prevention of age-related diseases. The PreventIT project has adapted a lifestyle-integrated exercise programme (LiFE) to suit healthy young older adults at risk for future accelerated functional decline into two interventions: One delivered by instructors and use of paper manuals (aLiFE), and one delivered via mobile phone (smartphone) with a virtual instructor (eLiFE). The aim is to develop and test a personalised behaviour change intervention on physical activity aimed at young older adults that has the potential to prevent accelerated functional decline at older age. |                                                                                                                                                                                                                                                                         |                                                                                        |
| 3. What materials |                     | All participants received a detailed risk and baseline assessment at their respective study sites, assessing medical history, physical and cognitive function and quality of life. All participants had their PA levels recorded for 7 consecutive day using activity monitors. In all three groups, participants completed habit formation and motivational questionnaires prior to beginning the intervention.                                                                                                                                                                                                                                                                                                                                                                         |                                                                                                                                                                                                                                                                         |                                                                                        |
|                   |                     | <b>Paper manual -</b><br>The aLiFE manual included descriptions and instructions of the activities selectable within the programme (strength and balance exercises), an activity planner (weekly use) and activity counter (daily use),                                                                                                                                                                                                                                                                                                                                                                                                                                                                                                                                                  | <b>PreventIT mHealth system on smartphone and smartwatch -</b><br>eLiFE was delivered via the PreventIT mHealth system. Participants received instructions by use of video clips, pictures and text/verbal instructions on the PreventIT smartphone for the activities. | One page WHO guidelines regarding recommended PA levels per week for the target group. |

## Protocol paper: The PreventIT Feasibility RCT

|                   |               |                                                                                                                                                                                                                                                                                                                                                                                                                                                                     |                                                                                                                                                                                                                                                                                                                                                                           |  |
|-------------------|---------------|---------------------------------------------------------------------------------------------------------------------------------------------------------------------------------------------------------------------------------------------------------------------------------------------------------------------------------------------------------------------------------------------------------------------------------------------------------------------|---------------------------------------------------------------------------------------------------------------------------------------------------------------------------------------------------------------------------------------------------------------------------------------------------------------------------------------------------------------------------|--|
|                   |               | safety instructions and further information about increasing physical activity and reducing sedentariness.                                                                                                                                                                                                                                                                                                                                                          | The architecture of the eLiFE application system is shown in Figure 1. Activity planning, reporting and feedback is provided entirely through the smartphone application. Participants receive one trouble-shooting document to aid with technological problems they may encounter. Instructors are available to help participants use the smartphone during home visits. |  |
| 4. What procedure |               | All participants receive a risk screening and medical assessment, to ensure study eligibility and rule out contra-indications to an exercise intervention. A detailed baseline assessment at a clinical site and a 7-day PA monitoring is completed. Participants are informed of their group allocation after their 7-days of PA monitoring is completed.                                                                                                          |                                                                                                                                                                                                                                                                                                                                                                           |  |
|                   |               | Intervention groups<br><br>Receive direct support through a trained staff member to implement the a/eLiFE programme into their daily life and understand the concept of the programme. Assistance is provided on how to select, upgrade and identify additional daily situations to integrate activities. Participants receive home visits as well as support phone calls during the 6-month active intervention period as part of the ongoing active intervention. | Control group<br><br>During a single home visit the written WHO guidelines are provided to participants with guidance on the dose-response relationship between the frequency, duration, intensity, type and total amount of physical activity recommended per week.                                                                                                      |  |
| 5. Who provided   | Assessment    | All assessments completed at the clinical sites are completed by blinded research staff with tertiary qualification as physiotherapists or exercise scientists. Assessments are completed at baseline (T1), 6 months post-randomisation (T2) and 12 months post-randomisation (T3).                                                                                                                                                                                 |                                                                                                                                                                                                                                                                                                                                                                           |  |
|                   | Intervention  | Following randomisation, participants receive the relevant intervention delivered in their home, provided by physiotherapists or exercise scientists. All staff had undergone a 3-day workshop to ensure standardised intervention delivery across all three clinical sites.                                                                                                                                                                                        |                                                                                                                                                                                                                                                                                                                                                                           |  |
| 6. How            | Invitation to | Persons born between 1947 and 1956 (61-70 years of age at the time of inclusion) were                                                                                                                                                                                                                                                                                                                                                                               |                                                                                                                                                                                                                                                                                                                                                                           |  |



## Protocol paper: The PreventIT Feasibility RCT

|                      |                                      |                                                                                                                                                                                                                                                                                                                                                                                                                                                                                                                                                                                             |                                                                                                                                                                                                                                                                                                                                                                                                                                                      |                                       |
|----------------------|--------------------------------------|---------------------------------------------------------------------------------------------------------------------------------------------------------------------------------------------------------------------------------------------------------------------------------------------------------------------------------------------------------------------------------------------------------------------------------------------------------------------------------------------------------------------------------------------------------------------------------------------|------------------------------------------------------------------------------------------------------------------------------------------------------------------------------------------------------------------------------------------------------------------------------------------------------------------------------------------------------------------------------------------------------------------------------------------------------|---------------------------------------|
|                      | participate                          | invited via mail-out to participate. Three respective local registries randomly selected persons within the target group. Participants were required to actively contact their respective site if they were interested.                                                                                                                                                                                                                                                                                                                                                                     |                                                                                                                                                                                                                                                                                                                                                                                                                                                      |                                       |
|                      | Telephone screening                  | A telephone screening determined eligibility to attend the risk screening of potential participants.                                                                                                                                                                                                                                                                                                                                                                                                                                                                                        |                                                                                                                                                                                                                                                                                                                                                                                                                                                      |                                       |
|                      | Risk screening and medical screening | The risk screening is completed by trained researchers and a medical screening is completed by medical doctors at each site. The multistep process ensures participants meet in/exclusion criteria, and that an exercise programme is deemed safe from a medical perspective.                                                                                                                                                                                                                                                                                                               |                                                                                                                                                                                                                                                                                                                                                                                                                                                      |                                       |
|                      | T1, T2, T3 assessment                | The assessments are completed by blinded research staff at the three clinical sites.                                                                                                                                                                                                                                                                                                                                                                                                                                                                                                        |                                                                                                                                                                                                                                                                                                                                                                                                                                                      |                                       |
|                      |                                      | The interventions (aLiFE and eLiFE) are delivered in the participants' home, the types of activities and difficulty levels are dependent on the individual's ability and preference. Home visits and follow-up phone calls are completed according to a predefined schedule. Participants are permitted to attend further exercises groups, undertake other activities or seek further health care during the duration of the trial which are beyond the scope of the RCT. Details are recorded during assessments (T2, T3) but no additional assistance is provided by the research staff. | The control group receives a single home visit and are provided with written information about PA recommendations only.<br><br>Participants are permitted to attend exercises groups, undertake other activities or seek health care during the duration of the trial which are beyond the scope of the control group intervention. Details are recorded during assessments (T2, T3) but no additional assistance is provided by the research staff. |                                       |
| 7. Where             |                                      | The RCT is conducted as part of the PreventIT project (Early risk detection and prevention in ageing people by self-administered ICT-supported assessment and a behavioural change intervention, delivered by use of smartphones and smartwatches), a European Horizon2020 ICT and personal health project (project number 689238).The three participating clinical centres are Trondheim, Norway, Amsterdam, The Netherlands and Stuttgart, Germany.                                                                                                                                       |                                                                                                                                                                                                                                                                                                                                                                                                                                                      |                                       |
| 8. When and how much |                                      | <b>The aLiFE programme (experimental group 1)</b>                                                                                                                                                                                                                                                                                                                                                                                                                                                                                                                                           | <b>The eLiFE programme (experimental group 2)</b>                                                                                                                                                                                                                                                                                                                                                                                                    | <b>WHO guidelines (control group)</b> |
|                      | Home visits, Phone calls             | 6 home visits<br>3 phone calls                                                                                                                                                                                                                                                                                                                                                                                                                                                                                                                                                              | 4 home visits<br>3 phone calls                                                                                                                                                                                                                                                                                                                                                                                                                       | 1 home visit                          |
|                      | Active Intervention                  | 6 months                                                                                                                                                                                                                                                                                                                                                                                                                                                                                                                                                                                    | 6 months                                                                                                                                                                                                                                                                                                                                                                                                                                             | n/a                                   |

## Protocol paper: The PreventIT Feasibility RCT

|              |                             |                                                                                                                                                                                                                                     |                                                                                                                                                                                                                                                               |           |
|--------------|-----------------------------|-------------------------------------------------------------------------------------------------------------------------------------------------------------------------------------------------------------------------------------|---------------------------------------------------------------------------------------------------------------------------------------------------------------------------------------------------------------------------------------------------------------|-----------|
|              | period                      |                                                                                                                                                                                                                                     |                                                                                                                                                                                                                                                               |           |
|              | Passive follow-up period    | 6 months                                                                                                                                                                                                                            | 6 months                                                                                                                                                                                                                                                      | 12 months |
|              | Instructor main role        | Teach the programme                                                                                                                                                                                                                 | Teach how to use the PreventIT mHealth system                                                                                                                                                                                                                 | n/a       |
|              | Activities                  | Participants choose activities from the strength, balance and/or PA domain to integrate into their daily activities. The number of activities is individual and an activity planner and counter is used for documentation purposes. | The PreventIT mHealth system suggests a list of activities to participants ranked according to the expected level of benefit. Participants select their preferred activities from this list. The number of activities chosen is determined by the individual. | n/a       |
|              | Training goals              | Decided by the participants with help of a pre-specified list of possible goals                                                                                                                                                     | Participants select goals from a pre-specified list within the application                                                                                                                                                                                    | n/a       |
|              | Phenotyping tool            | Not used in aLiFE                                                                                                                                                                                                                   | Results from assessments (T1) are included in the PreventIT mHealth system for each participant individually prior to the first home visit to decide what to prioritise among the activities (balance, strength, or physical activity).                       | n/a       |
|              | Motivation                  | Provided by the instructor based individual progress (e.g. reviewing the activity planner during home visits)                                                                                                                       | Personalized motivational messages are displayed on the phone based on chosen activities and the reported adherence                                                                                                                                           | n/a       |
|              | Social interaction /Chat    | n/a                                                                                                                                                                                                                                 | Participants can use the platform "Slack" for group chat to anonymously communicate with other eLiFE participants at their clinical site.                                                                                                                     | n/a       |
| 9. Tailoring | aLiFE assessment tool (LAT) | The LAT is performed at the first home visit so the instructor can set the initial difficulty level on the balance and strength                                                                                                     | The LAT is performed at the first home visit, instructors manually add the results to the PreventIT mHealth system, and                                                                                                                                       | n/a       |

## Protocol paper: The PreventIT Feasibility RCT

|                  |             |                                                                                                                                                                                                                                                                                                                                                                                                                                                                                                                                                                                                                                                                                                                                                                                                                                                                |                                                                                                                                                                                                                                                                                                                                                                   |     |
|------------------|-------------|----------------------------------------------------------------------------------------------------------------------------------------------------------------------------------------------------------------------------------------------------------------------------------------------------------------------------------------------------------------------------------------------------------------------------------------------------------------------------------------------------------------------------------------------------------------------------------------------------------------------------------------------------------------------------------------------------------------------------------------------------------------------------------------------------------------------------------------------------------------|-------------------------------------------------------------------------------------------------------------------------------------------------------------------------------------------------------------------------------------------------------------------------------------------------------------------------------------------------------------------|-----|
|                  |             | activities                                                                                                                                                                                                                                                                                                                                                                                                                                                                                                                                                                                                                                                                                                                                                                                                                                                     | the system sets the initial difficulty level on the balance and strength activities                                                                                                                                                                                                                                                                               |     |
|                  | Progression | The instructor teaches the participants when to upgrade the number of activities and situations during the subsequent home visits                                                                                                                                                                                                                                                                                                                                                                                                                                                                                                                                                                                                                                                                                                                              | Participants can independently progress their activities based on the rule that the user has performed the activity each day for the last 7 days for at least 50% of the goal on average and at least 50% of the goal on each of the last three days.<br><br>The progression is not compulsory when a higher level becomes accessible.                            |     |
|                  | Feedback    | Feedback is provided by the instructor based on individual progress (reviewing the activity planner and counter) during home visits                                                                                                                                                                                                                                                                                                                                                                                                                                                                                                                                                                                                                                                                                                                            | Participants receive feedback on their PreventIT mHealth system<br><br>1. based on physical behaviour monitored by the smartphone and the smartwatch (time of PA and amount of sedentariness).<br><br>2. depending on the amount (type and dose) of strength and balance activities completed (in app adherence reporting) in relation to the intended type/dose. | n/a |
| 10. Modification | Super-user  | Participants are recommended to select activities which are challenging and relevant to the individual as identified using the LAT. As some participants reached Level 4 (highest level) on certain activities (mainly strength exercises) further 'upgrades' to the activities were offered. The superuser concept aims to further increase the task challenge (beyond Level 4) in order to ensure a training intensity which induces motor adaptations and clinically relevant improvements in functional performances. It includes elements of peak strain, slow motion (extended muscle loading), increased number of repetitions, differential training (learning through change/differences in movement variables e.g. joint angle/position), combining strength and balance activities, decreasing base of support and more complex sensorimotor tasks. |                                                                                                                                                                                                                                                                                                                                                                   | n/a |

**Protocol paper: The PreventIT Feasibility RCT**

|                        |                               |                                                                                                                                                                                                                                                                                                                                                                                            |                                                                                                                                                                     |     |
|------------------------|-------------------------------|--------------------------------------------------------------------------------------------------------------------------------------------------------------------------------------------------------------------------------------------------------------------------------------------------------------------------------------------------------------------------------------------|---------------------------------------------------------------------------------------------------------------------------------------------------------------------|-----|
|                        |                               | Participants are able to access the 'super-user' function for a specific activity after having performed the particular activity at 100% for 14 consecutive days.                                                                                                                                                                                                                          |                                                                                                                                                                     |     |
| 11. How well - planned | Participant Daily Adherence   | Daily adherence can be reported using the activity counters, with responses being dichotomous (completed, not completed)                                                                                                                                                                                                                                                                   | Daily adherence is reported on the PreventIT mHealth system which specifically asks about the planned/intended activities as previously defined by the participant. | n/a |
|                        | Participant Monthly adherence | Monthly adherence data is obtained via a web-link or via a postal question. Participants are asked if they completed all their activities/PA as intended in the last 7 days. The responses are: 1) yes, more than intended; 2) yes, as much as intended; 3) yes, but not as much as intended; 4) No, did not feel well; 5) No, forgot; 6) No, no time; 7) No, dislike of planned activity. |                                                                                                                                                                     |     |
|                        | Instructor fidelity           | Training is delivered independently in each of the three clinical sites. All instructors adhere to a single training protocol to ensure standardised delivery of the programme across sites. Training delivery was taught during a 3-day work shop with subsequent exam.                                                                                                                   |                                                                                                                                                                     |     |

n/a=not applicable, this intervention component is not available in this intervention arm/ control group; T1=Baseline assessment; T2=Assessment 6 months post-randomisation  $\pm$  2 weeks; T3=Assessment 12 months post-randomisation  $\pm$  4 weeks.

**eLiFE/aLiFE instructors**

The instructors follow an eLiFE and aLiFE instructor manual with topics to teach during each home visit/phone call. To ensure all clinical sites deliver the programme in a standardised manner, instructors attended a three-day workshop covering the **eLiFE and aLiFE concept**. aLiFE components including aims, activity principles, behavioural change concept, instructing and supporting the participants in action planning using the activity planner and activity counter, upgrading activities during subsequent home visits and phone calls, and safety principles were taught. The eLiFE concept included the same content as aLiFE and additionally, knowledge about the PreventIT mHealth system and how to instruct the participants to use the technology was included in the workshop. All instructors were tested and awarded certification prior to the start of the study, to ensure that they had the competences needed to deliver both the eLiFE and the aLiFE interventions.

**Control group**

**Protocol paper: The PreventIT Feasibility RCT**

The control group receives one home visit to provide them with a two-page written summary of the WHO recommendations of physical activity (54).

**Focus groups**

Semi-structured focus group interviews are conducted with a maximum of 10 participants of each intervention arms and control group at each site, after the post-test (T2) assessment. The topics to be discussed include: a) the recruitment process; b) the randomisation process; c) screening and assessments; d) home visits; e) the instructors; f) the tools used (paper-based and technology enabled); g) support in the intervention period; h) the activities undertaken; i) experience of the follow-up period; j) ideas for improvement. In addition, the eLiFE participants are asked to keep an “Issues log” to record issues and difficulties with the technology and on the trial procedure.

At the end of the trial, interviews with the assessors and the instructors will be performed. Interviews will be performed face-to-face, using a semi-structured interview guide. Topics to be discussed include: a) the recruitment process; b) the training received; c) successes and challenges in delivering the intervention; d) ideas for improvement. Focus groups and interviews are expected to last between 90-120 minutes. All focus groups and interviews are recorded using a digital voice recorder, transcribed, and translated into English prior to data analysis.

**Participant retention, adherence and drop-out**

Participants’ progression through the study phases is documented and presented in a CONSORT (55) flow diagram. Reasons for drop-out from the entire trial, or the intervention programme only, is recorded. In consenting to the trial, patients are consenting to the trial treatment, follow-up and data collection. If withdrawal from the randomly allocated treatment occurs, patients are still followed up if they consent. Patients are allowed to withdraw without giving a reason at any time and a withdrawal CRF is completed to document the date and reason (if known) for withdrawal. Data collected up to the time of withdrawal will be included in analyses unless the patient specifically asks for it to be withdrawn.

In all three study arms adherence to the intervention is measured monthly by use of a single question answerable via email or postcard (see details in Table 6). The intervention arms also report their exercise adherence on a daily basis through in-app reporting (eLiFE) or paper

## Protocol paper: The PreventIT Feasibility RCT

documentation (aLiFE: activity counter). Adherence measures are part of the study procedure as well as an outcome measure in this trial.

### Safety considerations and adverse events

Based on existing literature, the risk of adverse events during the eLiFE and aLiFE training is estimated to be low (17, 18). The safety aspect is emphasised in the eLiFE and aLiFE programmes, including the participants' manuals and smartphone app. Exercise training can have side effects and thus some adverse reactions such as muscle pain or adverse events like falls due to being more physically active in everyday life are expected. Several strategies have been incorporated in this trial to minimise the risk for study participants.

The number and description of adverse events that could be attributable to participation in the eLiFE or aLiFE programmes, that occur during the intervention and follow-up period are recorded. Participants are encouraged to report any adverse events and the medical responsible person at each site evaluates the need for further medical care. In case of any serious adverse event, participants are encouraged to seek appropriate medical advice/help. All adverse events are reported to the PreventIT Independent Data Monitoring Committee (IDMC) and will be reported in all publications arising from this project.

### Planned data analyses

A complete data analysis plan was finalised on October 3<sup>rd</sup> before the T2 assessments (at 6 months) started (accessible via first author).

The first analyses will be performed blinded to group allocation. It will be evaluated whether there is a pattern of missing data, and sensitivity analyses will be performed when missing data, collected via an assessor or using the smartphone, are judged not missing at random. Data at baseline will be analysed using descriptive statistics. The primary outcome measures will evaluate the change in function from baseline (T1) to follow-up (T3), for the eLiFE and the aLiFE interventions compared to the control group. Linear mixed-models will be used which will include factors for time point and study allocation, as well as their interaction, as independent variables. Within-subject baseline risk will be accounted for by including a subject-specific random intercept. Due to a limited number of centres (three), the centre effect will be treated as fixed rather than random, and included among the independent variables. Estimates of effect

**Protocol paper: The PreventIT Feasibility RCT**

1  
2  
3 sizes for the differences between eLiFE, aLiFE and control groups, and for changes within the  
4 eLiFE and aLiFE groups, will be provided as mean differences for the outcome variables. In case  
5 of non-normality, other appropriate models will be used. Results will be used to perform  
6 calculations of sample sizes to determine the optimal number of participants to be included when  
7 planning for a future final RCT to detect a real effect as statistically significant.  
8  
9

10  
11  
12 The analysis of change will be based on intention-to-treat, but a per protocol analysis will also be  
13 conducted as a sensitivity analysis as this is likely to provide further insight into the feasibility of  
14 the interventions.  
15  
16

17  
18 In order to determine a potential dose-response association between the adherence and outcome,  
19 the association between the two primary clinical outcomes, measured by LLFDI and activity  
20 monitoring (complexity metric), and the adherence measures collected (single question every  
21 four weeks to all participants in all three groups) will be assessed. Further subgroup analysis  
22 dependent on group allocation or adherence are described in detail in the analysis plan.  
23  
24

25  
26  
27 Multimodal analyses will be performed to calculate behavioural complexity using appropriate  
28 metrics such as Lempel-Ziv complexity (LZC). LZC determines the number of distinct temporal  
29 sequences of *multivariate physical activity states*, as well as the rate of their recurrence, with  
30 larger values indicating higher complexity of the given activity pattern (20). Data collected from  
31 the seven day activity monitoring will be processed offline making use of software developed in  
32 the FARSEEING project (<http://farseeingresearch.eu>) (43). A set of sensor-based physical  
33 activity features will be extracted from the signals, including the percentages of sedentary,  
34 active, and walking times, duration and intensity (metabolic equivalent) of the activities, and gait  
35 and turning characteristics. Combinations of these features will be used to define the  
36 multivariate states (20).  
37  
38  
39  
40  
41  
42  
43

44  
45 A further focus of the analyses will be on the willingness to participate, adherence to the  
46 interventions, and acceptance of the interventions, including the technology used to deliver the  
47 intervention and give feedback and motivation for behavioural change.  
48  
49

50  
51 Another focus will be to analyse the data collected by the technology to establish their  
52 reliability, to analyse participants' perception of which activities they have completed compared  
53 to what sensors have recorded as well as exploring additional metrics.  
54  
55  
56  
57  
58  
59  
60



## Protocol paper: The PreventIT Feasibility RCT

The health economics analysis will focus on the feasibility of collecting data on, and estimate, health care resource utilisation, costs and quality adjusted life years (QALYs), and model incremental cost-effectiveness ratios (ICERs) of eLiFE and aLiFE compared with the control group over a 6- and 12-month period in a standard within-trial evaluation model. EQ-5D-5L health utility scores will be used to calculate QALYs for economic evaluation. Published national unit costs will be used to calculate the total costs of resource utilisation.

This feasibility RCT is a hypothesis-generating study, where additional explorative analyses not described in this protocol paper or data analysis plan might be planned and performed.

### Data storing and security

Data are collected by the research staff, and from smartphones and smartwatches used by eLiFE participants. Data are stored in three different locations: in a web-based case report system (WebCRF), developed by NTNU, in the memories of the individual smartphones, and in an in-house protected server at NTNU. Participants' ID and identifiable information are kept locally and securely by recruiters at each site at all times. Data in the WebCRF and in the NTNU servers are pseudonymised. Only research staff directly involved in the analysis of the RCT will have access to the final trial dataset, which will only contain non-identifiable information.

The in-house web-server will be in a demilitarised zone (DMZ) and behind a firewall. Both the WebCRF and the data-servers will be behind a second firewall. Security and other ethical issues are priority, as sensor systems that monitor and report on health-related behaviours depend on the processing of personal data. All the data on the server are maintained in encrypted databases.

All data on smartphones are kept in encrypted databases. All transmission of data between the server and the smartphones is encrypted. Each phone/user is provided with an individual user login.

After the conclusion of the feasibility RCT, data will remain stored on the NTNU server in pseudonymised format using participant IDs. Coupling to personal IDs will be stored securely for five years after the end of the PreventIT project at each of the three sites. After this, data will be fully anonymised.

### Dissemination policy



**Protocol paper: The PreventIT Feasibility RCT**

We will seek to publish all results from the feasibility trial in open access, peer-reviewed international journals, and disseminated at scientific and non-scientific conferences and events. Main results will also be shared on the project website and spread to various stakeholders. Authorship eligibility will follow ICMJE (International Committee of Medical Journal Editors) (<http://www.icmje.org/recommendations/browse/roles-and-responsibilities/defining-the-role-of-authors-and-contributors.html>).

**Patient and public involvement**

Prior to commencing this feasibility RCT pilot studies were conducted for both the eLiFE and the aLiFE intervention mode. The pilot studies provided knowledge about the practical execution on collecting the relevant outcome measures, and to improve the interventions components, with a focus on the feasibility and acceptability of the balance, strength and PA activities. The eLiFE intervention was further tested for usability and acceptability within the target group. Focus groups were conducted during the pilot studies, providing insight into participants' priorities, experience and preferences. There are no patient advisers in the study, as the aim is to conduct a feasibility RCT and not a final RCT.

Following the participants final assessment (T3) all participants will get individual, written results from their participation providing them with an overview of the study status and their personal results regarding physical outcome measures and the 7-day consecutive PA monitoring.

**RESULTS**

In total 7500 persons between 61 and 70 years of age were drawn from the local registries in Norway, Germany, and the Netherlands. 2000 letters in Trondheim, 1500 letters in Stuttgart, and 4000 letters in Amsterdam were sent. Following the three step screening process, 180 participants were successfully enrolled into the study, accepted randomisation and completed their first home visit. The flow of participants from recruitment until randomisation is shown in Figure 2.

**DISCUSSION**

The current study is designed to evaluate the feasibility of conducting a randomised controlled trial of a life-style integrated intervention delivered in two modes, aLiFE (an instructor-

**Protocol paper: The PreventIT Feasibility RCT**

delivered, paper-based intervention) and eLiFE (a newly developed intervention using a mobile health application system) compared to simply being given guidelines on activity requirements. Both interventions entail embedding activities into daily life, strengthened by a behavioural change model aimed at making the activities habitual. This study further develops and adapts the LiFE programme to suit a younger population of seniors, at retirement age (61-70 years). Particularly at time of retirement, LiFE-based interventions may be beneficial to young older adults by specifically completing lower extremity muscle strengthening and balance activities as well as increasing physical activity to avoid later age-related functional decline. In comparison to traditional exercise programmes, such as group training and gym workouts where one needs to set aside dedicated time to follow the programme, LiFE-based programmes embed small bouts of activities into the individual's routines that are already part of their daily life. This individual tailoring of exercises, and embedding them into daily routines, seems to be a promising approach to keep young older adults active (56).

Capitalising on the benefits of technological advances and embedding the concept into a mobile health application system, aLiFE was transferred to an ICT-platform to create eLiFE using smartphones and smartwatches, commonly available technology already in use in this target population. There is a rapid development in mobile health application technology, with numerous health applications currently available. Application systems may motivate persons to be more physically active, provide opportunities to personalise interventions, provide feedback to the person using the technology, and help people keep track of their physical activities. Despite this potential, there is at present a lack of systems developed based on existing knowledge from research on exercise programmes and behavioural change, and tailored for use in young older (61-70 years) adults. The current trial will provide data on feasibility and usability of both the mobile health application in eLiFE and the instructor-delivered aLiFE. The aim is that the interventions can empower this population to maintain or increase their activity levels, so that they can stay active and healthy longer at advancing age. The study will provide more knowledge about how to integrate demanding activities into daily life and how to deliver an intervention to young older adults in order to increase their daily physical activity.

Finally, it is challenging to recruit a target population of young older adults without current signs of functional decline. Understanding how to recruit this specific population will aid in providing recommendations for a future RCT.

**Protocol paper: The PreventIT Feasibility RCT****Conclusions**

It is expected that both eLiFE and aLiFE have the potential to provide effective means to increase physical activity and complexity, improve functional capacity and change behaviour in young older adults. By using technology in eLiFE, it is expected that the behavioural change aspects of the aLiFE intervention are strengthened. It is also expected that an intervention that embeds more activity into daily life has the potential to empower young older adults to stay active at older age and therefore has the potential to reduce the risk of future functional decline.

**Ethics and dissemination**

The study and methods were evaluated and approved by the ethical committees in Norway (REK midt, 2016/1891), Stuttgart (registration number 770/2016BO1), and Amsterdam (METc VUmc registration number 2016.539 (NL59977.029.16)). The study has approvals to send invitation letters based on data from local/national registries.

**Trial status**

The trial commenced recruitment in March 2017. In August 2017, 180 participants were included in the trial.

**Protocol paper: The PreventIT Feasibility RCT****Acknowledgements**

We thank the ongoing support of participants, research staff, coordinators, data managers and other site staff who have been responsible for setting up the trial, recruiting participants, and collecting data.

**Declaration of interests:** There are no competing interests.

**Funding statement:** The feasibility RCT is part of the EU funded project “PreventIT” (2016-2018, grant number 689238) responding to the Horizon 2020, Personalised Health and Care call PHC-21: Advancing active and healthy aging with ICT: Early risk detection and intervention. The PreventIT project focuses on a new behaviour change activity approach for young older adults (61-70 years of age) with an overall aim to shift focus from treatment of conditions and diseases to early prevention and to empower people to take care of their own health.

The EU was not actively responsible or involved in the study design, collection, management, analysis or interpretation of data. The writing of reports and the decision to submit for publication is not authorised by the EU.

**Data sharing statement:** The PreventIT consortium intends to make data available for data sharing after the data collection has been completed and the primary papers are published.

**Authors’ contributions:** The PreventIT consortium led the conception and design of the study. All authors made substantial contribution to the concept and design of the study. KT wrote the first draft of the protocol manuscript. KT, BV, JLH, and ASM critically reviewed the protocol

**Protocol paper: The PreventIT Feasibility RCT**

manuscript with input from all co-authors. All authors approved the final version of the document.

**References**

1. EU O. Health at a Glance: Europe 2014.ed2014.
2. Chatterji S, Byles J, Cutler D, Seeman T, Verdes E. Health, functioning, and disability in older adults--present status and future implications. *Lancet*. 2015;385(9967):563-75.
3. Rechel B, Doyle Y, Grundy E, McKee M. How can health systems respond to population ageing? [http://www.euro.who.int/\\_\\_data/assets/pdf\\_file/0004/64966/E92560.pdf](http://www.euro.who.int/__data/assets/pdf_file/0004/64966/E92560.pdf) 2009.
4. American College of Sports M, Chodzko-Zajko WJ, Proctor DN, Fiatarone Singh MA, Minson CT, Nigg CR, et al. American College of Sports Medicine position stand. Exercise and physical activity for older adults. *Med Sci Sports Exerc*. 2009;41(7):1510-30.
5. Dawe RJ, Leurgans SE, Yang J, Bennett JM, Hausdorff JM, Lim AS, et al. Association between Quantitative Gait and Balance Measures and Total Daily Physical Activity in Community-Dwelling Older Adults. *J Gerontol A Biol Sci Med Sci*. 2017.
6. WorldHealthOrganization. Global recommendations on physical activity for health. 2011.
7. Olesen K, Rod NH, Madsen IE, Bonde JP, Rugulies R. Does retirement reduce the risk of mental disorders? A national registry-linkage study of treatment for mental disorders before and after retirement of 245,082 Danish residents. *Occup Environ Med*. 2015;72(5):366-72.
8. Landi F, Calvani R, Tosato M, Martone AM, Fusco D, Sisto A, et al. Age-Related Variations of Muscle Mass, Strength, and Physical Performance in Community-Dwellers: Results From the Milan EXPO Survey. *Journal of the American Medical Directors Association*. 2017;18(1):88 e17-88 e24.
9. Hawley-Hague H, Horne M, Campbell M, Demack S, Skelton DA, Todd C. Multiple levels of influence on older adults' attendance and adherence to community exercise classes. *Gerontologist*. 2014;54(4):599-610.
10. Nyman SR, Victor CR. Older people's recruitment, sustained participation, and adherence to falls prevention interventions in institutional settings: a supplement to the Cochrane systematic review. *Age Ageing*. 2011;40(4):430-6.
11. Mikolaizak AS, Lord SR, Tiedemann A, Simpson P, Caplan G, Bendall JC, et al. Adherence to a multifactorial fall prevention program following paramedic care: Predictors and impact on falls and health service use. Results from an RCT a priori subgroup analysis. *Australas J Ageing*. 2017.
12. French DP, Olander EK, Chisholm A, Mc Sharry J. Which behaviour change techniques are most effective at increasing older adults' self-efficacy and physical activity behaviour? A systematic review. *nn Behav Med*. 2014;48(2):225-34.

**Protocol paper: The PreventIT Feasibility RCT**

13. Murray JM, Brennan SF, French DP, Patterson CC, Kee F, Hunter RF. Effectiveness of physical activity interventions in achieving behaviour change maintenance in young and middle aged adults: A systematic review and meta-analysis. *Soc Sci Med*. 2017;192:125-33.
14. Strigglebout M, Hopman-Rock M, Crone M, Lecher L, van Mechelen W. Predicting older adults' maintenance in exercise participation using an integrated social psychological model. *Health Education Research* 2006.
15. Devereux-Fitzgerald A, Powell R, Dewhurst A, French DP. The acceptability of physical activity interventions to older adults: A systematic review and meta-synthesis. *Soc Sci Med*. 2016;158:14-23.
16. Jonkman NH, Del Panta V, Hoekstra T, Colpo M, van Schoor NM, Bandinelli S, et al. Predicting Trajectories of Functional Decline in 60- to 70-Year-Old People. *Gerontology*. 2017.
17. Clemson L, Singh MF, Bundy A, Cumming RG, Weisell E, Munro J, et al. LiFE Pilot Study: A randomised trial of balance and strength training embedded in daily life activity to reduce falls in older adults. *Australian occupational therapy journal*. 2010;57(1):42-50.
18. Clemson L, Fiatarone Singh MA, Bundy A, Cumming RG, Manollaras K, O'Loughlin P, et al. Integration of balance and strength training into daily life activity to reduce rate of falls in older people (the LiFE study): randomised parallel trial. *BMJ*. 2012;345:e4547.
19. Campbell M, Fitzpatrick R, Haines A, Kinmonth AL, Sandercock P, Spiegelhalter D, et al. Framework for design and evaluation of complex interventions to improve health. *BMJ*. 2000;321(7262):694-6.
20. Paraschiv-Ionescu A, Perruchoud C, Buchser E, Aminian K. Barcoding human physical activity to assess chronic pain conditions. *PLoS One*. 2012;7(2):e32239.
21. Kraft KP, Steel KA, Macmillan F, Olson R, Merom D. Why few older adults participate in complex motor skills: a qualitative study of older adults' perceptions of difficulty and challenge. *BMC Public Health*. 2015;15:1186.
22. Clemson L, Munro J. Conceptual model of habit reforming to improve balance and prevent falls. In: Pachana NA, editor. *Encyclopaedia of Geropsychology*. 1. Singapore: Springer; 2016. p. 1-10.
23. Michie S, Richardson M, Johnston M, Abraham C, Francis J, Hardeman W, et al. The behavior change technique taxonomy (v1) of 93 hierarchically clustered techniques: building an international consensus for the reporting of behavior change interventions. *nn Behav Med*. 2013;46(1):81-95.
24. Helbostad JL, Vereijken B, Becker C, Todd C, Taraldsen K, Pijnappels M, et al. Mobile Health Applications to Promote Active and Healthy Ageing. *Sensors*. 2017;17(3).
25. Stensvold D, Viken H, Rognmo O, Skogvoll E, Steinshamn S, Vatten LJ, et al. A randomised controlled study of the long-term effects of exercise training on mortality in elderly people: study protocol for the Generation 100 study. *BMJ open*. 2015;5(2):e007519.
26. Arain M, Campbell MJ, Cooper CL, Lancaster GA. What is a pilot or feasibility study? A review of current practice and editorial policy. *BMC medical research methodology*. 2010;10:67.
27. Browne RH. On the use of a pilot sample for sample size determination. *Stat Med*. 1995;14(17):1933-40.
28. Billingham SA, Whitehead AL, Julious SA. An audit of sample sizes for pilot and feasibility trials being undertaken in the United Kingdom registered in the United Kingdom Clinical Research Network database. *BMC medical research methodology*. 2013;13:104.
29. Nasreddine ZS, Phillips NA, Bedirian V, Charbonneau S, Whitehead V, Collin I, et al. The Montreal Cognitive Assessment, MoCA: a brief screening tool for mild cognitive impairment. *J Am Geriatr Soc*. 2005;53(4):695-9.

**Protocol paper: The PreventIT Feasibility RCT**

30. Jette AM, Haley SM, Coster WJ, Kooyoomjian JT, Levenson S, Heeren T, et al. Late life function and disability instrument: I. Development and evaluation of the disability component. *J Gerontol A Biol Sci Med Sci*. 2002;57(4):M209-16.
31. Haley SM, Jette AM, Coster WJ, Kooyoomjian JT, Levenson S, Heeren T, et al. Late Life Function and Disability Instrument: II. Development and evaluation of the function component. *J Gerontol A Biol Sci Med Sci*. 2002;57(4):M217-22.
32. Paraschiv-Ionescu A, Perruchoud C, Rutschmann B, Buchser E, Aminian K. Quantifying dimensions of physical behavior in chronic pain conditions. *J Neuroeng Rehabil*. 2016;13(1):85.
33. Podsiadlo D, Richardson S. The timed "Up & Go": a test of basic functional mobility for frail elderly persons. *Journal of the American Geriatrics Society*. 1991;39(2):142-8.
34. Mellone S, Tacconi C, Chiari L. Validity of a Smartphone-based instrumented Timed Up and Go. *Gait Posture*. 2012;36(1):163-5.
35. Rikli R, Jones CJ. *Senior Fitness Test Manual*. Champaign: Human Kinetics; 2001.
36. Farrar JT, Young JP, Jr., LaMoreaux L, Werth JL, Poole RM. Clinical importance of changes in chronic pain intensity measured on an 11-point numerical pain rating scale. *Pain*. 2001;94(2):149-58.
37. Radloff LS. The CES-D scale: a self-report depression scale for research in the general population. *Applied Psychological Measurement*. 1977;1:385-401.
38. Kempen GI, Yardley L, van Haastregt JC, Zijlstra GA, Beyer N, Hauer K, et al. The Short FES-I: a shortened version of the falls efficacy scale-international to assess fear of falling. *Age Ageing*. 2008;37(1):45-50.
39. Yardley L, Beyer N, Hauer K, Kempen G, Piot-Ziegler C, Todd C. Development and initial validation of the Falls Efficacy Scale-International (FES-I). *Age Ageing*. 2005;34(6):614-9.
40. Guralnik JM, Simonsick EM, Ferrucci L, Glynn RJ, Berkman LF, Blazer DG, et al. A short physical performance battery assessing lower extremity function: association with self-reported disability and prediction of mortality and nursing home admission. *The Journal of Gerontology*. 1994;49(2):M85-94.
41. Coppin AK, Shumway-Cook A, Saczynski JS, Patel KV, Ble A, Ferrucci L, et al. Association of executive function and performance of dual-task physical tests among older adults: analyses from the InChianti study. *Age Ageing*. 2006;35(6):619-24.
42. Balasubramanian CK. The community balance and mobility scale alleviates the ceiling effects observed in the currently used gait and balance assessments for the community-dwelling older adults. *Journal of geriatric physical therapy*. 2015;38(2):78-89.
43. Tacconi C, Mellone S, Chiari L. UADL: A smartphone application for ubiquitous activity of daily living monitoring with real-time parameter computation [Presentation at the 2015 World Congress of the International Society of Posture and Gait Research, Sevilla, Spain]. In press 2015.
44. Group TE. EuroQol - a new facility for the measurement of health-related quality of life *Health Policy*. 1990;16(3):199-208.
45. Ware J, Jr., Kosinski M, Keller SD. A 12-Item Short-Form Health Survey: construction of scales and preliminary tests of reliability and validity. *Med Care*. 1996;34(3):220-33.
46. Newman-Beinart NA, Norton S, Dowling D, Gavriloff D, Vari C, Weinman JA, et al. The development and initial psychometric evaluation of a measure assessing adherence to prescribed exercise: the Exercise Adherence Rating Scale (EARS). *Physiotherapy*. 2017;103(2):180-5.
47. Gardner B, Abraham C, Lally P, de Bruijn GJ. Towards parsimony in habit measurement: testing the convergent and predictive validity of an automaticity subscale of the Self-Report Habit Index. *The international journal of behavioral nutrition and physical activity*. 2012;9:102.



**Protocol paper: The PreventIT Feasibility RCT**

- 1
  - 2
  - 3
  - 4
  - 5
  - 6
  - 7
  - 8
  - 9
  - 10
  - 11
  - 12
  - 13
  - 14
  - 15
  - 16
  - 17
  - 18
  - 19
  - 20
  - 21
  - 22
  - 23
  - 24
  - 25
  - 26
  - 27
  - 28
  - 29
  - 30
  - 31
  - 32
  - 33
  - 34
  - 35
  - 36
  - 37
  - 38
  - 39
  - 40
  - 41
  - 42
  - 43
  - 44
  - 45
  - 46
  - 47
  - 48
  - 49
  - 50
  - 51
  - 52
  - 53
  - 54
  - 55
  - 56
  - 57
  - 58
  - 59
  - 60
48. Schwarzer R, Luszczynska A. Predicting Health Behaviours. Health Action Process Approach. In M. Conner PNE, editor. Maidenhead, UK: : McGraw Hill Open University Press; 2015.
49. Brooke J. A quick and dirty usability scale. . Usability evaluation in industry 1996;189(194):4-7.
50. Chiari L, van Lummel R, Becker C, Pfeiffer K, Lindemann U, Zijlstra W. Deliverable 2.2: Classification of the user's needs, characteristics and scenarios - update. 2009.
51. consortium P. Feasibility of the adapted LiFE (aLiFE) intervention – a pilot study <http://www.isrctn.com/ISRCTN377506052016> [
52. Stiggelbout M, Hopman-Rock M, Crone M, Lechner L, van Mechelen W. Predicting older adults' maintenance in exercise participation using an integrated social psychological model. Health Educ Res. 2006;21(1):1-14.
53. Prochaska JO, DiClemente CC. Stages and processes of self-change of smoking: toward an integrative model of change. J Consult Clin Psychol. 1983;51(3):390-5.
54. WHO. [http://apps.who.int/iris/bitstream/10665/44399/1/9789241599979\\_eng.pdf](http://apps.who.int/iris/bitstream/10665/44399/1/9789241599979_eng.pdf) [
55. Schulz KF, Altman DG, Moher D, Group C. CONSORT 2010 statement: updated guidelines for reporting parallel group randomised trials. BMJ. 2010;340:c332.
56. Weber M, Belala N, Clemson L, Boulton E, Hawley-Hague H, Becker C, et al. Feasibility and Effectiveness of Intervention Programmes Integrating Functional Exercise into Daily Life of Older Adults: A Systematic Review. Gerontology. 2017.



**Protocol paper: The PreventIT Feasibility RCT****Figure legends**

**Figure 1.** The architecture of the eLiFE system. Physical behaviour is continuously monitored by a smartphone and a smartwatch, connected through a Blue-tooth. The same units are also used for delivering the intervention. Data are calculated and stored locally on the smartphone and then sent to a cloud-based server for further processing and storing. The collected information is sent back to the smartphones in the form of motivational messages and feedback on behaviour.

**Figure 2.** PreventIT Flow Diagram

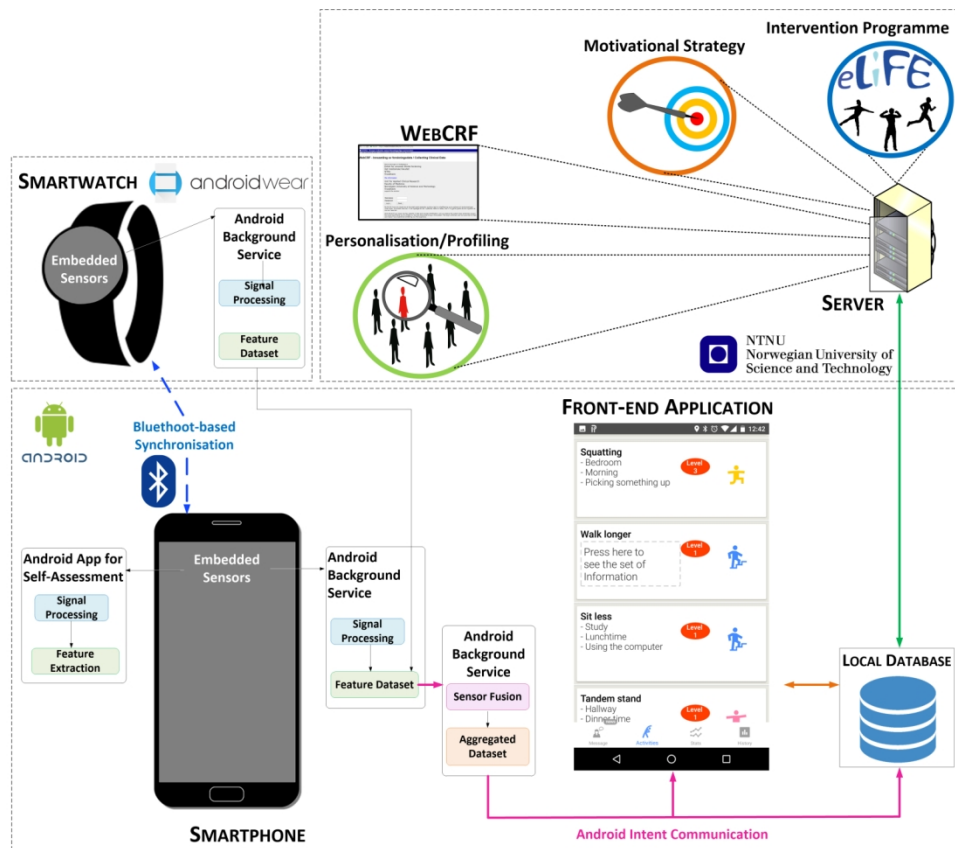

Figure 1. The architecture of the eLiFE system. Physical behaviour is continuously monitored by a smartphone and a smartwatch, connected through a Blue-tooth. The same units are also used for delivering the intervention. Data are calculated and stored locally on the smartphone and then sent to a cloud-based server for further processing and storing. The collected information is sent back to the smartphones in the form of motivational messages and feedback on behaviour.

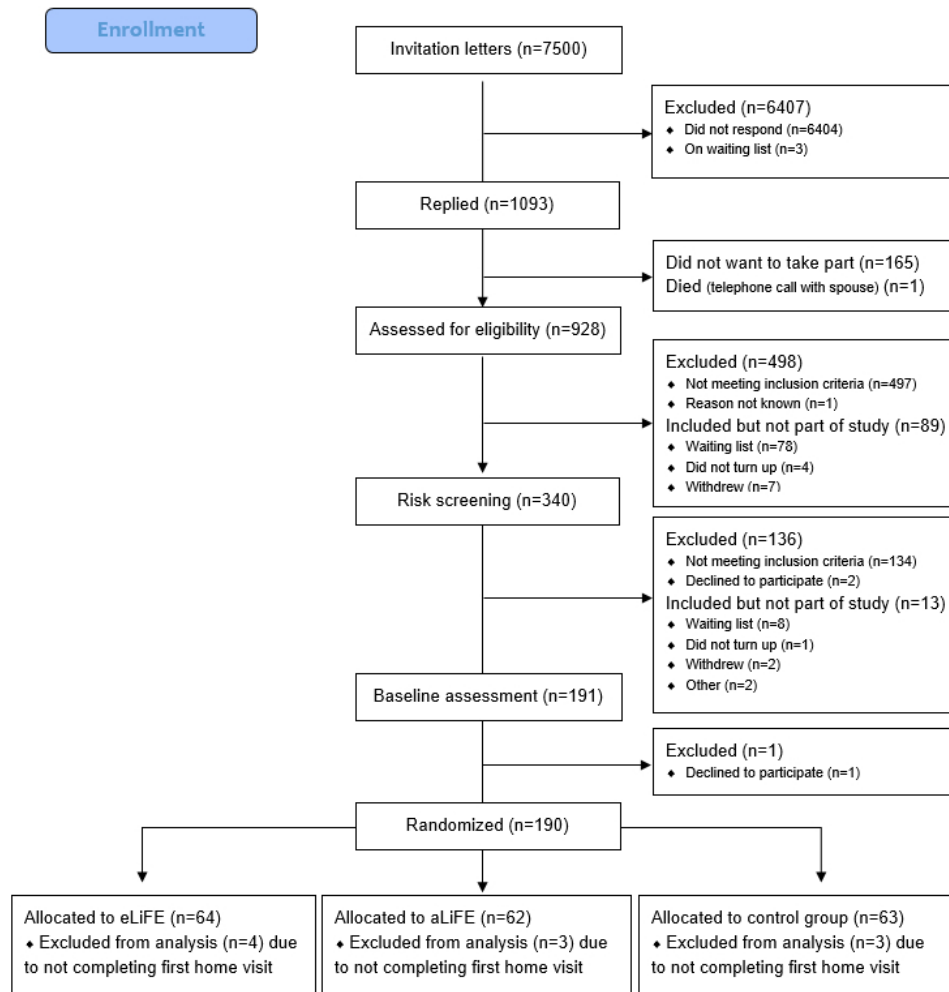

Figure 2. PreventIT Flow Diagram

# BMJ Open

## Protocol for the PreventIT randomised controlled trial feasibility study of a lifestyle-integrated exercise intervention in young older adults

|                               |                                                                                                                                                                                                                                                                                                                                                                                                                                                                                                                                                                                                                                                                                                                                                                                                                                                                                                                                                                                                                                                                                                                                                                                                                                                                                                                                                                                                                                                                                                                                                                                                                                                                                                                                                                                                                                                                                                                                                                                                                                                                                  |
|-------------------------------|----------------------------------------------------------------------------------------------------------------------------------------------------------------------------------------------------------------------------------------------------------------------------------------------------------------------------------------------------------------------------------------------------------------------------------------------------------------------------------------------------------------------------------------------------------------------------------------------------------------------------------------------------------------------------------------------------------------------------------------------------------------------------------------------------------------------------------------------------------------------------------------------------------------------------------------------------------------------------------------------------------------------------------------------------------------------------------------------------------------------------------------------------------------------------------------------------------------------------------------------------------------------------------------------------------------------------------------------------------------------------------------------------------------------------------------------------------------------------------------------------------------------------------------------------------------------------------------------------------------------------------------------------------------------------------------------------------------------------------------------------------------------------------------------------------------------------------------------------------------------------------------------------------------------------------------------------------------------------------------------------------------------------------------------------------------------------------|
| Journal:                      | <i>BMJ Open</i>                                                                                                                                                                                                                                                                                                                                                                                                                                                                                                                                                                                                                                                                                                                                                                                                                                                                                                                                                                                                                                                                                                                                                                                                                                                                                                                                                                                                                                                                                                                                                                                                                                                                                                                                                                                                                                                                                                                                                                                                                                                                  |
| Manuscript ID                 | bmjopen-2018-023526.R1                                                                                                                                                                                                                                                                                                                                                                                                                                                                                                                                                                                                                                                                                                                                                                                                                                                                                                                                                                                                                                                                                                                                                                                                                                                                                                                                                                                                                                                                                                                                                                                                                                                                                                                                                                                                                                                                                                                                                                                                                                                           |
| Article Type:                 | Protocol                                                                                                                                                                                                                                                                                                                                                                                                                                                                                                                                                                                                                                                                                                                                                                                                                                                                                                                                                                                                                                                                                                                                                                                                                                                                                                                                                                                                                                                                                                                                                                                                                                                                                                                                                                                                                                                                                                                                                                                                                                                                         |
| Date Submitted by the Author: | 12-Sep-2018                                                                                                                                                                                                                                                                                                                                                                                                                                                                                                                                                                                                                                                                                                                                                                                                                                                                                                                                                                                                                                                                                                                                                                                                                                                                                                                                                                                                                                                                                                                                                                                                                                                                                                                                                                                                                                                                                                                                                                                                                                                                      |
| Complete List of Authors:     | <p>Taraldsen, Kristin; Norwegian University of Science and Technology (NTNU), Department of Neuromedicine and Movement Science<br/> Mikolaizak, A. Stefanie; Robert Bosch Krankenhaus<br/> Maier, Andrea; Vrije Universiteit Amsterdam, Department of Human Movement Sciences<br/> Boulton, Elisabeth; University of Manchester, School of Health Sciences; Manchester Academic Health Science Centre<br/> Aminian, Kamiar; Ecole Polytechnique Federale de Lausanne<br/> van Ancum, Jeanine; Vrije Universiteit Amsterdam, Department of Human Movement Sciences<br/> Bandinelli, Stefania; Local Health Unit Toscana Center<br/> Becker, Clemens; RobertBoschKrankenhaus, Geriatric Medicine<br/> Bergquist, Ronny; Norwegian University of Science and Technology (NTNU), Department of Neuromedicine and Movement Science<br/> Chiari, Lorenzo; University of Bologna, Department of Electrical, Electronic and Information Engineering «Guglielmo Marconi»<br/> Clemson, Lindy; University of Sydney, Faculty of Health Sciences<br/> French, David; University of Manchester, School of Psychological Sciences<br/> Gannon, B; The University of Queensland, Centre for Business and Economics of Health<br/> Hawley-Hague, Helen; University of Manchester, School of Health Sciences<br/> Jonkman, Nini ; Vrije Universiteit Amsterdam, Department of Human Movement Sciences<br/> Mellone, Sabato; University of Bologna, Department of Electrical, Electronic and Information Engineering «Guglielmo Marconi»<br/> Paraschiv-Ionescu, Anisoara; Ecole Polytechnique Federale de Lausanne<br/> Pijnappels, Mirjam; Vrije Universiteit Amsterdam, Department of Human Movement Sciences<br/> Schwenk, Michael; Robert-Bosch Krankenhaus<br/> Todd, Chris; University of Manchester, School of Health Sciences<br/> Yang, Fan; University of York, Centre for Health Economics<br/> Zacchi, Anna; Doxee S.p.A<br/> Helbostad, Jorunn<br/> Vereijken, Beatrix; Norwegian University of Science and Technology (NTNU), Department of Neuromedicine and Movement Science</p> |
| <b>Primary Subject            | Medical education and training                                                                                                                                                                                                                                                                                                                                                                                                                                                                                                                                                                                                                                                                                                                                                                                                                                                                                                                                                                                                                                                                                                                                                                                                                                                                                                                                                                                                                                                                                                                                                                                                                                                                                                                                                                                                                                                                                                                                                                                                                                                   |

1  
2  
3  
4  
5  
6  
7  
8  
9  
10  
11  
12  
13  
14  
15  
16  
17  
18  
19  
20  
21  
22  
23  
24  
25  
26  
27  
28  
29  
30  
31  
32  
33  
34  
35  
36  
37  
38  
39  
40  
41  
42  
43  
44  
45  
46  
47  
48  
49  
50  
51  
52  
53  
54  
55  
56  
57  
58  
59  
60

|                            |                                                                                                        |
|----------------------------|--------------------------------------------------------------------------------------------------------|
| Heading                    |                                                                                                        |
| Secondary Subject Heading: | Evidence based practice, Public health, Sports and exercise medicine                                   |
| Keywords:                  | physical activity, muscle strength, balance, mobile health units, functional decline, behaviour change |
|                            |                                                                                                        |

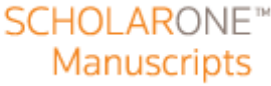

**Title:** Protocol for the PreventIT randomised controlled trial feasibility study of a lifestyle-integrated exercise intervention in young older adults

**Authors:** Kristin Taraldsen<sup>1\*</sup>, A. Stefanie Mikolaizak<sup>2\*</sup>, Andrea B. Maier<sup>3,4\*</sup>

\* Shared first authorship

**Elisabeth Boulton<sup>5</sup>; Kamiar Aminian<sup>6</sup>; Jeanine van Ancum<sup>3</sup>; Stefania Bandinelli<sup>7</sup>; Clemens Becker<sup>2</sup>; Ronny Bergquist<sup>1</sup>; Lorenzo Chiari<sup>8</sup>; Lindy Clemson<sup>9</sup>; David P. French<sup>5</sup>; Brenda Gannon<sup>10</sup>; Helen Hawley-Hague<sup>5</sup>; Nini H. Jonkman<sup>3</sup>; Sabato Mellone<sup>8</sup>; Anisoara Paraschiv-Ionescu<sup>6</sup>; Mirjam Pijnappels<sup>3</sup>; Michael Schwenk<sup>2</sup>; Chris Todd<sup>5</sup>; Fan Yang<sup>11</sup>; Anna Zacchi<sup>12</sup>; Jorunn L Helbostad<sup>1</sup>; Beatrix Vereijken<sup>1</sup>**

**Affiliations:**

<sup>1</sup>Department of Neuromedicine and Movement Science, The Faculty of Medicine and Health Sciences, The Norwegian University of Science and Technology, NTNU, Trondheim, Norway;

<sup>2</sup>Robert Bosch Krankenhaus, Department of Clinical Gerontology and Robert Bosch Medical Foundation, Stuttgart, Germany;

<sup>3</sup>Department of Human Movement Sciences, Faculty of Behavioural and Movement Sciences, Vrije Universiteit Amsterdam, Amsterdam Movement Sciences, The Netherlands;

<sup>4</sup>Department of Medicine and Aged Care, @AgeMelbourne, The Royal Melbourne Hospital, The University of Melbourne, Melbourne, Victoria, Australia;

<sup>5</sup>School of Health Sciences, Faculty of Biology, Medicine and Health, University of Manchester, Manchester UK and Manchester Academic Health Science Centre, and Manchester University NHS Foundation Trust, Manchester, UK;

<sup>6</sup>Laboratory of Movement Analysis and Measurement, Ecole Polytechnique Federale de Lausanne, Lausanne, Switzerland;

<sup>7</sup>Local Health Unit Toscana Center, Florence, Italy;

<sup>8</sup>Department of Electrical, Electronic and Information Engineering «Guglielmo Marconi» - University of Bologna, Bologna, Italy;

<sup>9</sup>The University of Sydney, Faculty of Health Sciences, Lidcombe, New South Wales, Australia

<sup>10</sup>Centre for Business and Economics of Health, University of Queensland, Australia;

<sup>11</sup>Centre for Health Economics, University of York, York, UK;

<sup>12</sup>Doxee S.p.A., Italy.

**Corresponding author:**

Kristin Taraldsen,

Department of Neuromedicine and Movement Science

Norwegian University of Science and Technology (NTNU)

Postal address:

Department of Neuromedicine and Movement Science,

NTNU, Faculty of Medicine and Health Sciences,

N-7491 Trondheim, Norway

E-mail: [Kristin.Taraldsen@ntnu.no](mailto:Kristin.Taraldsen@ntnu.no)

Telephone: +47 93 63 32 52

**Keywords:** Physical activity, muscle strength, balance, mobile health units, functional decline, behaviour change

**Word count, excluding title page, abstract, references, figures and tables: 5575**

**Issue date: 11.04.2018- original version**

**30.8.2018- revision 1, primary reason for amendment: revision and clarification for peer-reviewed publication.**

## Abstract

**Introduction:** The European population is rapidly ageing. In order to handle substantial future challenges in the health care system, we need to shift focus from treatment towards health promotion. The PreventIT project has adapted the lifestyle-integrated exercise programme (LiFE) and developed an intervention for healthy young older adults at risk of accelerated functional decline. The intervention targets balance, muscle strength and physical activity, and is delivered either via a smartphone application (eLiFE) or by use of paper manuals (aLiFE).

**Methods and analysis:** The PreventIT study is a multicentre, three-armed feasibility RCT, comparing eLiFE and aLiFE against a control group that receives international guidelines of physical activity, it is performed in three European cities in Norway, Germany, and The Netherlands. The primary objective is to assess the feasibility and usability of the interventions, and to assess changes in daily life function as measured by the Late-Life Function and Disability Instrument (LLFDI) scale and a physical behaviour complexity metric. Participants are assessed at baseline, after the six months intervention period, and at one year post-randomisation. Men and women between 61-70 years of age were randomly drawn from regional registries and respondents screened for risk of functional decline to recruit and randomise 180 participants (60 participants per study arm).

**Ethics and dissemination:** Ethical approval was received at all three trial sites. Baseline results are intended to be published by late 2018, with final study findings expected early 2019. Subgroup and further in-depth analyses will subsequently be published.

**Discussion:** Results will be used to improve lifestyle integrated activities targeting balance, muscle strength and physical activity for young older adults, to compare technological advances with traditional delivery of such an intervention, and to design a future definitive phase III RCT.

**Trial registration:** ClinicalTrials.gov, NCT03065088. Registered on 14 February 2017.



**Strengths and limitations of this study:**

- aLiFE integrates individualised and appropriately challenging balance, muscle strength, and physical activities into daily lives of young older adults.
- eLiFE uses a smartphone/smartwatch app to offer a personalised life-style integrated activity programme, based on a risk screening of future functional decline and an individuals' physical performance.
- Technology-supported exercise programme allows participants to monitor their behaviour and receive messages and feedback in real time aiming to change their physical behaviour.
- The twelve month follow-up enables monitoring and evaluation of long-term adherence to smartphone-based and paper-based interventions.
- Potential sources of bias include the selection of participants and loss to follow-up if those who complete the full data collection protocol are systematically different between the three groups.

## BACKGROUND

The European population is rapidly ageing. Average life expectancy has exceeded 80 years across Organisation for Economic Co-operation and Development (OECD) countries,(1) with a concomitant increase in projected years spent with disabilities.(2) In order to tackle future challenges on already overstretched health care systems, it is generally recognised that there needs to be shift of focus from treatment towards promoting active and healthy ageing and prevention of age-related diseases and functional decline.(3)

It is well documented that physical activity improves health and physical function and reduces disability at old age.(4) Increasing physical activity (4) as well as balance (5) and strength (5) training have been described as determinants for maintaining function and ability. According to the World Health Organisation (WHO), physical inactivity is the fourth leading risk factor contributing to death worldwide and increases the risk of adverse health outcomes, such as shortened life expectancy, cardiovascular disease, diabetes, and cancer.(6) Older adults are at increased risk of physical inactivity, with significant decline in activity levels occurring around the time of retirement.(7) Simultaneously, this period of life provides the opportunity to adopt a healthy and active lifestyle, as there is still potential to prevent decline and maintain physical function required to remain active and independent in later life.(8)

In order to shift from an inactive to an active lifestyle, behaviour change is needed. However, uptake of and adherence to physical activity interventions is a challenge, as shown for example in fall prevention (9) and evidence-based strength and balance programmes in older adults.(10) Previous studies demonstrated that high intervention adherence rates can achieve statistically significant and clinically relevant treatment effects.(11) However, participants' activity levels often revert back to previous low activity levels at the end of the intervention period,(12, 13) indicating that interventions must be supported by behavioural change, be acceptable, and be based on theoretical and empirically tested principles.(12, 14, 15)

The PreventIT project (Early risk detection and prevention in ageing people by self-administered ICT-supported assessment and a behavioural change intervention, delivered by use of smartphones and smartwatches), is a European Horizon 2020 ICT and personal health project. The aim is to develop and test a personalised behaviour change intervention on physical activity aimed at young older adults that has the potential to prevent accelerated functional decline at older age.(16)

PreventIT is based on the **LiFE programme** (Lifestyle-integrated Exercise programme) developed by Clemson et al.(17) In LiFE, balance and muscle strengthening activities are embedded within everyday activities. Rather than using a prescribed set of exercises, LiFE activities occur whenever the opportunity for such activity arises during the day. The original LiFE programme was developed for adults 70 years and older and tested in older home-dwelling people. It was found to significantly reduce falls, improve physical function, decrease disability and improve adherence, compared to a traditional exercise programme and a sham intervention.(18) Thus, tailoring exercise at an individual level and integrating it in daily life seems to be a promising approach.

In accordance with the UK Medical Research Council (MRC) guidance (19) on development, evaluation and implementation of complex interventions, the original LiFE programme was customised to the needs of a younger target group. The PreventIT consortium adapted and piloted the LiFE activities in order to make them adequately challenging, complex and meaningful for a younger target population (**aLiFE**) (paper submitted).(20, 21) In addition, the consortium further developed the behavioural change elements of the intervention,(22) mapping these to behaviour change theory and techniques (Table 1).(23) Iterative stages of feasibility testing and evaluation of the aLiFE programme were applied including a proof of concept pilot study (ISRCTN37750605 <https://doi.org/10.1186/ISRCTN37750605>). Subsequently, the aLiFE programme was transferred to a mobile health application system (PreventIT mHealth system),(24) called **eLiFE** (enhanced LiFE) programme, delivering the intervention on smartphones and smartwatches.

In order to assess feasibility and usability, evaluate and further improve the intervention, and to suggest sample size and design for a future Phase III clinical trial, this feasibility study is currently being conducted, comparing eLiFE and aLiFE interventions to a control group.

Table 1. Behaviour change techniques adopted within aLiFE and eLiFE

| Behaviour Change Techniques*                                          | aLiFE Content                          | eLiFE Content                               |
|-----------------------------------------------------------------------|----------------------------------------|---------------------------------------------|
| <b>1. Goals and planning</b>                                          |                                        |                                             |
| 1.1 Goal setting (behaviour – which activities, where and how often). | Daily Routine Chart, Activity Planner. | App content (planning screens), instructor. |

|                                                     |                                                             |                                                                       |
|-----------------------------------------------------|-------------------------------------------------------------|-----------------------------------------------------------------------|
| 1.2 Problem solving.                                | Manual, instructor.                                         | App content, instructor.                                              |
| 1.3 Goal setting (outcome – long term).             | Paper form, instructor.                                     | App content (planning screens), instructor.                           |
| 1.4 Action Planning.                                | Activity Planner, instructor.                               | App content (planning screens), instructor.                           |
| 1.5 Review behavioural goals.                       | Activity Planner, Activity Counter.                         | App content (daily reporting).                                        |
| 1.6 Discrepancy between current behaviour and goal. | Paper form, Activity Planner.                               | App content (motivational messaging, activity reporting).             |
| 1.7 Review outcome goals.                           | Paper form, Activity Planner, Activity Counter, instructor. | App content (motivational messaging, activity reporting).             |
| <b>2. Feedback and monitoring</b>                   |                                                             |                                                                       |
| 2.2 Feedback on behaviour.                          | Instructor.                                                 | App content (real-time feedback).                                     |
| 2.3 Self-monitoring of behaviour.                   | Activity Planner, Activity Counter.                         | App content (activity reporting).                                     |
| 2.4 Self-monitoring of outcomes of behaviour.       | Activity Planner, Activity Counter.                         | App content (motivational messaging).                                 |
| 2.6 Biofeedback                                     | Not included.                                               | System components (accelerometer) and app content (feedback screens). |
| 2.7 Feedback on outcomes of behaviour.              | Instructor.                                                 | App content (real-time feedback).                                     |
| <b>3. Social support</b>                            |                                                             |                                                                       |
| 3.1 Social support.                                 | Instructor.                                                 | App content (motivational messaging).                                 |
| <b>4. Shaping knowledge</b>                         |                                                             |                                                                       |
| 4.1 Instruction on how to perform the behaviour.    | Manual, instructor.                                         | App content (text, pictures, videos).                                 |
| <b>5. Natural consequences</b>                      |                                                             |                                                                       |
| 5.1 Information about health consequences.          | Manual.                                                     | App content (motivational messaging).                                 |
| 5.3 Information about social and                    | Manual.                                                     | App content (motivational                                             |

environmental consequences.

messaging).

## 6. Comparison of behaviour

6.1 Demonstrate the behaviour.

Manual (text, pictures),  
instructor.

App content (text, pictures,  
videos).

6.2 Social comparison.

Not included.

App content (motivational  
messaging).

6.3 Information about others'  
approval.

Not included.

App content (motivational  
messaging).

## 7. Associations

7.1 Prompts / cues.

Manual, instructor.

App content (planning screens).

## 8. Repetition and substitution

8.1 Behavioural practice/rehearsal.

Manual, instructor

App content (planning screens,  
real-time feedback, motivational  
messaging).

8.3 Habit formation.

Manual, instructor,  
Activity Planner, Activity  
Counter.

App content (planning screens,  
real-time feedback, motivational  
messaging).

8.6 Generalisation of a target  
behaviour.

Manual, instructor, Daily  
Routine Chart, Activity  
Planner.

App content (motivational  
messaging).

8.7 Graded tasks.

Manual, instructor.

App content (planning screens,  
real-time feedback, motivational  
messaging).

## 10. Reward and threat

10.10 Reward (outcome).

Instructor.

App content (real-time feedback,  
motivational messaging).

10.3 Non-specific reward.

Instructor.

App content (real-time feedback,  
motivational messaging).

## 12. Antecedents

12.1 Restructuring the physical  
environment.

Manual, instructor.

App content (planning screens,  
motivational messaging).

12.2 Restructuring the social  
environment.

Manual, instructor.

App content (planning screens,  
motivational messaging).

## 15. Self-belief

|                                          |               |                                       |
|------------------------------------------|---------------|---------------------------------------|
| 15.1 Verbal persuasion about capability. | Not included. | App content (motivational messaging). |
| 15.3 Focus on past success.              | Not included. | App content (motivational messaging). |

---

\*Using Michie et al, 2013 (23)

## Aims

The aim of the multicentre randomised controlled feasibility trial is to assess the feasibility of eLiFE and aLiFE programmes, integrating activities into daily life, versus a control group, targeting young older adults between 61-70 years. There are 5 main research questions: 1) **Participation:** What are the levels of adherence of young older adults to specific activities and to the entire eLiFE and aLiFE intervention over the course of the study period? 2) **Technology:** What is the acceptability of the eLiFE intervention delivered using technology (smartphones and smartwatches) including user interface, goal setting, feedback, motivational messages, and social interaction? 3) **Feasibility and usability:** What is the feasibility of the eLiFE and aLiFE intervention programmes in a cohort of young older adults: What are the possible harms (adverse events) of the eLiFE or aLiFE intervention? What is the acceptability of eLiFE and aLiFE activities (usefulness, safety, difficulty level, adaptability/personalisation, planning and uptake of exercises)? Are the RCT methods suitable (recruitment, randomisation, follow up, outcomes etc.)? 4) **Estimates of change:** What is the change in function, as measured by two primary clinical outcome measures: the Later Life Function and Disability Instrument (LLFDI) and the behavioural complexity metric, for the eLiFE and the aLiFE interventions compared to the control group? What are the estimated effect sizes for LLFDI, complexity metric, and the secondary clinical outcome measures? 5) **Health Economics Evaluation:** Is it feasible to collect data in order to estimate health care resource utilisation, costs and quality-adjusted life years (QALYs), and model incremental cost-effectiveness ratios (ICERs) of aLiFE and eLiFE compared with the control group over a 6-month and 12-month time period?

## METHODS

### Trial design

The study uses a three arm RCT design, performed at three clinical sites including a total of 180 participants (60 participants at each site; 20 participants in each arm per site). Inclusion of participants started in March 2017 with a 6-months intervention period and 12-month follow up from baseline lasting until August 2018.

### Study setting and test procedures

The three participating study sites are Trondheim, Norway; Amsterdam, The Netherlands; and Stuttgart, Germany. Telephone screening, risk screening, medical assessment as well as three on-site assessments (T1, T2, T3) are undertaken in university facilities (NTNU Trondheim and Vrije Universiteit Amsterdam) and academic hospital (Robert Bosch Krankenhaus, Stuttgart). All other participant contact is through home visits or telephone communication. Participants are assessed at baseline (T1) within 6 weeks of initial screening, post-test (T2) 182 days after the first home visit ( $\pm 2$  weeks), and follow-up after 12 months (T3) (364 days  $\pm 4$  weeks after the first home visit). Trained assessors (blinded to group allocation) perform all assessments at the collaborating centres. Each assessment lasts approximately 1.5 to 2.5 hours.

### Eligibility criteria

Persons born between 01/01/1947 and 31/12/1956 (61-70 years of age at recruitment begin) were invited to participate via mail. Persons within the target group were randomly selected from three local population registries (The National Registry in Norway, the Municipality Registry of Amsterdam, and the Stuttgart Registry in Germany). The inclusion and exclusion criteria are presented in Table 2. Eligibility for participation is determined through a telephone interview, a risk screening for functional decline, and a medical screening. Rates of eligibility at each stage of the inclusion process are monitored.

Table 2. Inclusion and exclusion criteria.

|                     | Inclusion criteria                | Exclusion criteria                                               |
|---------------------|-----------------------------------|------------------------------------------------------------------|
| Telephone screening | Between 61 and 70 years of age    | Current participation in an organised exercise class >1 per week |
|                     | Retired (more than 6 months, <50% | Moderate-intensity physical activity                             |

|                          |                                                  |                                                                                     |
|--------------------------|--------------------------------------------------|-------------------------------------------------------------------------------------|
|                          | paid/unpaid work)                                | ≥150 min/week in the previous 3 months                                              |
|                          | Community dwelling                               | Travels >2 months planned during intervention period                                |
|                          | Able to read a newspaper or text on a smartphone |                                                                                     |
|                          | Speaks Norwegian/Dutch/German                    |                                                                                     |
|                          | Able to walk 500 m without walking aid           |                                                                                     |
|                          | Available for home visits the following 6 weeks  |                                                                                     |
| <b>Risk screening</b>    | “At risk” for functional decline                 | Cognitive impairment (Montreal Cognitive Assessment, MOCA <24 points)               |
|                          |                                                  | Acute depression<br>(STU and AMS)                                                   |
| <b>Medical screening</b> |                                                  | Medical condition (heart failure New York Heart Association (NYHA) class III and IV |
|                          |                                                  | Acute myocardial infarction last 6 months or unstable angina                        |
|                          |                                                  | Pericarditis, myocarditis, endocarditis in the last 6 months                        |
|                          |                                                  | Symptomatic aortic stenosis; cardiomyopathy                                         |
|                          |                                                  | Resting blood pressures of a systolic >180 mmHg or diastolic >100 mmHg or higher    |
|                          |                                                  | Chronic Obstructive Pulmonary Disease (COPD) Gold class III and IV                  |
|                          |                                                  | Uncontrolled asthma at least 2 exacerbation in the last 6 months                    |
|                          |                                                  | Amputated lower extremities                                                         |
|                          |                                                  | Active cancer treatment during last 6 months                                        |
|                          |                                                  | Ankylosing spondylitis                                                              |
|                          |                                                  | History of schizophrenia                                                            |
|                          |                                                  | Parkinson’s disease                                                                 |
|                          |                                                  | Cerebrovascular accident last 6 months                                              |
|                          | Epilepsy treated with medication                 |                                                                                     |
|                          | Severe rheumatoid arthritis (RA) interfering     |                                                                                     |



|                         |  |                                                                                                     |
|-------------------------|--|-----------------------------------------------------------------------------------------------------|
|                         |  | with mobility                                                                                       |
|                         |  | Fracture of lumbar spinal vertebra/thoracic spinal vertebra or lower extremity in the last 6 months |
|                         |  | 3 fractures in the last 2 years due to severe osteoporosis                                          |
|                         |  | Acute depression (TRD)                                                                              |
| After screening process |  | Spouse/living together with an already included participant in this trial                           |

TRD: Clinical site Trondheim, STU: Clinical site Stuttgart, AMS: Clinical site Amsterdam

### Sample size and recruitment

No sample size calculation was performed for this study as it is a feasibility study not designed to conclude on effectiveness. However, based on a Norwegian population-based study (25) the sample size (n=180) is estimated to be large enough to estimate critical parameters (26), which equals twice the minimum required number of participants suggested (2x n=90) as a general rule to estimate a parameter.(27, 28)

Participants are drawn from the general population with the purpose of identifying those estimated to be at risk of accelerated functional decline. The number required to invite in order to reach 180 participants is not predefined, due to insufficient knowledge about ability/function in this age group and because the risk screening tools (see below) are newly developed.(16) A contact list was provided for home-dwelling individuals between 61 and 70 years of age living in Trondheim, Amsterdam, and Stuttgart, stratified by age and with even distribution of men and women in each age stratum. The initial draw from each local registry was set at 2000 persons, with the intention of performing a second draw if necessary.

### Screening

We recruited persons who actively replied to their respective study site by telephone or email following the mailing and invited them to undergo a multi-step screening. Screening started with a structured **telephone interview** to determine interest and eligibility, which amongst other criteria included being retired and currently not undertaking more than 150 min of moderate/vigorous physical activity per week (Table 2). Eligible participants are then invited

1  
2  
3 to an on-site risk screening and medical assessment (Table 2). All participants sign an  
4 informed consent form prior to commencing the on-site assessments.  
5

6 An online web-based tool developed through the PreventIT project, (**the PreventIT risk**  
7 **screening tool**), is used to identify participants' risk for functional decline.(16) This is a  
8 newly developed tool, where the risk for functional decline over the next nine years is  
9 estimated and participants are classified as being at "low risk", "medium risk", or "high risk".  
10 At time of commencing recruitment, the tool had not yet been validated. Initially only  
11 participants identified as being at "medium risk" were to be included in the study, as prior  
12 analyses in other cohort data indicated that this would be a third of potential participants.(16)  
13 The telephone screening, which preceded on-site screening and assessment, was designed to  
14 exclude the majority of 'low risk' participants. Subsequently applying the risk screening tool  
15 on the selected sample showed that only about 10% of individuals invited for face-to-face  
16 assessment are classified as 'medium risk' and hence eligible for inclusion. Therefore, the  
17 selection of participants based on the risk-screening tool was discontinued and the risk  
18 screening tool is now applied to estimate and describe the participants' specific risk for  
19 functional decline within the recruited cohort. Participants who complete the face-to-face risk  
20 screening and are not excluded due to cognitive impairment (MOCA >24),(29) are invited to  
21 a **medical screening** to ensure participation in an exercise intervention is not contraindicated.  
22 When all inclusion criteria are met, participants are invited to perform a **full baseline**  
23 **assessment** (T1).  
24  
25  
26  
27  
28  
29  
30  
31  
32  
33  
34  
35  
36

### 37 **Data collection and outcome measures**

38  
39 All eligible participants undergo a phone screening, risk screening, medical screening and  
40 three measurements: one at entry into the study (baseline assessment, T1), one after the 6-  
41 month intervention period (T2) and one after completing the 6 months passive follow-up  
42 period (12-months assessment, T3). Table 3 highlights the measures collected, Table 4  
43 provides a summary of the schedule of enrolment, interventions, and assessments, and Table 5  
44 provides an overview of intervention timeframe.  
45  
46  
47  
48

### 49 **Blinding**

50  
51 All pre-intervention measures are assessed by trained research staff and the medical screening  
52 by medically qualified members of the research teams at the respective sites prior to  
53 randomisation. Post-intervention measures are collected by personnel blinded to group  
54  
55  
56  
57  
58  
59  
60

1  
2  
3 allocation. Due to the nature of the intervention, it is not possible to blind participants or the  
4 instructors delivering the intervention. Outcome measures that identify group allocation (e.g.  
5 technology acceptability questionnaires) are collected by unblinded research staff.  
6  
7

### 8 **Outcome measures**

9

10 All outcome measures are listed in Table 3 and include socio-demographic data, outcomes  
11 regarding general health and function, medical history, medication use, neuropsychological  
12 assessments, measures of physical ability, and quality of life measures. Further data are  
13 collected for economic evaluation purposes. During the 12-month follow-up period monthly  
14 adherence rates are monitored and detailed information about adherence to the interventions is  
15 collected during the 6- (T2) and 12-months (T3) assessments. Experience with the  
16 programme, motivation and behaviour change outcome measures, as well as outcome  
17 measures regarding willingness to participate, usability of technology, and acceptability of the  
18 intervention are collected after the active (first 6 months) and passive follow up period  
19 (further 6 months).  
20  
21  
22  
23  
24  
25

26 Among all outcome measures, two are the primary clinical outcomes that are related to  
27 change in function (objective 4) and measured using the **Late-Life Function and Disability**  
28 **Instrument (LLFDI)** (30, 31) and a **complexity metric**,<sup>(20)</sup> further developed and adapted  
29 within the project to assess **behavioural complexity** in the domains of physical activity,  
30 sleep, and social participation.  
31  
32  
33  
34

35 The Late-Life Function and Disability Instrument (LLFDI) was developed as a  
36 comprehensive questionnaire assessing function and disability for use in community-dwelling  
37 older adults.<sup>(30, 31)</sup> The LLFDI contains items that represent functional limitations (inability  
38 to perform discreet physical tasks encountered in daily routines) and disability (inability to  
39 take part in major life tasks and social roles). The LLFDI assesses function in 32 physical  
40 activities (in three dimensions: upper extremity, basic lower extremity, and advanced lower  
41 extremity) and disability in 16 major life tasks.  
42  
43  
44  
45  
46

47 Physical activity and sleep data are collected via physical activity monitoring. After each  
48 measurement point (T1, T2, T3), participants' physical activity is monitored for 7 consecutive  
49 days using activity monitors at the lower back (fixed using adhesive tape) and the wrist (fixed  
50 in an elastic wrist band) (AX3 sensors from Axivity: <http://axivity.com/product/ax3>).  
51 Assessment on social interaction is based on detection of outdoor walking derived from the  
52 timing and the number of steps of walking episodes. Frequency and number of SMSs and  
53  
54  
55  
56  
57  
58  
59  
60

1  
2  
3 phone calls and GPS statistics are also used as possible social interaction measures. These  
4 statistics are anonymous, without identifying the caller/sender. Data on physical behaviour are  
5 represented as time series embedding fundamental activity characteristics (i.e., type, duration,  
6 and intensity). The concept of **complexity** in physical behaviour postulates that high  
7 functional status is characterised by freedom of movement in terms of flexibility, ability to  
8 successfully achieve daily tasks, physical performance, diversity of activities, and  
9 participation in social life. On the other hand, advanced ageing and age-related adverse events  
10 may be characterised by progressive movement impairment, difficulties with daily tasks, and  
11 limitation of activities and social life, i.e., less complex physical behaviour.(32)

12  
13  
14 As part of the on-site assessments, *self-administered tests* of mobility, balance and functional  
15 strength are used, where participants use a smartphone app to perform the “Timed Up and  
16 Go”,(33) “Tandem stance, eyes open”, and “Five times sit-to-stand” tests by following  
17 instructions in the app, with no additional guidance from the assessor. This test battery is  
18 developed as part of the PreventIT project, and the acceptance of self-administered tests will  
19 be evaluated. The smartphone is worn in an elastic band around the participant’s waist during  
20 the self-administered tests, from which parameters such as sit-to-stand duration, jerk during  
21 sit-to-stand, mean step time, variability of step time, and interstride trunk sway in anterior-  
22 posterior and medio-lateral directions can be obtained.(34) Participants also perform assessor-  
23 guided versions of the Timed Up and Go, Tandem stance (eyes open and closed), Five times  
24 sit-to-stand, and the 30-second chair stand test originally from the Senior Fitness Test,(35)  
25 during which the participants ‘wears’ the smartphone to record movement parameters as  
26 during the self-administered tests.

1  
2  
3  
4  
5  
6  
7  
8  
9  
10  
11  
12  
13  
14  
15  
16  
17  
18  
19  
20  
21  
22  
23  
24  
25  
26  
27  
28  
29  
30  
31  
32  
33  
34  
35  
36  
37  
38  
39  
40  
41  
42  
43  
44  
45  
46  
47

Table 3. List of assessments and outcome measures collected during telephone screening, risk screening, medical screening, baseline assessment, after 6 months active intervention and further 6 months passive follow up.

|                                                                                                                                                                                                                                                                                                              | TS | RS | MS | T1 | T2 | T3 | O        |
|--------------------------------------------------------------------------------------------------------------------------------------------------------------------------------------------------------------------------------------------------------------------------------------------------------------|----|----|----|----|----|----|----------|
| <b>Socio demographic</b>                                                                                                                                                                                                                                                                                     |    |    |    |    |    |    |          |
| Age, gender, employment status, living arrangements (community-dwelling or residential aged care facility), number of co-habitants, years of education                                                                                                                                                       | ✓  |    |    |    |    |    | —        |
| Economic satisfaction (good, sufficient, bad/poor)                                                                                                                                                                                                                                                           |    | ✓  |    |    |    |    | —        |
| Prior experience with using smartphone technology (yes/no)                                                                                                                                                                                                                                                   |    |    |    | ✓  |    |    | —        |
| <b>General health and function</b>                                                                                                                                                                                                                                                                           |    |    |    |    |    |    |          |
| Ability to walk 500m without walking aid                                                                                                                                                                                                                                                                     | ✓  |    |    |    |    |    | —        |
| Ability to read newspaper in print and on a smartphone                                                                                                                                                                                                                                                       | ✓  |    |    |    |    |    | —        |
| Participation in an organised exercise group > 1 per week (yes/no)                                                                                                                                                                                                                                           | ✓  |    |    |    | ✓  | ✓  | <b>S</b> |
| Currently undertaking 150 minutes or more in moderate-intensity PA per week (yes/no)                                                                                                                                                                                                                         | ✓  |    |    |    | ✓  | ✓  | <b>S</b> |
| Amount of moderate-intensity PA undertaken per week (hardly active; mostly seated activities; light-intensity PA (2-4 hours per week); moderate-intensity PA (1-2 hours per week) or light-intensity PA (>4 hours per week); moderate-intensity >3 hours per week; high-intensity PA several times per week) | ✓  |    |    |    | ✓  | ✓  | <b>S</b> |
| Late-Life Function and Disability Instrument, LLFDI, to assess meaningful change in function (person’s ability to do discrete actions/activities) and disability (person’s performance of                                                                                                                    |    |    |    | ✓  | ✓  | ✓  | <b>P</b> |

|                                                                                                                                                       |   |     |  |       |          |
|-------------------------------------------------------------------------------------------------------------------------------------------------------|---|-----|--|-------|----------|
| socially defined tasks) <b>(30, 31)</b>                                                                                                               |   |     |  |       |          |
| <b>Medical history and medication use</b>                                                                                                             |   |     |  |       |          |
| 'Have you seen a doctor for being diagnosed for having problems with your joints' <sup>a</sup>                                                        | ✓ |     |  | ✓ ✓   | —        |
| 'Have you seen a doctor for being diagnosed for having problems with your heart' <sup>b</sup>                                                         | ✓ |     |  | ✓ ✓   | —        |
| Medications used (total number, type, frequency, dosage)                                                                                              |   | ✓ ✓ |  | ✓ ✓   | <b>S</b> |
| Fall history (count over last 12 months)                                                                                                              |   |     |  | ✓ ✓ ✓ | <b>S</b> |
| Pain during rest and walking (numeric scale, score 0-10) <b>(36)</b>                                                                                  |   |     |  | ✓ ✓ ✓ | <b>S</b> |
| Blood pressure (mmHg) in lying and standing (after 1 and 3 minutes); pulse, vision, hearing                                                           |   | ✓   |  |       | —        |
| Comorbidities (number, type, date of diagnosis and treatment)                                                                                         |   | ✓   |  |       | —        |
| Height (cm), weight (kg)                                                                                                                              |   | ✓   |  |       | —        |
| Regular alcohol consumption per week (units)                                                                                                          | ✓ |     |  |       | —        |
| <b>Neuropsychological</b>                                                                                                                             |   |     |  |       |          |
| Center for Epidemiologic Studies Depression Scale (CES-D score) to assess symptoms of depression and mood (score range 0-60) * <b>(37)</b>            | ✓ |     |  | ✓ ✓   | <b>S</b> |
| 7- Item Short Version Falls Efficacy Scale-International (FES-I) (score) <b>(38)</b> plus 3 additional FES-I items to assess "fear of falling" * (39) | ✓ |     |  | ✓ ✓   | <b>S</b> |
| Montreal Cognitive Assessment tool, MoCA (converted MoCA score) to assess cognitive function (score $\leq$ /30) * <b>(29)</b>                         | ✓ |     |  | ✓ ✓   | <b>S</b> |

1  
2  
3  
4  
5  
6  
7  
8  
9  
10  
11  
12  
13  
14  
15  
16  
17  
18  
19  
20  
21  
22  
23  
24  
25  
26  
27  
28  
29  
30  
31  
32  
33  
34  
35  
36  
37  
38  
39  
40  
41  
42  
43  
44  
45  
46  
47

| <b>Physical</b>                                                                                                                                                                                                 |                 |   |   |   |          |
|-----------------------------------------------------------------------------------------------------------------------------------------------------------------------------------------------------------------|-----------------|---|---|---|----------|
| Gait speed over 4m (usual pace) <b>(40)</b> and 7m (usual pace <u>and</u> as fast as possible) <b>(41)</b> (best of two trials per measure, m/sec)                                                              | ✓ <sup>\$</sup> | ✓ | ✓ | ✓ | <b>S</b> |
| Hand grip strength using a dynamometer (kg, max score of 3 reps per hand, using the protocol of the inChianti study)                                                                                            | ✓               |   | ✓ | ✓ | —        |
| Five times-sit-to-stand to assess functional strength <b>(40)</b>                                                                                                                                               |                 | ✓ | ✓ |   | <b>S</b> |
| <b>Physical – balance</b>                                                                                                                                                                                       |                 |   |   |   |          |
| Able to perform ‘Tandem stance’ for 10 sec with eyes open (yes/no)                                                                                                                                              | ✓               |   |   |   | <b>S</b> |
| Community Balance and Mobility Scale (CB&MS) used to measure higher level balance and mobility <b>(42)</b>                                                                                                      |                 |   | ✓ | ✓ | <b>S</b> |
| Static balance measured using the 8-Level Balance scale <b>(18)</b>                                                                                                                                             |                 |   | ✓ | ✓ | <b>S</b> |
| <i>Physical – instrumented (participants have a smartphone attached to their lower back, instructions are provided by the assessor. Activity is recorded for the duration of the assessment)</i>                |                 |   |   |   |          |
| 30-second chair stand is completed to quantify strength <b>(35)</b>                                                                                                                                             |                 |   | ✓ | ✓ | <b>S</b> |
| Timed Up and Go <b>(33)</b> to measure sit-to-stand duration and movement jerk, mean step time, variability of step time, interstride trunk sway in anterior-posterior and medio-lateral directions <b>(34)</b> |                 |   | ✓ | ✓ | <b>S</b> |
| Tandem stance, 30 seconds, eyes closed, to assess sway in anterior-posterior and medio-lateral directions                                                                                                       |                 |   | ✓ | ✓ | <b>S</b> |

|                                                                                                                                                                                                                                                                 |   |   |   |          |
|-----------------------------------------------------------------------------------------------------------------------------------------------------------------------------------------------------------------------------------------------------------------|---|---|---|----------|
| Five times sit-to-stand to quantify strength and measure sit-to-stand duration                                                                                                                                                                                  | ✓ |   |   | <b>S</b> |
| Tandem stance, 30 seconds, eyes open, to assess sway in anterior-posterior and medio-lateral directions                                                                                                                                                         | ✓ |   |   | <b>S</b> |
| <i>Physical – self administered (Instructions are provided in written form (paper and smartphone) and acoustic cues are provided through the smartphone)</i>                                                                                                    |   |   |   |          |
| Timed Up and Go <b>(33)</b> is completed to measure sit-to-stand duration and movement jerk, mean step time, variability of step time, interstride trunk sway in anterior-posterior and medio-lateral directions <b>(34)</b>                                    | ✓ | ✓ |   | <b>S</b> |
| Tandem stance, 15 seconds, eyes closed, to assess sway in anterior-posterior and medio-lateral directions                                                                                                                                                       | ✓ |   |   | <b>S</b> |
| Tandem stance, 15 seconds, eyes open, to assess sway in anterior-posterior and medio-lateral directions                                                                                                                                                         |   | ✓ |   | <b>S</b> |
| Five times sit-to-stand to quantify strength and measure sit-to-stand duration                                                                                                                                                                                  | ✓ | ✓ |   | <b>S</b> |
| <b>Physical – Sensor-derived data</b>                                                                                                                                                                                                                           |   |   |   |          |
| Behavioural complexity of PA and sleep measured through activity monitoring (data collection for 7 continuous days) (type, duration, intensity)                                                                                                                 | ✓ | ✓ | ✓ | <b>P</b> |
| Physical activity <b>(43)</b> (a set of sensor-based features extracted from signals, including the percentages of sedentary, active, and walking times, duration and intensity (metabolic equivalent) of the activities, and gait and turning characteristics) | ✓ | ✓ | ✓ | <b>S</b> |
| <b>Health economics / Quality of Life</b>                                                                                                                                                                                                                       |   |   |   |          |



1  
2  
3  
4  
5  
6  
7  
8  
9  
10  
11  
12  
13  
14  
15  
16  
17  
18  
19  
20  
21  
22  
23  
24  
25  
26  
27  
28  
29  
30  
31  
32  
33  
34  
35  
36  
37  
38  
39  
40  
41  
42  
43  
44  
45  
46  
47

|                                                                                                                                                                                                                                                                                                                                                                                                                                                                                                                                                                                                                                                                                                     |   |   |   |          |
|-----------------------------------------------------------------------------------------------------------------------------------------------------------------------------------------------------------------------------------------------------------------------------------------------------------------------------------------------------------------------------------------------------------------------------------------------------------------------------------------------------------------------------------------------------------------------------------------------------------------------------------------------------------------------------------------------------|---|---|---|----------|
| EuroQoL-5D, EQ-5D-5L to measure quality of life and as a utility-based quality of life instrument will be used for estimating QALYs (descriptive profile and a single index value for health-related quality of life) <b>(44)</b>                                                                                                                                                                                                                                                                                                                                                                                                                                                                   | ✓ | ✓ | ✓ | <b>S</b> |
| 12-Item Short Form survey, SF-12, to measure function and well-being / quality of life <b>(45)</b>                                                                                                                                                                                                                                                                                                                                                                                                                                                                                                                                                                                                  | ✓ | ✓ | ✓ | <b>S</b> |
| A resource-use questionnaire is used to ascertain health resource utilisation (e.g. GP visits, medication use, and health care cost from a societal perspective)                                                                                                                                                                                                                                                                                                                                                                                                                                                                                                                                    | ✓ | ✓ | ✓ | <b>S</b> |
| <b>Adherence (monthly follow-up during active and passive intervention period)</b>                                                                                                                                                                                                                                                                                                                                                                                                                                                                                                                                                                                                                  |   |   |   |          |
| Number of visits/calls successfully completed during the intervention period                                                                                                                                                                                                                                                                                                                                                                                                                                                                                                                                                                                                                        |   |   |   | <b>S</b> |
| Withdrawals from intervention (n)                                                                                                                                                                                                                                                                                                                                                                                                                                                                                                                                                                                                                                                                   |   |   |   | <b>S</b> |
| PreventIT mHealth system use after 6 months (eLiFE only)                                                                                                                                                                                                                                                                                                                                                                                                                                                                                                                                                                                                                                            |   |   |   | <b>S</b> |
| Uptake and adherence to recommendations/LiFE (all 3 intervention arms, monthly question) was assessed via email (by use of a secure web-based form) or post including one reminder. "Over the last seven days, did you perform the recommended level of physical activity?" The response options are as follows: i) yes, I did more than I planned; ii) yes, I did them all; iii) yes, but not as much as I intended; iv) no, I did not feel well; v) no, I forgot; vi) No, I did not have time; vii) No, I don't like these activities. The control group's response is identical to the options from the active arm, except the generic term "physical activity" is used instead of "activities". |   |   |   | <b>S</b> |
| Adherence to the recommendations/LiFE (all 3 intervention arms, at post-test and follow-up) and validation of the monthly adherence questions will be evaluated by use of the Exercise                                                                                                                                                                                                                                                                                                                                                                                                                                                                                                              | ✓ | ✓ |   | <b>S</b> |
| Adherence Ratio Scale (EARS) <b>(46)</b>                                                                                                                                                                                                                                                                                                                                                                                                                                                                                                                                                                                                                                                            | ✓ | ✓ |   | <b>S</b> |

| <b>Experience, motivation and behavioural change</b>                                                                                                     |   |   |          |
|----------------------------------------------------------------------------------------------------------------------------------------------------------|---|---|----------|
| Self-Reported Behavioural Automaticity Index to assess habit formation (score, 7-point Likert scale) <b>(47)</b>                                         | ✓ | ✓ | <b>S</b> |
| Level of ease or difficulty in engaging with the intervention and integrating balance, strength, and PA into everyday life (score, 7-point Likert scale) | ✓ | ✓ |          |
| Motivational aspects of the intervention (score, 7-point Likert scale)                                                                                   | ✓ | ✓ | <b>S</b> |
| <b>Willingness to participate</b>                                                                                                                        |   |   |          |
| Recruitment numbers, dropouts (n), CONSORT (participant numbers through trial progression)                                                               |   |   |          |
| Health Action Process Approach (HAPA) to measure participants' motivation <b>(48)</b>                                                                    | ✓ | ✓ | <b>S</b> |
| <b>Usability of technology (eLiFE only)</b>                                                                                                              |   |   |          |
| The System Usability Scale <b>(49)</b> at post-test and 12 months follow-up                                                                              | ✓ | ✓ | <b>S</b> |
| The Telehealthcare Satisfaction Questionnaire – Wearable Technology (TSQ-WT) <b>(50)</b> at post-test and 12 months follow-up                            | ✓ | ✓ | <b>S</b> |
| Issues logs from eLiFE participants will be summarized and described                                                                                     |   |   |          |
| PreventIT mHealth system feasibility, adherence and progression                                                                                          | ✓ | ✓ | <b>S</b> |
| Usability technology (questionnaire)                                                                                                                     | ✓ | ✓ | <b>S</b> |
| Data from PreventIT mHealth system                                                                                                                       | ✓ | ✓ | <b>S</b> |
| - PA sensors (daily distribution of walking, sedentary time and active intervals)                                                                        |   |   |          |

- Daily reporting of activities (strength and balance goals achieved?)

- Use of smartphone (number of phone calls, SMS, number of contacts, GPS location (STU and TRD only))

- Use of application (usage, changes in activity selection)

- Difficulties with technology (via an Issue Log)

Acceptability of the intervention

✓

S

Focus groups (10 participants per intervention arm, at each site): qualitative analysis of narratives of experience of recruitment process, randomisation process, screening and assessments, home visits, instructors, tools used (paper-based or technology), support in intervention period, activities undertaken, ideas for improvement. Qualitative data will also be used to evaluate usability of technology.

✓

S

Focus groups (with all assessors and instructors): qualitative analysis of narratives of recruitment process, training, successes and challenges in delivering intervention, ideas for improvement.

✓

S

Issues logs from the instructors will be evaluated related to acceptability from the instructors' perspectives

S

Acceptability questionnaire (**51**) with rating of helpfulness of a/eLiFE activities for improving balance, strength, PA; perceived safety during a/eLiFE practice; perceived level of difficulty, activity preference, adaptability of activities to fit individual lifestyles and daily activities

✓

✓

S

Adverse events – intervention related and unrelated

S

\* assessment is part of the risk screening and eligibility criteria, as well as being an outcome measure. \$ only 7 meter walk at fast pace was assessed during the RS. TS = Telephone screening, RS= Risk screening, MS = Medical Screening, BA=Baseline Assessment, 6mth = Assessment 6mths post randomisation,

1  
2  
3  
4  
5 *12mth= Assessment 12mth post randomisation, O=Outcome measure, S=secondary, P=Primary, -=not an outcome measure, TRD= clinical site Trondheim,*  
6 *Norway, STU= clinical site Stuttgart, Germany, PA= Physical activity.* <sup>a</sup>question is answered yes/no, and if “yes”, if any arthrosis, rheumatologic diseases, or  
7 other arthropathies or joint disorders are registered. <sup>b</sup>question is answered yes/no, and if “yes”, if any heart failure, myocardial infarction, cardiac  
8 dysrhythmias or arrest, valvular disease, or other ischemic heart disease are registered, and if “no”, if any cerebrovascular disease or stroke,  
9 hypertension/high blood pressure, or peripheral artery disease are registered.  
10  
11  
12  
13  
14  
15  
16  
17  
18  
19  
20  
21  
22  
23  
24  
25  
26  
27  
28  
29  
30  
31  
32  
33  
34  
35  
36  
37  
38  
39  
40  
41  
42  
43  
44  
45  
46  
47

For peer review only

Table 4. Schedule of enrolment, interventions, and assessments

|                                     | Study period    |                 |                |            |                 |                  |     |                 |    |                 |
|-------------------------------------|-----------------|-----------------|----------------|------------|-----------------|------------------|-----|-----------------|----|-----------------|
|                                     | Enrolment       |                 | Pre-allocation | Allocation | Post-allocation |                  |     |                 |    |                 |
| Time point                          | -t <sub>2</sub> | -t <sub>1</sub> | T1             | 0          | PA <sub>1</sub> | HV1 <sup>§</sup> | T2  | PA <sub>2</sub> | T3 | PA <sub>3</sub> |
| ENROLMENT                           |                 |                 |                |            |                 |                  |     |                 |    |                 |
| Telephone screening                 | x               |                 |                |            |                 |                  |     |                 |    |                 |
| Risk screening                      |                 | x               |                |            |                 |                  |     |                 |    |                 |
| Medical Screening                   |                 | x               |                |            |                 |                  |     |                 |    |                 |
| Randomisation                       |                 |                 |                | x          |                 |                  |     |                 |    |                 |
| ASSESSMENT *                        |                 |                 |                |            |                 |                  |     |                 |    |                 |
| Baseline                            |                 |                 | x              |            |                 |                  |     |                 |    |                 |
| PA monitoring                       |                 |                 |                |            | x               |                  |     | x               |    | x               |
| Reassessment                        |                 |                 |                |            |                 |                  | x   |                 |    |                 |
| Follow-up                           |                 |                 |                |            |                 |                  |     |                 | x  |                 |
| INTERVENTION (active intervention)  |                 |                 |                |            |                 |                  |     |                 |    |                 |
| eLiFE                               |                 |                 |                |            |                 | x — x            |     |                 |    |                 |
| aLiFE                               |                 |                 |                |            |                 | x — x            |     |                 |    |                 |
| Control Group                       |                 |                 |                |            |                 | x                |     |                 |    |                 |
| INTERVENTION (passive intervention) |                 |                 |                |            |                 |                  |     |                 |    |                 |
| eLiFE                               |                 |                 |                |            |                 |                  | x — |                 | x  |                 |
| aLiFE                               |                 |                 |                |            |                 |                  | x — |                 | x  |                 |
| Control Group                       |                 |                 |                |            |                 | x —              |     |                 | x  |                 |

\* Outcome measures collected during the assessments are listed in Table 3.

1  
2  
3  
4 \$ Home visit (HV) 1 was completed 8-15 days after the baseline assessment.

5  
6 PA monitoring / PA<sub>1</sub>, PA<sub>2</sub>, PA<sub>3</sub> participants physical activity was monitored for 7 consecutive days. No  
7 contact to the research team was permitted during this time.  
8  
9

10  
11 Table 5. Overview of intervention timeframe  
12

| Time point     | eLiFE                                              | aLiFE               |
|----------------|----------------------------------------------------|---------------------|
| <b>Week 0</b>  | Extra home visit if no prior smartphone experience |                     |
| <b>Week 1</b>  | Home visit 1                                       | Home visit 1        |
| <b>Week 2</b>  | Home visit 2                                       | Home visit 2        |
| <b>Week 4</b>  | <i>Phone call 1</i>                                | Home visit 3        |
| <b>Week 5</b>  | Home visit 3                                       | <i>Phone call 1</i> |
| <b>Week 6</b>  |                                                    | Home visit 4        |
| <b>Week 9</b>  | Home visit 4                                       | Home visit 5        |
| <b>Week 11</b> |                                                    | <i>Phone call 2</i> |
| <b>Week 13</b> | <i>Phone call 2</i>                                | Home visit 6        |
| <b>Week 17</b> | <i>Phone call 3</i>                                | <i>Phone call 3</i> |

### 39 40 Randomisation

41  
42 Randomisation is undertaken following one week of activity monitoring at baseline, using a web-  
43 based randomisation procedure developed, used and run by the Unit for Applied Clinical  
44 Research at the Faculty of Medicine and Health Sciences at NTNU. Randomisation is stratified  
45 to centre and performed by block randomisation, where block sizes can vary. One person at each  
46 site, unblinded to group allocation, has access to the web-based randomisation platform and  
47 forwards the result to the instructors who provide the intervention. Recruitment continues until  
48 60 participants have completed their first home visit per study site.  
49  
50

### 51 52 Interventions

1  
2  
3  
4 Following the feedback from participants in a pilot study, the aLiFE activity framework is  
5 applied in both intervention arms. Details of the intervention components are shown in Table 6  
6 (TiDieR Guidelines). In short, the programme consists of strategies a) to **improve balance** by  
7 use of four principles (“decreasing base of support”, “shifting your weight to the limits of  
8 stability”, “stepping over objects”, and “stepping, hopping and jumping in different ways”); b) to  
9 **increase muscle strength** by use of seven principles (“bend your knees”, “sit to stand”, “on your  
10 toes”, “on your heels, “up the stairs”, “move sideways” and “tighten muscles”); and c) to **reduce**  
11 **sedentariness and increase physical activity** by teaching the participants two principles (“sit  
12 less” and “walk more”). In addition, the programme comprises a behavioural change model for  
13 developing intentions to become more physically active and turning these intentions into actions  
14 by embedding activities into daily life to make them habitual. As the participants learn the  
15 programme, they can find opportunities, choose other activities, and upgrade their existing  
16 activities (Table 6).  
17  
18  
19  
20  
21  
22  
23  
24  
25

26 The activities are individually tailored to each participant’s functional status at the first home  
27 visit by use of an initial balance and strength assessment (the **LiFE assessment tool, LAT**),(17)  
28 defining the starting level for the balance and strength activities.  
29  
30  
31

32 Both eLiFE and aLiFE participants receive home visits during which instructors teach and  
33 deliver the life-style integrated exercise programme. Three follow-up / booster phone calls are  
34 also provided during the 6 month active intervention period (Table 6). eLiFE participants receive  
35 instructions by use of video clips, pictures and text/verbal instructions in the PreventIT  
36 application on a smartphone for each activity and aLiFE participants use a paper-based manual  
37 with descriptions and instructions for the same activities. eLiFE participants receive android  
38 phones that they use during the intervention and follow-up period. Participants without any  
39 smartphone experience receive one extra home visit with information on how to use a  
40 smartphone prior to starting the home visits in week 1. eLiFE participants also receive  
41 technological support to navigate through the application. The architecture of the eLiFE  
42 application system is shown in Figure 1. The active intervention is scheduled for 6 months in  
43 order to be able to change behaviour.(52, 53) Participants are encouraged to continue  
44 independently to use smartphones and smartwatches (eLiFE) or their paper materials (aLiFE)  
45 during the passive follow-up period (between months 7 and 12).  
46  
47  
48  
49  
50  
51  
52  
53  
54  
55  
56  
57  
58  
59  
60

Table 6. Intervention description using the Template for Intervention Description and Replication (TIDieR) checklist.

|                   |                     |                                                                                                                                                                                                                                                                                                                                                                                                                                                                                                                                                                                                                                                                                                                                                                                                 |                                                                                                                                                                                                                                                                                                                                                                                                                                                                                                                                                    |                                                                                                             |
|-------------------|---------------------|-------------------------------------------------------------------------------------------------------------------------------------------------------------------------------------------------------------------------------------------------------------------------------------------------------------------------------------------------------------------------------------------------------------------------------------------------------------------------------------------------------------------------------------------------------------------------------------------------------------------------------------------------------------------------------------------------------------------------------------------------------------------------------------------------|----------------------------------------------------------------------------------------------------------------------------------------------------------------------------------------------------------------------------------------------------------------------------------------------------------------------------------------------------------------------------------------------------------------------------------------------------------------------------------------------------------------------------------------------------|-------------------------------------------------------------------------------------------------------------|
| 1. Brief name     | Study name          | <p style="text-align: center;">PreventIT</p> <p style="text-align: center;">(Early risk detection and prevention in ageing people by self-administered ICT-supported assessment and a behavioural change intervention, delivered by use of smartphones and smartwatches)</p>                                                                                                                                                                                                                                                                                                                                                                                                                                                                                                                    |                                                                                                                                                                                                                                                                                                                                                                                                                                                                                                                                                    |                                                                                                             |
|                   | Intervention groups | <p style="text-align: center;">The <b>aLiFE</b> programme</p> <p style="text-align: center;"><b>(experimental group 1)</b></p>                                                                                                                                                                                                                                                                                                                                                                                                                                                                                                                                                                                                                                                                  | <p style="text-align: center;">The <b>eLiFE</b> programme</p> <p style="text-align: center;"><b>(experimental group 2)</b></p>                                                                                                                                                                                                                                                                                                                                                                                                                     | <p style="text-align: center;">WHO guidelines</p> <p style="text-align: center;"><b>(control group)</b></p> |
| 2. Why            |                     | <p>A rapidly aging population will place increasing stress on our health care systems. The focus needs to shift from treatment towards health promotion for active and healthy ageing and prevention of age-related diseases. The PreventIT project has adapted a lifestyle-integrated exercise programme (LiFE) to suit healthy young older adults at risk for future accelerated functional decline into two interventions: One delivered by instructors and use of paper manuals (aLiFE), and one delivered via mobile phone (smartphone) with a virtual instructor (eLiFE). The aim is to develop and test a personalised behaviour change intervention on physical activity aimed at young older adults that has the potential to prevent accelerated functional decline at older age.</p> |                                                                                                                                                                                                                                                                                                                                                                                                                                                                                                                                                    |                                                                                                             |
| 3. What materials |                     | <p><b>Paper manual -</b></p> <p>The aLiFE manual included descriptions and instructions of the activities selectable within the programme (strength and balance exercises), an activity planner (weekly use) and activity counter (daily use), safety instructions and further information about increasing physical activity and reducing sedentariness.</p>                                                                                                                                                                                                                                                                                                                                                                                                                                   | <p><b>PreventIT mHealth system on smartphone and smartwatch -</b></p> <p>eLiFE was delivered via the PreventIT mHealth system. Participants received instructions by use of video clips, pictures and text/verbal instructions on the PreventIT smartphone for the activities. The architecture of the eLiFE application system is shown in Figure 1. Activity planning, reporting and feedback is provided entirely through the smartphone application. Participants receive one trouble-shooting document to aid with technological problems</p> | <p>One page WHO guidelines regarding recommended PA levels per week for the target group.</p>               |



|                   |                            |                                                                                                                                                                                                                                                                                                                                                                                                                                                                 |                                                                                                                                                                                                                                                                  |  |
|-------------------|----------------------------|-----------------------------------------------------------------------------------------------------------------------------------------------------------------------------------------------------------------------------------------------------------------------------------------------------------------------------------------------------------------------------------------------------------------------------------------------------------------|------------------------------------------------------------------------------------------------------------------------------------------------------------------------------------------------------------------------------------------------------------------|--|
|                   |                            |                                                                                                                                                                                                                                                                                                                                                                                                                                                                 | they may encounter. Instructors are available to help participants use the smartphone during home visits.                                                                                                                                                        |  |
| 4. What procedure |                            | All participants receive a risk screening and medical assessment, to ensure study eligibility and rule out contra-indications to an exercise intervention. A detailed baseline assessment at a clinical site and a 7-day PA monitoring is completed. Participants are informed of their group allocation after their 7-days of PA monitoring is completed.                                                                                                      |                                                                                                                                                                                                                                                                  |  |
|                   |                            | Intervention groups<br>Receive direct support through a trained staff member to implement the a/eLiFE programme into their daily life and understand the concept of the programme. Assistance is provided on how to select, upgrade and identify additional daily situations to integrate activities. Participants receive home visits as well as support phone calls during the 6-month active intervention period as part of the ongoing active intervention. | Control group<br>During a single home visit the written WHO guidelines are provided to participants with guidance on the dose-response relationship between the frequency, duration, intensity, type and total amount of physical activity recommended per week. |  |
| 5. Who provided   | Assessment                 | All assessments completed at the clinical sites are completed by blinded research staff with tertiary qualification as physiotherapists or exercise scientists. Assessments are completed at baseline (T1), 6 months post-randomisation (T2) and 12 months post-randomisation (T3).                                                                                                                                                                             |                                                                                                                                                                                                                                                                  |  |
|                   | Intervention               | Following randomisation, participants receive the relevant intervention delivered in their home, provided by physiotherapists or exercise scientists. All staff had undergone a 3-day workshop to ensure standardised intervention delivery across all three clinical sites.                                                                                                                                                                                    |                                                                                                                                                                                                                                                                  |  |
| 6. How            | Invitation to participate  | Persons born between 1947 and 1956 (61-70 years of age at the time of inclusion) were invited via mail-out to participate. Three respective local registries randomly selected persons within the target group. Participants were required to contact their respective site actively if they were interested.                                                                                                                                                   |                                                                                                                                                                                                                                                                  |  |
|                   | Telephone screening        | A telephone screening determined eligibility to attend the risk screening of potential participants.                                                                                                                                                                                                                                                                                                                                                            |                                                                                                                                                                                                                                                                  |  |
|                   | Risk screening and medical | The risk screening is completed by trained researchers and a medical screening is completed by medical doctors at each site. The multistep process ensures participants                                                                                                                                                                                                                                                                                         |                                                                                                                                                                                                                                                                  |  |

|                      |                            |                                                                                                                                                                                                                                                                                                                                                                                                                                                                                                                                                                                             |                                                                                                                                                                                                                                                                                                                                                                                                                                                     |                                       |
|----------------------|----------------------------|---------------------------------------------------------------------------------------------------------------------------------------------------------------------------------------------------------------------------------------------------------------------------------------------------------------------------------------------------------------------------------------------------------------------------------------------------------------------------------------------------------------------------------------------------------------------------------------------|-----------------------------------------------------------------------------------------------------------------------------------------------------------------------------------------------------------------------------------------------------------------------------------------------------------------------------------------------------------------------------------------------------------------------------------------------------|---------------------------------------|
|                      | screening                  | meet in/exclusion criteria, and that an exercise programme is deemed safe from a medical perspective.                                                                                                                                                                                                                                                                                                                                                                                                                                                                                       |                                                                                                                                                                                                                                                                                                                                                                                                                                                     |                                       |
|                      | T1, T2, T3 assessment      | The assessments are completed by blinded research staff at the three clinical sites.                                                                                                                                                                                                                                                                                                                                                                                                                                                                                                        |                                                                                                                                                                                                                                                                                                                                                                                                                                                     |                                       |
|                      |                            | The interventions (aLiFE and eLiFE) are delivered in the participants' home, the types of activities and difficulty levels are dependent on the individual's ability and preference. Home visits and follow-up phone calls are completed according to a predefined schedule. Participants are permitted to attend further exercises groups, undertake other activities or seek further health care during the duration of the trial which are beyond the scope of the RCT. Details are recorded during assessments (T2, T3) but no additional assistance is provided by the research staff. | The control group receives a single home visit and is provided with written information about PA recommendations only.<br><br>Participants are permitted to attend exercises groups, undertake other activities or seek health care during the duration of the trial which are beyond the scope of the control group intervention. Details are recorded during assessments (T2, T3) but no additional assistance is provided by the research staff. |                                       |
| 7. Where             |                            | The RCT is conducted as part of the PreventIT project (Early risk detection and prevention in ageing people by self-administered ICT-supported assessment and a behavioural change intervention, delivered by use of smartphones and smartwatches), a European Horizon2020 ICT and personal health project (project number 689238).The three participating clinical centres are Trondheim, Norway, Amsterdam, The Netherlands and Stuttgart, Germany.                                                                                                                                       |                                                                                                                                                                                                                                                                                                                                                                                                                                                     |                                       |
| 8. When and how much |                            | <b>The aLiFE programme (experimental group 1)</b>                                                                                                                                                                                                                                                                                                                                                                                                                                                                                                                                           | <b>The eLiFE programme (experimental group 2)</b>                                                                                                                                                                                                                                                                                                                                                                                                   | <b>WHO guidelines (control group)</b> |
|                      | Home visits, Phone calls   | 6 home visits<br>3 phone calls                                                                                                                                                                                                                                                                                                                                                                                                                                                                                                                                                              | 4 home visits<br>3 phone calls                                                                                                                                                                                                                                                                                                                                                                                                                      | 1 home visit                          |
|                      | Active Intervention period | 6 months                                                                                                                                                                                                                                                                                                                                                                                                                                                                                                                                                                                    | 6 months                                                                                                                                                                                                                                                                                                                                                                                                                                            | n/a                                   |
|                      | Passive follow-up period   | 6 months                                                                                                                                                                                                                                                                                                                                                                                                                                                                                                                                                                                    | 6 months                                                                                                                                                                                                                                                                                                                                                                                                                                            | 12 months                             |
|                      | Instructor main role       | Teach the programme                                                                                                                                                                                                                                                                                                                                                                                                                                                                                                                                                                         | Teach how to use the PreventIT mHealth system                                                                                                                                                                                                                                                                                                                                                                                                       | n/a                                   |

|              |                             |                                                                                                                                                                                                                                     |                                                                                                                                                                                                                                                               |     |
|--------------|-----------------------------|-------------------------------------------------------------------------------------------------------------------------------------------------------------------------------------------------------------------------------------|---------------------------------------------------------------------------------------------------------------------------------------------------------------------------------------------------------------------------------------------------------------|-----|
|              | Activities                  | Participants choose activities from the strength, balance and/or PA domain to integrate into their daily activities. The number of activities is individual and an activity planner and counter is used for documentation purposes. | The PreventIT mHealth system suggests a list of activities to participants ranked according to the expected level of benefit. Participants select their preferred activities from this list. The number of activities chosen is determined by the individual. | n/a |
|              | Training goals              | Decided by the participants with help of a pre-specified list of possible goals                                                                                                                                                     | Participants select goals from a pre-specified list within the application                                                                                                                                                                                    | n/a |
|              | Phenotyping tool            | Not used in aLiFE                                                                                                                                                                                                                   | Results from assessments (T1) are included in the PreventIT mHealth system for each participant individually prior to the first home visit to decide what to prioritise among the activities (balance, strength, or physical activity).                       | n/a |
|              | Motivation                  | Provided by the instructor based individual progress (e.g. reviewing the activity planner during home visits)                                                                                                                       | Personalized motivational messages are displayed on the phone based on chosen activities and the reported adherence                                                                                                                                           | n/a |
|              | Social interaction /Chat    | n/a                                                                                                                                                                                                                                 | Participants can use the platform "Slack" for group chat to communicate anonymously with other eLiFE participants at their clinical site.                                                                                                                     | n/a |
| 9. Tailoring | aLiFE assessment tool (LAT) | The LAT is performed at the first home visit so the instructor can set the initial difficulty level on the balance and strength activities                                                                                          | The LAT is performed at the first home visit, instructors manually add the results to the PreventIT mHealth system, and the system sets the initial difficulty level on the balance and strength activities                                                   | n/a |
|              | Progression                 | The instructor teaches the participants when to upgrade the number of activities and situations during the                                                                                                                          | Participants can independently progress their activities based on the rule that the user has performed the activity each day                                                                                                                                  |     |

|                  |            |                                                                                                                                                                                                                                                                                                                                                                                                                                                                                                                                                                                                                                                                                                                                                                                                                                                                                                                                                                                                                                              |                                                                                                                                                                                                                                                                                                                                                                    |     |
|------------------|------------|----------------------------------------------------------------------------------------------------------------------------------------------------------------------------------------------------------------------------------------------------------------------------------------------------------------------------------------------------------------------------------------------------------------------------------------------------------------------------------------------------------------------------------------------------------------------------------------------------------------------------------------------------------------------------------------------------------------------------------------------------------------------------------------------------------------------------------------------------------------------------------------------------------------------------------------------------------------------------------------------------------------------------------------------|--------------------------------------------------------------------------------------------------------------------------------------------------------------------------------------------------------------------------------------------------------------------------------------------------------------------------------------------------------------------|-----|
|                  |            | subsequent home visits                                                                                                                                                                                                                                                                                                                                                                                                                                                                                                                                                                                                                                                                                                                                                                                                                                                                                                                                                                                                                       | for the last 7 days for at least 50% of the goal on average and at least 50% of the goal on each of the last three days.<br><br>The progression is not compulsory when a higher level becomes accessible.                                                                                                                                                          |     |
|                  | Feedback   | Feedback is provided by the instructor based on individual progress (reviewing the activity planner and counter) during home visits                                                                                                                                                                                                                                                                                                                                                                                                                                                                                                                                                                                                                                                                                                                                                                                                                                                                                                          | Participants receive feedback on their PreventIT mHealth system:<br><br>1. based on physical behaviour monitored by the smartphone and the smartwatch (time of PA and amount of sedentariness).<br><br>2. depending on the amount (type and dose) of strength and balance activities completed (in app adherence reporting) in relation to the intended type/dose. | n/a |
| 10. Modification | Super-user | Participants are recommended to select activities that are challenging and relevant to the individual as identified using the LAT. As some participants reached Level 4 (highest level) on certain activities (mainly strength exercises), further 'upgrades' to the activities were offered. This 'super user' concept aims to further increase the task challenge (beyond Level 4) in order to ensure a training intensity which induces motor adaptations and clinically relevant improvements in functional performances. It includes elements of peak strain, slow motion (extended muscle loading), increased number of repetitions, differential training (learning through change/differences in movement variables e.g. joint angle/position), combining strength and balance activities, decreasing base of support, and more complex sensorimotor tasks.<br><br>Participants are able to access the 'super-user' function for a specific activity after having performed the particular activity at 100% for 14 consecutive days. |                                                                                                                                                                                                                                                                                                                                                                    | n/a |

|                        |                               |                                                                                                                                                                                                                                                                                                                                                                                            |                                                                                                                                                                    |     |
|------------------------|-------------------------------|--------------------------------------------------------------------------------------------------------------------------------------------------------------------------------------------------------------------------------------------------------------------------------------------------------------------------------------------------------------------------------------------|--------------------------------------------------------------------------------------------------------------------------------------------------------------------|-----|
| 11. How well - planned | Participant Daily Adherence   | Daily adherence can be reported using the activity counters, with responses being dichotomous (completed, not completed)                                                                                                                                                                                                                                                                   | Daily adherence is reported on the PreventIT mHealth system that specifically asks about the planned/intended activities as previously defined by the participant. | n/a |
|                        | Participant Monthly adherence | Monthly adherence data is obtained via a web-link or via a postal question. Participants are asked if they completed all their activities/PA as intended in the last 7 days. The responses are: 1) yes, more than intended; 2) yes, as much as intended; 3) yes, but not as much as intended; 4) no, did not feel well; 5) no, forgot; 6) no, no time; 7) no, dislike of planned activity. |                                                                                                                                                                    |     |
|                        | Instructor fidelity           | Training is delivered independently in each of the three clinical sites. All instructors adhere to a single training protocol to ensure standardised delivery of the programme across sites. Training delivery was taught during a 3-day workshop with subsequent exam.                                                                                                                    |                                                                                                                                                                    |     |

n/a=not applicable, this intervention component is not available in this intervention arm/ control group; T1=Baseline assessment; T2=Assessment 6 months post-randomisation  $\pm$  2 weeks; T3=Assessment 12 months post-randomisation  $\pm$  4 weeks.

### eLiFE/aLiFE instructors

The instructors follow an eLiFE and aLiFE instructor manual with topics to teach during each home visit/phone call. To ensure all clinical sites deliver the programme in a standardised manner, instructors attended a three-day workshop covering the **eLiFE and aLiFE concept**. aLiFE components including aims, activity principles, behavioural change concept, instructing and supporting the participants in action planning using the activity planner and activity counter, upgrading activities during subsequent home visits and phone calls, and safety principles were taught. The eLiFE concept included the same content as aLiFE and additionally, knowledge about the PreventIT mHealth system and how to instruct the participants to use the technology was included in the workshop. All instructors were tested and awarded certification prior to the start of the study, to ensure that they had the competences needed to deliver both the eLiFE and the aLiFE interventions.

### Control group

The control group receives one home visit to provide them with a two-page written summary of the WHO recommendations of physical activity.<sup>(54)</sup> These guidelines are relevant to all healthy

1  
2  
3 older adults unless specific medical conditions indicate the contrary, and highlight the benefits of  
4 being physically active as well as stimulate the recommended amount of physical activity to be  
5 undertaken per week.  
6  
7

8  
9 Semi-structured focus group interviews are conducted with a maximum of 10 participants from  
10 each intervention arms and control group at each site, after the post-test (T2) assessment. The  
11 topics to be discussed include: a) the recruitment process; b) the randomisation process; c)  
12 screening and assessments; d) home visits; e) the instructors; f) the tools used (paper-based and  
13 technology enabled); g) support in the intervention period; h) the activities undertaken; i)  
14 experience of the follow-up period; j) ideas for improvement. In addition, the eLiFE participants  
15 are asked to keep an “Issues log” to record issues and difficulties with the technology and on the  
16 trial procedure.  
17  
18  
19  
20  
21  
22

23 At the end of the trial, interviews with the assessors and the instructors will be performed.  
24 Interviews will be performed face-to-face, using a semi-structured interview guide. Topics to be  
25 discussed include: a) the recruitment process; b) the training received; c) successes and  
26 challenges in delivering the intervention; d) ideas for improvement. Focus groups and interviews  
27 are expected to last between 90-120 minutes. All focus groups and interviews are recorded using  
28 a digital voice recorder, transcribed, and translated into English prior to data analysis.  
29  
30  
31  
32  
33

### 34 **Participant retention, adherence and dropout**

35  
36 Participants’ progression through the study phases is documented and presented in a CONSORT  
37 (55) flow diagram. Reasons for dropout from the entire trial, or the intervention programme only,  
38 are recorded. In consenting to the trial, participants are consenting to the trial treatment, follow-  
39 up and data collection. If withdrawal from the randomly allocated treatment occurs, participants  
40 are still followed up if they consent. Participants are allowed to withdraw without giving a  
41 reason at any time and a withdrawal CRF is completed to document the date and reason (if  
42 known) for withdrawal. Data collected up to the time of withdrawal will be included in analyses  
43 unless the patient specifically asks for it to be withdrawn.  
44  
45  
46  
47  
48  
49

50  
51 In all three study arms adherence to the intervention is measured monthly by use of a single  
52 question answerable via email or postcard (see details in Table 6). The intervention arms also  
53 report their exercise adherence on a daily basis through in-app reporting (eLiFE) or paper  
54  
55  
56  
57  
58  
59

1  
2  
3 documentation (aLiFE: activity counter). Adherence measures are part of the study procedure as  
4 well as an outcome measure in this trial.  
5  
6

### 7 **Safety considerations and adverse events**

9  
10 Based on existing literature, the risk of adverse events during the eLiFE and aLiFE training is  
11 estimated to be low.(17, 18) The safety aspect is emphasised in the eLiFE and aLiFE  
12 programmes, including the participants' manuals and smartphone app. Exercise training can have  
13 side effects and thus some adverse reactions such as muscle pain or adverse events like falls due  
14 to being more physically active in everyday life are expected. Several strategies have been  
15 incorporated in this trial to minimise the risk for study participants.  
16  
17

18  
19  
20 The number and description of adverse events that occur during the intervention and follow-up  
21 period that could be attributable to participation in the eLiFE or aLiFE programmes are recorded.  
22 Participants are encouraged to report any adverse events and the medical responsible person at  
23 each site evaluates the need for further medical care. In case of any serious adverse event,  
24 participants are encouraged to seek appropriate medical advice/help. All adverse events are  
25 reported to the PreventIT Independent Data Monitoring Committee (IDMC) and will be reported  
26 in all publications arising from this project.  
27  
28  
29  
30  
31

### 32 **Planned data analyses**

33  
34  
35 A complete data analysis plan was finalised on October 3<sup>rd</sup> 2017 before the T2 assessments (at 6  
36 months) started (accessible via first author).  
37  
38  
39

40 The first analyses will be performed blinded to group allocation. It will be evaluated whether  
41 there is a pattern of missing data, and sensitivity analyses will be performed when missing data,  
42 collected via an assessor or using the smartphone, are judged not missing at random. Data at  
43 baseline will be analysed using descriptive statistics. The primary clinical outcome measures will  
44 evaluate the change in function from baseline (T1) to follow-up (T3), for the eLiFE and the  
45 aLiFE interventions compared to the control group. Linear mixed-models will be used which will  
46 include factors for time point and study allocation, as well as their interaction, as independent  
47 variables. Within-subject baseline risk will be accounted for by including a subject-specific  
48 random intercept. Due to a limited number of centres (three), the centre effect will be treated as  
49 fixed rather than random, and included among the independent variables. Estimates of effect  
50  
51  
52  
53  
54  
55  
56  
57  
58  
59  
60

1  
2  
3 sizes for the differences between eLiFE, aLiFE and control groups, and for changes within the  
4 eLiFE and aLiFE groups, will be provided as mean differences for the outcome variables. In case  
5 of non-normality, other appropriate models will be used. Results will be used to perform  
6 calculations of sample sizes to determine the optimal number of participants to be included when  
7 planning for a future final RCT to detect a real effect as statistically significant.  
8  
9

10  
11  
12 The analysis of change will be based on intention-to-treat, but a per protocol analysis will also be  
13 conducted as a sensitivity analysis as this is likely to provide further insight into the feasibility of  
14 the interventions.  
15  
16

17  
18 In order to determine a potential dose-response association between the adherence and outcome,  
19 the association between the two primary clinical outcomes, measured by LLFDI and activity  
20 monitoring (complexity metric), and the adherence measures collected (single question every  
21 four weeks to all participants in all three groups) will be assessed. Further subgroup analysis  
22 dependent on group allocation or adherence are described in detail in the analysis plan.  
23  
24  
25

26  
27 Multimodal analyses will be performed to calculate behavioural complexity using appropriate  
28 metrics such as Lempel-Ziv complexity (LZC). LZC determines the number of distinct temporal  
29 sequences of *multivariate physical activity states*, as well as the rate of their recurrence, with  
30 larger values indicating higher complexity of the given activity pattern.(20) Data collected from  
31 the seven-day activity monitoring will be processed offline making use of software developed in  
32 the FARSEEING project (<http://farseeingresearch.eu>).(43) A set of sensor-based physical  
33 activity features will be extracted from the signals, including the percentages of sedentary,  
34 active, and walking times, duration and intensity (metabolic equivalent) of the activities, and gait  
35 and turning characteristics. Combinations of these features will be used to define the multivariate  
36 states.(20)  
37  
38  
39  
40  
41  
42  
43

44  
45 A further focus of the analyses will be on the willingness to participate, adherence to the  
46 interventions, and acceptance of the interventions, including the technology used to deliver the  
47 intervention and give feedback and motivation for behavioural change.  
48  
49

50  
51 Another focus will be to analyse the data collected by the technology to establish their reliability,  
52 to analyse participants' perception of which activities they have completed compared to what  
53 sensors have recorded as well as exploring additional metrics.  
54  
55  
56  
57  
58  
59



1  
2  
3  
4 The health economics analysis will focus on the feasibility of collecting data on, and estimate,  
5 health care resource utilisation, costs and quality adjusted life years (QALYs), and model  
6 incremental cost-effectiveness ratios (ICERs) of eLiFE and aLiFE compared with the control  
7 group over a 6- and 12-month period in a standard within-trial evaluation model. EQ-5D-5L  
8 health utility scores will be used to calculate QALYs for economic evaluation. Published  
9 national unit costs will be used to calculate the total costs of resource utilisation.

10  
11  
12  
13  
14 This feasibility RCT is a hypothesis-generating study, where additional explorative analyses not  
15 described in this protocol paper or data analysis plan might be planned and performed.

### 16 17 18 **Data storing and security**

19  
20 Data are collected by the research staff, and from smartphones and smartwatches used by eLiFE  
21 participants. Data are stored in three different locations: in a web-based case report system  
22 (WebCRF), developed by NTNU, in the memories of the individual smartphones, and in an in-  
23 house protected server at NTNU. "Data are synched daily from the smartphones onto the servers.  
24 Moreover Data on the servers are backed up daily as part of the routine scheduled backup of the  
25 NTNU computer center that hosts the PreventIt servers. Participants' ID and identifiable  
26 information are kept locally and securely by recruiters at each site at all times. Data in the  
27 WebCRF and in the NTNU servers are pseudonymised. Only research staff directly involved in  
28 the analysis of the RCT will have access to the final trial dataset, which will only contain non-  
29 identifiable information.  
30  
31  
32  
33  
34  
35  
36  
37

38 The in-house web-server will be in a demilitarised zone (DMZ) and behind a firewall. Both the  
39 WebCRF and the data-servers will be behind a second firewall. Security and other ethical issues  
40 are priority, as sensor systems that monitor and report on health-related behaviours depend on  
41 the processing of personal data. All the data on the server are maintained in encrypted databases.  
42  
43  
44

45 All data on smartphones are kept in encrypted databases. All transmission of data between the  
46 server and the smartphones is encrypted. Each phone/user is provided with an individual user  
47 login.  
48  
49  
50

51 After the conclusion of the feasibility RCT, data will remain stored on the NTNU server in  
52 pseudonymised format using participant IDs. Coupling to personal IDs will be stored securely  
53  
54  
55  
56  
57  
58  
59  
60

1  
2  
3 for five years after the end of the PreventIT project at each of the three sites. After this, data will  
4 be fully anonymised.  
5  
6

### 7 **Dissemination policy**

8  
9 We will seek to publish all results from the feasibility trial in open access, peer-reviewed  
10 international journals, and disseminated at scientific and non-scientific conferences and events.  
11 Main results will also be shared on the project website and spread to various stakeholders.  
12 Authorship eligibility will follow ICMJE (International Committee of Medical Journal Editors)  
13 ([http://www.icmje.org/recommendations/browse/roles-and-responsibilities/defining-the-role-of-](http://www.icmje.org/recommendations/browse/roles-and-responsibilities/defining-the-role-of-authors-and-contributors.html)  
14 [authors-and-contributors.html](http://www.icmje.org/recommendations/browse/roles-and-responsibilities/defining-the-role-of-authors-and-contributors.html)).  
15  
16  
17  
18  
19

### 20 **Participant and public involvement**

21  
22 Prior to commencing this feasibility RCT, pilot studies were conducted for both the eLiFE and  
23 the aLiFE intervention mode. These pilot studies provided information about the practical  
24 execution of collecting the relevant outcome measures, and to improve the interventions  
25 components, with a focus on the feasibility and acceptability of the balance, strength and PA  
26 activities. The eLiFE intervention was further tested for usability and acceptability within the  
27 target group. Focus groups were conducted during the pilot studies, providing insight into  
28 participants' priorities, experience and preferences. There are no participant advisers in the  
29 study, as the aim is to conduct a feasibility RCT and not a final RCT.  
30  
31  
32  
33  
34  
35  
36

37 Following the participants final assessment (T3) all participants will get individual, written  
38 results from their participation providing them with an overview of the study status and their  
39 personal results regarding physical outcome measures and the 7-day consecutive PA monitoring.  
40  
41  
42

### 43 **RESULTS**

44  
45 In total 7500 persons between 61 and 70 years of age were drawn from the local registries in  
46 Norway, Germany, and the Netherlands. 2000 letters in Trondheim, 1500 letters in Stuttgart, and  
47 4000 letters in Amsterdam were sent. Following the three step screening process, 180  
48 participants were successfully enrolled into the study, accepted randomisation and completed  
49 their first home visit. The flow of participants from recruitment until randomisation is shown in  
50 Figure 2.  
51  
52  
53  
54  
55  
56  
57  
58  
59  
60

## DISCUSSION

The current study is designed to evaluate the feasibility of conducting a randomised controlled trial of a life-style integrated intervention delivered in two modes, aLiFE (an instructor-delivered, paper-based intervention) and eLiFE (a newly developed intervention using a mobile health application system) compared to simply being given guidelines on physical activity requirements. Both interventions entail embedding activities into daily life, strengthened by a behavioural change model aimed at making the activities habitual. This study further develops and adapts the LiFE programme to suit a younger population of seniors, at retirement age (61-70 years). Particularly at time of retirement, LiFE-based interventions may be beneficial to young older adults by specifically completing lower extremity muscle strengthening and balance activities as well as increasing physical activity to avoid later age-related functional decline. In comparison to traditional exercise programmes, such as group training and gym workouts where one needs to set aside dedicated time to follow the programme, LiFE-based programmes embed small bouts of activities into the individual's routines that are already part of their daily life. This individual tailoring of exercises, and embedding them into daily routines, seems to be a promising approach to keep young older adults active.(56)

Capitalising on the benefits of technological advances and embedding the concept into a mobile health application system, aLiFE was transferred to an ICT-platform to create eLiFE using smartphones and smartwatches, commonly available technology already in use in this target population. There is a rapid development in mobile health application technology, with numerous health applications currently available. Application systems may motivate persons to be more physically active, provide opportunities to personalise interventions, provide feedback to the person using the technology, and help people keep track of their physical activities. Despite this potential, there is at present a lack of systems developed based on existing knowledge from research on exercise programmes and behavioural change, and tailored for use in young older (61-70 years) adults. The current trial will provide data on feasibility and usability of both the mobile health application in eLiFE and the instructor-delivered aLiFE. The aim is that the interventions can empower this population to maintain or increase their activity levels, so that they can stay active and healthy longer at advancing age. The study will provide more

1  
2  
3 knowledge about how to integrate demanding activities into daily life and how to deliver an  
4 intervention to young older adults in order to increase their daily physical activity.  
5  
6

7 Finally, it is challenging to recruit a target population of young older adults without current signs  
8 of functional decline. Understanding how to recruit this specific population will aid in providing  
9 recommendations for a future RCT.  
10  
11

## 12 **Conclusions**

13  
14  
15 It is expected that both eLiFE and aLiFE have the potential to provide effective means to  
16 increase physical activity and complexity, improve functional capacity and change behaviour in  
17 young older adults. By using technology in eLiFE, it is expected that the behavioural change  
18 aspects of the aLiFE intervention are strengthened. It is also expected that an intervention that  
19 embeds more activity into daily life has the potential to empower young older adults to stay  
20 active at older age and therefore has the potential to reduce the risk of future functional decline.  
21  
22  
23  
24  
25

## 26 **Ethics and dissemination**

27  
28 The study and methods were evaluated and approved by the ethical committees in Norway (REK  
29 midt, 2016/1891), Stuttgart (registration number 770/2016BO1), and Amsterdam (METc VUmc  
30 registration number 2016.539 (NL59977.029.16)). The study has approvals to send invitation  
31 letters based on data from local/national registries.  
32  
33  
34  
35

## 36 **Trial status**

37  
38 The trial commenced recruitment in March 2017. In August 2017, 180 participants were  
39 included in the trial.  
40  
41  
42  
43  
44  
45  
46  
47  
48  
49  
50  
51  
52  
53  
54  
55  
56  
57  
58  
59  
60

## Acknowledgements

We thank the ongoing support of participants, research staff, coordinators, data managers and other site staff who have been responsible for setting up the trial, recruiting participants, and collecting data.

**Declaration of interests:** There are no competing interests.

**Funding statement:** The feasibility RCT is part of the EU funded project “PreventIT” (2016-2018, grant number 689238) responding to the Horizon 2020, Personalised Health and Care call PHC-21: Advancing active and healthy aging with ICT: Early risk detection and intervention. The PreventIT project focuses on a new behaviour change activity approach for young older adults (61-70 years of age) with an overall aim to shift focus from treatment of conditions and diseases to early prevention and to empower people to take care of their own health.

The EU was not actively responsible or involved in the study design, collection, management, analysis or interpretation of data. The writing of reports and the decision to submit for publication is not authorised by the EU.

**Data sharing statement:** The PreventIT consortium intends to make data available for data sharing after the data collection has been completed and the primary papers are published.

**Authors’ contributions:** All authors made substantial contribution to the concept and design of the study. KT drafted the manuscript, with input from BV and JLH. EB, DPF, CT, and HHH provided input on behavioural change. SM, AZ, KA, and API provided technical input on the eLiFE description. FY and BG provided input on health economics. CB, MS, and LC provided input on the background information about the project. ABM, JVA, NJ, and MP provided input on the medical assessment and screening of participants. SB, RB, BV, JLH, and LC commented

1  
2  
3 on the entire manuscript. KT, ASM, BV, and JLH critically revised the manuscript with input  
4 from all co-authors. All authors approved the final version of the document.  
5  
6  
7  
8  
9  
10  
11  
12  
13  
14  
15

## 16 References

- 17  
18 1 Health at a Glance 2013:OECD Indicators. Available online: [http://www.oecd.org/els/health-](http://www.oecd.org/els/health-systems/Health-at-a-Glance-2013.pdf)  
19 [systems/Health-at-a-Glance-2013.pdf](http://www.oecd.org/els/health-systems/Health-at-a-Glance-2013.pdf) (Accessed Jan 2016).  
20 2 Chatterji S, Byles J, Cutler D, et al. Health, functioning, and disability in older adults--present status and  
21 future implications. *Lancet* 2015;385(9967):563-75.  
22 3 Rechel B, Doyle Y, Grundy E, et al. How can health systems respond to population ageing? Policy  
23 *Briefing 10 WHO Regional Office for Europe 2009*  
24 [http://www.euro.who.int/\\_data/assets/pdf\\_file/0004/64966/E92560.pdf](http://www.euro.who.int/_data/assets/pdf_file/0004/64966/E92560.pdf) (Accessed Jan 2016).  
25 4 American College of Sports Medicine, Chodzko-Zajko WJ, Proctor DN, et al. American College of Sports  
26 Medicine position stand. Exercise and physical activity for older adults. *Med Sci Sports Exerc*  
27 2009;41(7):1510-30.  
28 5 Dawe RJ, Leurgans SE, Yang J, et al. Association between Quantitative Gait and Balance Measures and  
29 Total Daily Physical Activity in Community-Dwelling Older Adults. *J Gerontol A Biol Sci Med Sci*  
30 2018;73(5):636-642.  
31 6 WorldHealthOrganization. Global recommendations on physical activity for health. 2011.  
32 7 Olesen K, Rod NH, Madsen IE, et al. Does retirement reduce the risk of mental disorders? A national  
33 registry-linkage study of treatment for mental disorders before and after retirement of 245,082 Danish  
34 residents. *Occup Environ Med* 2015;72(5):366-72.  
35 8 Landi F, Calvani R, Tosato M, et al. Age-Related Variations of Muscle Mass, Strength, and Physical  
36 Performance in Community-Dwellers: Results From the Milan EXPO Survey. *J Am Med Dir Assoc*  
37 2017;18(1):88 e17-88 e24.  
38 9 Hawley-Hague H, Horne M, Campbell M, et al. Multiple levels of influence on older adults' attendance  
39 and adherence to community exercise classes. *Gerontologist* 2014;54(4):599-610.  
40 10 Nyman SR, Victor CR. Older people's recruitment, sustained participation, and adherence to falls  
41 prevention interventions in institutional settings: a supplement to the Cochrane systematic review. *Age*  
42 *Ageing* 2011;40(4):430-6.  
43 11 Mikolaizak AS, Lord SR, Tiedemann A, et al. Adherence to a multifactorial fall prevention program  
44 following paramedic care: Predictors and impact on falls and health service use. Results from an RCT a  
45 priori subgroup analysis. *Australas J Ageing* 2018 Mar;37(1):54-61.  
46 12 French DP, Olander EK, Chisholm A, et al. Which behaviour change techniques are most effective at  
47 increasing older adults' self-efficacy and physical activity behaviour? A systematic review. *Ann Behav*  
48 *Med* 2014;48(2):225-34.  
49 13 Murray JM, Brennan SF, French DP, et al. Effectiveness of physical activity interventions in achieving  
50 behaviour change maintenance in young and middle aged adults: A systematic review and meta-  
51 analysis. *Soc Sci Med* 2017;192:125-33.  
52 14 Strigglebout M, Hopman-Rock M, Crone M, et al. Predicting older adults' maintenance in exercise  
53  
54  
55  
56  
57  
58  
59  
60

- 1 participation using an integrated social psychological model. *Health Education Research* 2006;21(1):1-  
2 14.
- 3 15 Devereux-Fitzgerald A, Powell R, Dewhurst A, et al. The acceptability of physical activity interventions  
4 to older adults: A systematic review and meta-synthesis. *Soc Sci Med* 2016;158:14-23.
- 5 16 Jonkman NH, Del Panta V, Hoekstra T, et al. Predicting Trajectories of Functional Decline in 60- to 70-  
6 Year-Old People. *Gerontology*. 2018;64(3):212-221.
- 7 17 Clemson L, Singh MF, Bundy A, et al. LiFE Pilot Study: A randomised trial of balance and strength  
8 training embedded in daily life activity to reduce falls in older adults. *Aust Occup Ther J* 2010;57(1):42-  
9 50.
- 10 18 Clemson L, Fiatarone Singh MA, Bundy A, et al. Integration of balance and strength training into daily  
11 life activity to reduce rate of falls in older people (the LiFE study): randomised parallel trial. *BMJ*  
12 2012;345:e4547.
- 13 19 Campbell M, Fitzpatrick R, Haines A, et al. Framework for design and evaluation of complex  
14 interventions to improve health. *BMJ* 2000;321(7262):694-6.
- 15 20 Paraschiv-Ionescu A, Perruchoud C, Buchser E, et al. Barcoding human physical activity to assess  
16 chronic pain conditions. *PLoS One* 2012;7(2).
- 17 21 Kraft KP, Steel KA, Macmillan F, et al. Why few older adults participate in complex motor skills: a  
18 qualitative study of older adults' perceptions of difficulty and challenge. *BMC Public Health*  
19 2015;15:1186.
- 20 22 Clemson L, Munro J. Conceptual model of habit reforming to improve balance and prevent falls. In:  
21 Pachana NA, editor. *Encyclopaedia of Geropsychology*. 1. Singapore: Springer; 2016. p. 1-10.
- 22 23 Michie S, Richardson M, Johnston M, et al. The behavior change technique taxonomy (v1) of 93  
23 hierarchically clustered techniques: building an international consensus for the reporting of behavior  
24 change interventions. *Ann Behav Med* 2013;46(1):81-95.
- 25 24 Helbostad JL, Vereijken B, Becker C, et al. Mobile Health Applications to Promote Active and Healthy  
26 Ageing. *Sensors (Basel)* 2017;17(3).
- 27 25 Stensvold D, Viken H, Rognmo O, et al. A randomised controlled study of the long-term effects of  
28 exercise training on mortality in elderly people: study protocol for the Generation 100 study. *BMJ open*  
29 2015;5(2).
- 30 26 Arain M, Campbell MJ, Cooper CL, et al. What is a pilot or feasibility study? A review of current  
31 practice and editorial policy. *BMC Med Res Methodol* 2010;10:67.
- 32 27 Browne RH. On the use of a pilot sample for sample size determination. *Stat Med* 1995;14(17):1933-  
33 40.
- 34 28 Billingham SA, Whitehead AL, Julious SA. An audit of sample sizes for pilot and feasibility trials being  
35 undertaken in the United Kingdom registered in the United Kingdom Clinical Research Network  
36 database. *BMC Med Res Methodol* 2013;13:104.
- 37 29 Nasreddine ZS, Phillips NA, Bedirian V, et al. The Montreal Cognitive Assessment, MoCA: a brief  
38 screening tool for mild cognitive impairment. *J Am Geriatr Soc* 2005;53(4):695-9.
- 39 30 Jette AM, Haley SM, Coster WJ, et al. Late life function and disability instrument: I. Development and  
40 evaluation of the disability component. *J Gerontol A Biol Sci Med Sci* 2002;57(4):M209-16.
- 41 31 Haley SM, Jette AM, Coster WJ, et al. Late Life Function and Disability Instrument: II. Development  
42 and evaluation of the function component. *J Gerontol A Biol Sci Med Sci* 2002;57(4):M217-22.
- 43 32 Paraschiv-Ionescu A, Perruchoud C, Rutschmann B, et al. Quantifying dimensions of physical behavior  
44 in chronic pain conditions. *J Neuroeng Rehabil* 2016;13(1):85.
- 45 33 Podsiadlo D, Richardson S. The timed "Up & Go": a test of basic functional mobility for frail elderly  
46 persons. *J Am Geriatr Soc* 1991;39(2):142-8.
- 47 34 Mellone S, Tacconi C, Chiari L. Validity of a Smartphone-based instrumented Timed Up and Go. *Gait*  
48 *Posture* 2012;36(1):163-5.



- 1  
2  
3 35 Rikli R, Jones CJ. Senior Fitness Test Manual. Champaign: Human Kinetics; 2001.
- 4 36 Farrar JT, Young JP, Jr., LaMoreaux L, et al. Clinical importance of changes in chronic pain intensity  
5 measured on an 11-point numerical pain rating scale. *Pain* 2001;94(2):149-58.
- 6 37 Radloff LS. The CES-D scale: a self-report depression scale for research in the general population.  
7 *Applied Psychological Measurement* 1977;1:385-401.
- 8 38 Kempen GI, Yardley L, van Haastregt JC, et al. The Short FES-I: a shortened version of the falls efficacy  
9 scale-international to assess fear of falling. *Age Ageing* 2008;37(1):45-50.
- 10 39 Yardley L, Beyer N, Hauer K, et al. Development and initial validation of the Falls Efficacy Scale-  
11 International (FES-I). *Age Ageing* 2005;34(6):614-9.
- 12 40 Guralnik JM, Simonsick EM, Ferrucci L, et al. A short physical performance battery assessing lower  
13 extremity function: association with self-reported disability and prediction of mortality and nursing  
14 home admission. *J Gerontol* 1994;49(2):M85-94.
- 15 41 Coppin AK, Shumway-Cook A, Saczynski JS, et al. Association of executive function and performance  
16 of dual-task physical tests among older adults: analyses from the InChianti study. *Age Ageing*  
17 2006;35(6):619-24.
- 18 42 Balasubramanian CK. The community balance and mobility scale alleviates the ceiling effects  
19 observed in the currently used gait and balance assessments for the community-dwelling older adults. *J*  
20 *Geriatr Phys Ther* 2015;38(2):78-89.
- 21 43 Tacconi C, Mellone S, Chiari L. UADL: A smartphone application for ubiquitous activity of daily living  
22 monitoring with real-time parameter computation [Presentation at the 2015 World Congress of the  
23 International Society of Posture and Gait Research, Sevilla, Spain]. In press 2015.
- 24 44 EuroQol Group. EuroQol - a new facility for the measurement of health-related quality of life *Health*  
25 *Policy* 1990;16(3):199-208.
- 26 45 Ware J, Jr., Kosinski M, Keller SD. A 12-Item Short-Form Health Survey: construction of scales and  
27 preliminary tests of reliability and validity. *Med Care* 1996;34(3):220-33.
- 28 46 Newman-Beinart NA, Norton S, Dowling D, et al. The development and initial psychometric  
29 evaluation of a measure assessing adherence to prescribed exercise: the Exercise Adherence Rating  
30 Scale (EARS). *Physiotherapy* 2017;103(2):180-5.
- 31 47 Gardner B, Abraham C, Lally P, et al. Towards parsimony in habit measurement: testing the  
32 convergent and predictive validity of an automaticity subscale of the Self-Report Habit Index. *Int J Behav*  
33 *Nutr Act* 2012;9:102.
- 34 48 Schwarzer R, Luszczynska A. Predicting Health Behaviours. Health Action Process Approach. In M.  
35 Conner PNE, & P. Norman, Eds. Maidenhead, UK: McGraw Hill Open University Press 2015.
- 36 49 Brooke J. A quick and dirty usability scale. *Usability evaluation in industry* 1996;189(194):4-7.
- 37 50 Chiari L, van Lummel R, Becker C, et al. Deliverable 2.2: Classification of the user's needs,  
38 characteristics and scenarios - update. 2009.
- 39 51 PreventIT consortium. Feasibility of the adapted LiFE (aLiFE) intervention – a pilot study. ISRCTN  
40 registration: <http://www.isrctn.com/ISRCTN377506052016>
- 41 52 Stiggelbout M, Hopman-Rock M, Crone M, et al. Predicting older adults' maintenance in exercise  
42 participation using an integrated social psychological model. *Health Educ Res* 2006;21(1):1-14.
- 43 53 Prochaska JO, DiClemente CC. Stages and processes of self-change of smoking: toward an integrative  
44 model of change. *J Consult Clin Psychol* 1983;51(3):390-5.
- 45 54 WHO. Global recommendations on physical activity for health. 2010 ISBN: 9789241599979 Available  
46 online: [http://apps.who.int/iris/bitstream/10665/44399/1/9789241599979\\_eng.pdf](http://apps.who.int/iris/bitstream/10665/44399/1/9789241599979_eng.pdf) (accessed 15 Jan  
47 2017).
- 48 55 Schulz KF, Altman DG, Moher D, et al. CONSORT 2010 statement: updated guidelines for reporting  
49 parallel group randomised trials. *BMJ* 2010;340:c332.
- 50 56 Weber M, Belala N, Clemson L, et al. Feasibility and Effectiveness of Intervention Programmes  
51  
52  
53  
54  
55  
56  
57  
58  
59  
60



1  
2  
3 Integrating Functional Exercise into Daily Life of Older Adults: A Systematic Review. *Gerontology*  
4 2018;64(2):172-187.  
5  
6  
7  
8  
9  
10  
11  
12  
13  
14  
15

### 16 **Figure legends**

17  
18 **Figure 1.** The architecture of the eLiFE system. Physical behaviour is continuously monitored  
19 by a smartphone and a smartwatch, connected through a Blue-tooth. The same units are also used  
20 for delivering the intervention. Data are calculated and stored locally on the smartphone and then  
21 sent to a cloud-based server for further processing and storing. The collected information is sent  
22 back to the smartphones in the form of motivational messages and feedback on behaviour.  
23  
24

25 **Figure 2.** PreventIT Flow Diagram  
26  
27  
28  
29  
30  
31  
32  
33  
34  
35  
36  
37  
38  
39  
40  
41  
42  
43  
44  
45  
46  
47  
48  
49  
50  
51  
52  
53  
54  
55  
56  
57  
58  
59  
60

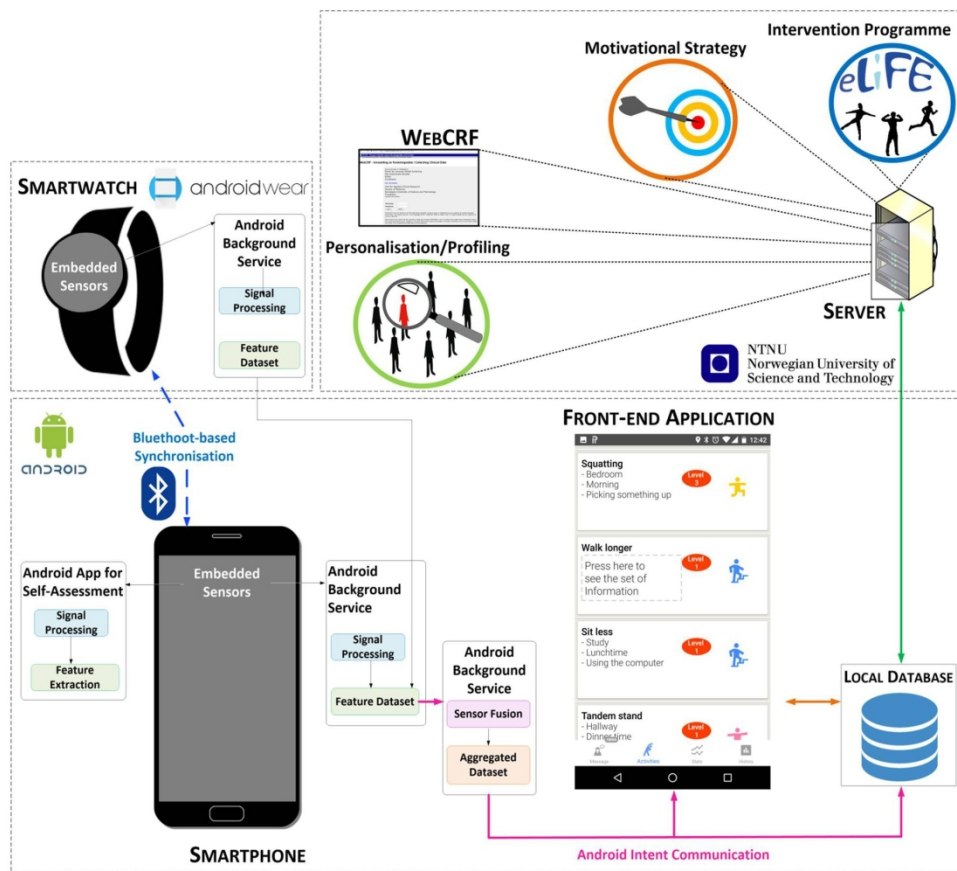

Figure 1. The architecture of the eLiFE system. Physical behaviour is continuously monitored by a smartphone and a smartwatch, connected through a Blue-tooth. The same units are also used for delivering the intervention. Data are calculated and stored locally on the smartphone and then sent to a cloud-based server for further processing and storing. The collected information is sent back to the smartphones in the form of motivational messages and feedback on behaviour.

175x163mm (300 x 300 DPI)

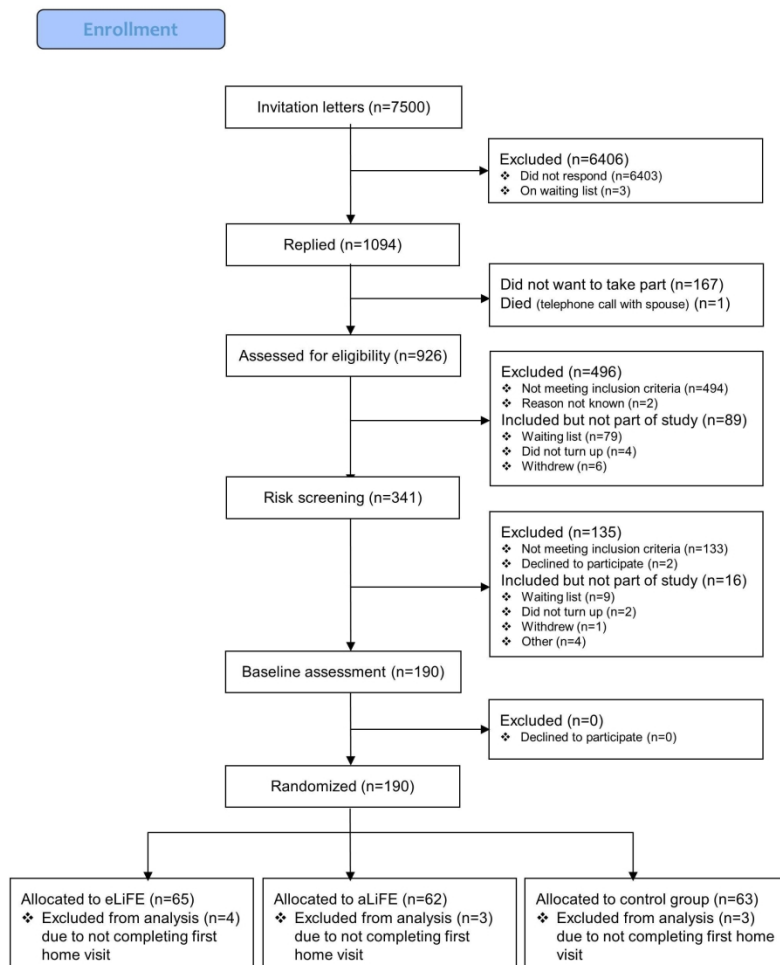

Figure 2. PreventIT Flow Chart

180x260mm (300 x 300 DPI)

# BMJ Open

## Protocol for the PreventIT randomised controlled trial feasibility study of a lifestyle-integrated exercise intervention in young older adults

|                               |                                                                                                                                                                                                                                                                                                                                                                                                                                                                                                                                                                                                                                                                                                                                                                                                                                                                                                                                                                                                                                                                                                                                                                                                                                                                                                                                                                                                                                                                                                                                                                                                                                                                                                                                                                                                                                                                                                                                                                                                                                                                                  |
|-------------------------------|----------------------------------------------------------------------------------------------------------------------------------------------------------------------------------------------------------------------------------------------------------------------------------------------------------------------------------------------------------------------------------------------------------------------------------------------------------------------------------------------------------------------------------------------------------------------------------------------------------------------------------------------------------------------------------------------------------------------------------------------------------------------------------------------------------------------------------------------------------------------------------------------------------------------------------------------------------------------------------------------------------------------------------------------------------------------------------------------------------------------------------------------------------------------------------------------------------------------------------------------------------------------------------------------------------------------------------------------------------------------------------------------------------------------------------------------------------------------------------------------------------------------------------------------------------------------------------------------------------------------------------------------------------------------------------------------------------------------------------------------------------------------------------------------------------------------------------------------------------------------------------------------------------------------------------------------------------------------------------------------------------------------------------------------------------------------------------|
| Journal:                      | <i>BMJ Open</i>                                                                                                                                                                                                                                                                                                                                                                                                                                                                                                                                                                                                                                                                                                                                                                                                                                                                                                                                                                                                                                                                                                                                                                                                                                                                                                                                                                                                                                                                                                                                                                                                                                                                                                                                                                                                                                                                                                                                                                                                                                                                  |
| Manuscript ID                 | bmjopen-2018-023526.R2                                                                                                                                                                                                                                                                                                                                                                                                                                                                                                                                                                                                                                                                                                                                                                                                                                                                                                                                                                                                                                                                                                                                                                                                                                                                                                                                                                                                                                                                                                                                                                                                                                                                                                                                                                                                                                                                                                                                                                                                                                                           |
| Article Type:                 | Protocol                                                                                                                                                                                                                                                                                                                                                                                                                                                                                                                                                                                                                                                                                                                                                                                                                                                                                                                                                                                                                                                                                                                                                                                                                                                                                                                                                                                                                                                                                                                                                                                                                                                                                                                                                                                                                                                                                                                                                                                                                                                                         |
| Date Submitted by the Author: | 05-Dec-2018                                                                                                                                                                                                                                                                                                                                                                                                                                                                                                                                                                                                                                                                                                                                                                                                                                                                                                                                                                                                                                                                                                                                                                                                                                                                                                                                                                                                                                                                                                                                                                                                                                                                                                                                                                                                                                                                                                                                                                                                                                                                      |
| Complete List of Authors:     | <p>Taraldsen, Kristin; Norwegian University of Science and Technology (NTNU), Department of Neuromedicine and Movement Science<br/> Mikolaizak, A. Stefanie; Robert Bosch Krankenhaus<br/> Maier, Andrea; Vrije Universiteit Amsterdam, Department of Human Movement Sciences<br/> Boulton, Elisabeth; University of Manchester, School of Health Sciences; Manchester Academic Health Science Centre<br/> Aminian, Kamiar; Ecole Polytechnique Federale de Lausanne<br/> van Ancum, Jeanine; Vrije Universiteit Amsterdam, Department of Human Movement Sciences<br/> Bandinelli, Stefania; Local Health Unit Toscana Center<br/> Becker, Clemens; RobertBoschKrankenhaus, Geriatric Medicine<br/> Bergquist, Ronny; Norwegian University of Science and Technology (NTNU), Department of Neuromedicine and Movement Science<br/> Chiari, Lorenzo; University of Bologna, Department of Electrical, Electronic and Information Engineering «Guglielmo Marconi»<br/> Clemson, Lindy; University of Sydney, Faculty of Health Sciences<br/> French, David; University of Manchester, School of Psychological Sciences<br/> Gannon, B; The University of Queensland, Centre for Business and Economics of Health<br/> Hawley-Hague, Helen; University of Manchester, School of Health Sciences<br/> Jonkman, Nini ; Vrije Universiteit Amsterdam, Department of Human Movement Sciences<br/> Mellone, Sabato; University of Bologna, Department of Electrical, Electronic and Information Engineering «Guglielmo Marconi»<br/> Paraschiv-Ionescu, Anisoara; Ecole Polytechnique Federale de Lausanne<br/> Pijnappels, Mirjam; Vrije Universiteit Amsterdam, Department of Human Movement Sciences<br/> Schwenk, Michael; Robert-Bosch Krankenhaus<br/> Todd, Chris; University of Manchester, School of Health Sciences<br/> Yang, Fan; University of York, Centre for Health Economics<br/> Zacchi, Anna; Doxee S.p.A<br/> Helbostad, Jorunn<br/> Vereijken, Beatrix; Norwegian University of Science and Technology (NTNU), Department of Neuromedicine and Movement Science</p> |
| <b>Primary Subject            | Medical education and training                                                                                                                                                                                                                                                                                                                                                                                                                                                                                                                                                                                                                                                                                                                                                                                                                                                                                                                                                                                                                                                                                                                                                                                                                                                                                                                                                                                                                                                                                                                                                                                                                                                                                                                                                                                                                                                                                                                                                                                                                                                   |

1  
2  
3  
4  
5  
6  
7  
8  
9  
10  
11  
12  
13  
14  
15  
16  
17  
18  
19  
20  
21  
22  
23  
24  
25  
26  
27  
28  
29  
30  
31  
32  
33  
34  
35  
36  
37  
38  
39  
40  
41  
42  
43  
44  
45  
46  
47  
48  
49  
50  
51  
52  
53  
54  
55  
56  
57  
58  
59  
60

|                            |                                                                                                       |
|----------------------------|-------------------------------------------------------------------------------------------------------|
| Heading</b>:               |                                                                                                       |
| Secondary Subject Heading: | Evidence based practice, Public health, Sports and exercise medicine                                  |
| Keywords:                  | physical activity, muscle strenth, balance, mobile health units, functional decline, behaviour change |
|                            |                                                                                                       |

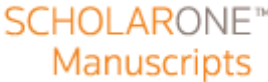

**Title:** Protocol for the PreventIT randomised controlled trial feasibility study of a lifestyle-integrated exercise intervention in young older adults

**Authors:** Kristin Taraldsen<sup>1\*</sup>, A. Stefanie Mikolaizak<sup>2\*</sup>, Andrea B. Maier<sup>3,4\*</sup>

\* Shared first authorship

**Elisabeth Boulton<sup>5</sup>; Kamiar Aminian<sup>6</sup>; Jeanine van Ancum<sup>3</sup>; Stefania Bandinelli<sup>7</sup>; Clemens Becker<sup>2</sup>; Ronny Bergquist<sup>1</sup>; Lorenzo Chiari<sup>8</sup>; Lindy Clemson<sup>9</sup>; David P. French<sup>5</sup>; Brenda Gannon<sup>10</sup>; Helen Hawley-Hague<sup>5</sup>; Nini H. Jonkman<sup>3</sup>; Sabato Mellone<sup>8</sup>; Anisoara Paraschiv-Ionescu<sup>6</sup>; Mirjam Pijnappels<sup>3</sup>; Michael Schwenk<sup>2</sup>; Chris Todd<sup>5</sup>; Fan Yang<sup>11</sup>; Anna Zacchi<sup>12</sup>; Jorunn L Helbostad<sup>1</sup>; Beatrix Vereijken<sup>1</sup>**

**Affiliations:**

<sup>1</sup>Department of Neuromedicine and Movement Science, The Faculty of Medicine and Health Sciences, The Norwegian University of Science and Technology, NTNU, Trondheim, Norway;

<sup>2</sup>Robert Bosch Krankenhaus, Department of Clinical Gerontology and Robert Bosch Medical Foundation, Stuttgart, Germany;

<sup>3</sup>Department of Human Movement Sciences, Faculty of Behavioural and Movement Sciences, Vrije Universiteit Amsterdam, Amsterdam Movement Sciences, The Netherlands;

<sup>4</sup>Department of Medicine and Aged Care, @AgeMelbourne, The Royal Melbourne Hospital, The University of Melbourne, Melbourne, Victoria, Australia;

<sup>5</sup>School of Health Sciences, Faculty of Biology, Medicine and Health, University of Manchester, Manchester UK and Manchester Academic Health Science Centre, and Manchester University NHS Foundation Trust, Manchester, UK;

<sup>6</sup>Laboratory of Movement Analysis and Measurement, Ecole Polytechnique Federale de Lausanne, Lausanne, Switzerland;

<sup>7</sup>Local Health Unit Toscana Center, Florence, Italy;

<sup>8</sup>Department of Electrical, Electronic and Information Engineering «Guglielmo Marconi» - University of Bologna, Bologna, Italy;

<sup>9</sup>The University of Sydney, Faculty of Health Sciences, Lidcombe, New South Wales, Australia

<sup>10</sup>Centre for Business and Economics of Health, University of Queensland, Australia;

<sup>11</sup>Centre for Health Economics, University of York, York, UK;

<sup>12</sup>Doxee S.p.A., Italy.

1  
2  
3 **Corresponding author:**  
4

5 Kristin Taraldsen,  
6

7 Department of Neuromedicine and Movement Science  
8

9 Norwegian University of Science and Technology (NTNU)  
10  
11  
12  
13

14 Postal address:  
15

16 Department of Neuromedicine and Movement Science,  
17

18 NTNU, Faculty of Medicine and Health Sciences,  
19

20 N-7491 Trondheim, Norway  
21  
22  
23  
24

25 E-mail: [Kristin.Taraldsen@ntnu.no](mailto:Kristin.Taraldsen@ntnu.no)  
26

27 Telephone: +47 93 63 32 52  
28  
29  
30  
31

32 **Keywords:** Physical activity, muscle strength, balance, mobile health units, functional  
33 decline, behaviour change  
34  
35  
36  
37  
38  
39

40 **Word count, excluding title page, abstract, references, figures and tables: 5575**  
41  
42  
43  
44

45 **Issue date: 11.04.2018- original version**  
46

47 **30.8.2018- revision 1, primary reason for amendment: revision and clarification**  
48 **for peer-reviewed publication.**  
49

50 **04.12.2018 – revision 2, primary reason for amendment: minor revision of**  
51 **structure of abstract and ...**  
52  
53  
54  
55  
56  
57  
58  
59  
60

## Abstract

**Introduction:** The European population is rapidly ageing. In order to handle substantial future challenges in the health care system, we need to shift focus from treatment towards health promotion. The PreventIT project has adapted the lifestyle-integrated exercise programme (LiFE) and developed an intervention for healthy young older adults at risk of accelerated functional decline. The intervention targets balance, muscle strength and physical activity, and is delivered either via a smartphone application (eLiFE) or by use of paper manuals (aLiFE).

**Methods and analysis:** The PreventIT study is a multicentre, three-armed feasibility RCT, comparing eLiFE and aLiFE against a control group that receives international guidelines of physical activity, it is performed in three European cities in Norway, Germany, and The Netherlands. The primary objective is to assess the feasibility and usability of the interventions, and to assess changes in daily life function as measured by the Late-Life Function and Disability Instrument (LLFDI) scale and a physical behaviour complexity metric. Participants are assessed at baseline, after the six months intervention period, and at one year post-randomisation. Men and women between 61-70 years of age are randomly drawn from regional registries and respondents screened for risk of functional decline to recruit and randomise 180 participants (60 participants per study arm).

**Ethics and dissemination:** Ethical approval was received at all three trial sites. Baseline results are intended to be published by late 2018, with final study findings expected early 2019. Subgroup and further in-depth analyses will subsequently be published.

**Trial registration:** ClinicalTrials.gov, NCT03065088. Registered on 14 February 2017.



**Strengths and limitations of this study:**

- aLiFE integrates individualised and appropriately challenging balance, muscle strength, and physical activities into daily lives of young older adults.
- eLiFE uses a smartphone/smartwatch app to offer a personalised life-style integrated activity programme, based on a risk screening of future functional decline and an individuals' physical performance.
- Technology-supported exercise programme allows participants to monitor their behaviour and receive messages and feedback in real time aiming to change their physical behaviour.
- The twelve month follow-up enables monitoring and evaluation of long-term adherence to smartphone-based and paper-based interventions.
- Potential sources of bias include the selection of participants and loss to follow-up if those who complete the full data collection protocol are systematically different between the three groups.

## BACKGROUND

The European population is rapidly ageing. Average life expectancy has exceeded 80 years across Organisation for Economic Co-operation and Development (OECD) countries,(1) with a concomitant increase in projected years spent with disabilities.(2) In order to tackle future challenges on already overstretched health care systems, it is generally recognised that there needs to be shift of focus from treatment towards promoting active and healthy ageing and prevention of age-related diseases and functional decline.(3)

It is well documented that physical activity improves health and physical function and reduces disability at old age.(4) Increasing physical activity (4) as well as balance (5) and strength (5) training have been described as determinants for maintaining function and ability. According to the World Health Organisation (WHO), physical inactivity is the fourth leading risk factor contributing to death worldwide and increases the risk of adverse health outcomes, such as shortened life expectancy, cardiovascular disease, diabetes, and cancer.(6) Older adults are at increased risk of physical inactivity, with significant decline in activity levels occurring around the time of retirement.(7) Simultaneously, this period of life provides the opportunity to adopt a healthy and active lifestyle, as there is still potential to prevent decline and maintain physical function required to remain active and independent in later life.(8)

In order to shift from an inactive to an active lifestyle, behaviour change is needed. However, uptake of and adherence to physical activity interventions is a challenge, as shown for example in fall prevention (9) and evidence-based strength and balance programmes in older adults.(10) Previous studies demonstrated that high intervention adherence rates can achieve statistically significant and clinically relevant treatment effects.(11) However, participants' activity levels often revert back to previous low activity levels at the end of the intervention period,(12, 13) indicating that interventions must be supported by behavioural change, be acceptable, and be based on theoretical and empirically tested principles.(12, 14, 15)

The PreventIT project (Early risk detection and prevention in ageing people by self-administered ICT-supported assessment and a behavioural change intervention, delivered by use of smartphones and smartwatches), is a European Horizon 2020 ICT and personal health project. The aim is to develop and test a personalised behaviour change intervention on physical activity aimed at young older adults that has the potential to prevent accelerated functional decline at older age.(16)

PreventIT is based on the **LiFE programme** (Lifestyle-integrated Exercise programme) developed by Clemson et al.(17) In LiFE, balance and muscle strengthening activities are embedded within everyday activities. Rather than using a prescribed set of exercises, LiFE activities occur whenever the opportunity for such activity arises during the day. The original LiFE programme was developed for adults 70 years and older and tested in older home-dwelling people. It was found to significantly reduce falls, improve physical function, decrease disability and improve adherence, compared to a traditional exercise programme and a sham intervention.(18) Thus, tailoring exercise at an individual level and integrating it in daily life seems to be a promising approach.

In accordance with the UK Medical Research Council (MRC) guidance (19) on development, evaluation and implementation of complex interventions, the original LiFE programme was customised to the needs of a younger target group. The PreventIT consortium adapted and piloted the LiFE activities in order to make them adequately challenging, complex and meaningful for a younger target population (**aLiFE**) (paper submitted).(20, 21) In addition, the consortium further developed the behavioural change elements of the intervention,(22) mapping these to behaviour change theory and techniques (Table 1).(23) Iterative stages of feasibility testing and evaluation of the aLiFE programme were applied including a proof of concept pilot study (ISRCTN37750605 <https://doi.org/10.1186/ISRCTN37750605>). Subsequently, the aLiFE programme was transferred to a mobile health application system (PreventIT mHealth system),(24) called **eLiFE** (enhanced LiFE) programme, delivering the intervention on smartphones and smartwatches.

In order to assess feasibility and usability, evaluate and further improve the intervention, and to suggest sample size and design for a future Phase III clinical trial, this feasibility study is currently being conducted, comparing eLiFE and aLiFE interventions to a control group.

Table 1. Behaviour change techniques adopted within aLiFE and eLiFE

| Behaviour Change Techniques*                                          | aLiFE Content                          | eLiFE Content                               |
|-----------------------------------------------------------------------|----------------------------------------|---------------------------------------------|
| <b>1. Goals and planning</b>                                          |                                        |                                             |
| 1.1 Goal setting (behaviour – which activities, where and how often). | Daily Routine Chart, Activity Planner. | App content (planning screens), instructor. |

|                                                     |                                                             |                                                                       |
|-----------------------------------------------------|-------------------------------------------------------------|-----------------------------------------------------------------------|
| 1.2 Problem solving.                                | Manual, instructor.                                         | App content, instructor.                                              |
| 1.3 Goal setting (outcome – long term).             | Paper form, instructor.                                     | App content (planning screens), instructor.                           |
| 1.4 Action Planning.                                | Activity Planner, instructor.                               | App content (planning screens), instructor.                           |
| 1.5 Review behavioural goals.                       | Activity Planner, Activity Counter.                         | App content (daily reporting).                                        |
| 1.6 Discrepancy between current behaviour and goal. | Paper form, Activity Planner.                               | App content (motivational messaging, activity reporting).             |
| 1.7 Review outcome goals.                           | Paper form, Activity Planner, Activity Counter, instructor. | App content (motivational messaging, activity reporting).             |
| <b>2. Feedback and monitoring</b>                   |                                                             |                                                                       |
| 2.2 Feedback on behaviour.                          | Instructor.                                                 | App content (real-time feedback).                                     |
| 2.3 Self-monitoring of behaviour.                   | Activity Planner, Activity Counter.                         | App content (activity reporting).                                     |
| 2.4 Self-monitoring of outcomes of behaviour.       | Activity Planner, Activity Counter.                         | App content (motivational messaging).                                 |
| 2.6 Biofeedback                                     | Not included.                                               | System components (accelerometer) and app content (feedback screens). |
| 2.7 Feedback on outcomes of behaviour.              | Instructor.                                                 | App content (real-time feedback).                                     |
| <b>3. Social support</b>                            |                                                             |                                                                       |
| 3.1 Social support.                                 | Instructor.                                                 | App content (motivational messaging).                                 |
| <b>4. Shaping knowledge</b>                         |                                                             |                                                                       |
| 4.1 Instruction on how to perform the behaviour.    | Manual, instructor.                                         | App content (text, pictures, videos).                                 |
| <b>5. Natural consequences</b>                      |                                                             |                                                                       |
| 5.1 Information about health consequences.          | Manual.                                                     | App content (motivational messaging).                                 |

|    |                                       |                            |                                  |
|----|---------------------------------------|----------------------------|----------------------------------|
| 1  |                                       |                            |                                  |
| 2  |                                       |                            |                                  |
| 3  | 5.3 Information about social and      | Manual.                    | App content (motivational        |
| 4  | environmental consequences.           |                            | messaging).                      |
| 5  |                                       |                            |                                  |
| 6  | <b>6. Comparison of behaviour</b>     |                            |                                  |
| 7  |                                       |                            |                                  |
| 8  | 6.1 Demonstrate the behaviour.        | Manual (text, pictures),   | App content (text, pictures,     |
| 9  |                                       | instructor.                | videos).                         |
| 10 |                                       |                            |                                  |
| 11 | 6.2 Social comparison.                | Not included.              | App content (motivational        |
| 12 |                                       |                            | messaging).                      |
| 13 |                                       |                            |                                  |
| 14 | 6.3 Information about others'         | Not included.              | App content (motivational        |
| 15 | approval.                             |                            | messaging).                      |
| 16 |                                       |                            |                                  |
| 17 |                                       |                            |                                  |
| 18 | <b>7. Associations</b>                |                            |                                  |
| 19 |                                       |                            |                                  |
| 20 | 7.1 Prompts / cues.                   | Manual, instructor.        | App content (planning screens).  |
| 21 |                                       |                            |                                  |
| 22 |                                       |                            |                                  |
| 23 | <b>8. Repetition and substitution</b> |                            |                                  |
| 24 |                                       |                            |                                  |
| 25 | 8.1 Behavioural                       | Manual, instructor         | App content (planning screens,   |
| 26 | practice/rehearsal.                   |                            | real-time feedback, motivational |
| 27 |                                       |                            | messaging).                      |
| 28 |                                       |                            |                                  |
| 29 | 8.3 Habit formation.                  | Manual, instructor,        | App content (planning screens,   |
| 30 |                                       | Activity Planner, Activity | real-time feedback, motivational |
| 31 |                                       | Counter.                   | messaging).                      |
| 32 |                                       |                            |                                  |
| 33 | 8.6 Generalisation of a target        | Manual, instructor, Daily  | App content (motivational        |
| 34 | behaviour.                            | Routine Chart, Activity    | messaging).                      |
| 35 |                                       | Planner.                   |                                  |
| 36 |                                       |                            |                                  |
| 37 | 8.7 Graded tasks.                     | Manual, instructor.        | App content (planning screens,   |
| 38 |                                       |                            | real-time feedback, motivational |
| 39 |                                       |                            | messaging).                      |
| 40 |                                       |                            |                                  |
| 41 |                                       |                            |                                  |
| 42 |                                       |                            |                                  |
| 43 |                                       |                            |                                  |
| 44 | <b>10. Reward and threat</b>          |                            |                                  |
| 45 |                                       |                            |                                  |
| 46 | 10.10 Reward (outcome).               | Instructor.                | App content (real-time feedback, |
| 47 |                                       |                            | motivational messaging).         |
| 48 |                                       |                            |                                  |
| 49 | 10.3 Non-specific reward.             | Instructor.                | App content (real-time feedback, |
| 50 |                                       |                            | motivational messaging).         |
| 51 |                                       |                            |                                  |
| 52 |                                       |                            |                                  |
| 53 | <b>12. Antecedents</b>                |                            |                                  |
| 54 |                                       |                            |                                  |
| 55 | 12.1 Restructuring the physical       | Manual, instructor.        | App content (planning screens,   |
| 56 | environment.                          |                            | motivational messaging).         |
| 57 |                                       |                            |                                  |
| 58 |                                       |                            |                                  |
| 59 |                                       |                            |                                  |
| 60 |                                       |                            |                                  |

|                                            |                     |                                                         |
|--------------------------------------------|---------------------|---------------------------------------------------------|
| 12.2 Restructuring the social environment. | Manual, instructor. | App content (planning screens, motivational messaging). |
| <b>15. Self-belief</b>                     |                     |                                                         |
| 15.1 Verbal persuasion about capability.   | Not included.       | App content (motivational messaging).                   |
| 15.3 Focus on past success.                | Not included.       | App content (motivational messaging).                   |

---

\*Using Michie et al, 2013 (23)

## Aims

The aim of the multicentre randomised controlled feasibility trial is to assess the feasibility of eLiFE and aLiFE programmes, integrating activities into daily life, versus a control group, targeting young older adults between 61-70 years. There are 5 main research questions: 1) **Participation:** What are the levels of adherence of young older adults to specific activities and to the entire eLiFE and aLiFE intervention over the course of the study period? 2) **Technology:** What is the acceptability of the eLiFE intervention delivered using technology (smartphones and smartwatches) including user interface, goal setting, feedback, motivational messages, and social interaction? 3) **Feasibility and usability:** What is the feasibility of the eLiFE and aLiFE intervention programmes in a cohort of young older adults: What are the possible harms (adverse events) of the eLiFE or aLiFE intervention? What is the acceptability of eLiFE and aLiFE activities (usefulness, safety, difficulty level, adaptability/personalisation, planning and uptake of exercises)? Are the RCT methods suitable (recruitment, randomisation, follow up, outcomes etc.)? 4) **Estimates of change:** What is the change in function, as measured by two primary clinical outcome measures: the Later Life Function and Disability Instrument (LLFDI) and the behavioural complexity metric, for the eLiFE and the aLiFE interventions compared to the control group? What are the estimated effect sizes for LLFDI, complexity metric, and the secondary clinical outcome measures? 5) **Health Economics Evaluation:** Is it feasible to collect data in order to estimate health care resource utilisation, costs and quality-adjusted life years (QALYs), and model incremental cost-effectiveness ratios (ICERs) of aLiFE and eLiFE compared with the control group over a 6-month and 12-month time period?

## METHODS

### Trial design

The study uses a three arm RCT design, performed at three clinical sites including a total of 180 participants (60 participants at each site; 20 participants in each arm per site). Inclusion of participants started in March 2017 with a 6-months intervention period and 12-month follow up from baseline lasting until August 2018.

### Study setting and test procedures

The three participating study sites are Trondheim, Norway; Amsterdam, The Netherlands; and Stuttgart, Germany. Telephone screening, risk screening, medical assessment as well as three on-site assessments (T1, T2, T3) are undertaken in university facilities (NTNU Trondheim and Vrije Universiteit Amsterdam) and academic hospital (Robert Bosch Krankenhaus, Stuttgart). All other participant contact is through home visits or telephone communication. Participants are assessed at baseline (T1) within 6 weeks of initial screening, post-test (T2) 182 days after the first home visit ( $\pm 2$  weeks), and follow-up after 12 months (T3) (364 days  $\pm 4$  weeks after the first home visit). Trained assessors (blinded to group allocation) perform all assessments at the collaborating centres. Each assessment lasts approximately 1.5 to 2.5 hours.

### Eligibility criteria

Persons born between 01/01/1947 and 31/12/1956 (61-70 years of age at recruitment begin) were invited to participate via mail. Persons within the target group were randomly selected from three local population registries (The National Registry in Norway, the Municipality Registry of Amsterdam, and the Stuttgart Registry in Germany). The inclusion and exclusion criteria are presented in Table 2. Eligibility for participation is determined through a telephone interview, a risk screening for functional decline, and a medical screening. Rates of eligibility at each stage of the inclusion process are monitored.

Table 2. Inclusion and exclusion criteria.

|                     | Inclusion criteria                                  | Exclusion criteria                                                                |
|---------------------|-----------------------------------------------------|-----------------------------------------------------------------------------------|
| Telephone screening | Between 61 and 70 years of age                      | Current participation in an organised exercise class >1 per week                  |
|                     | Retired (more than 6 months, <50% paid/unpaid work) | Moderate-intensity physical activity $\geq 150$ min/week in the previous 3 months |

|                          |                                                  |                                                                                     |
|--------------------------|--------------------------------------------------|-------------------------------------------------------------------------------------|
|                          | Community dwelling                               | Travels >2 months planned during intervention period                                |
|                          | Able to read a newspaper or text on a smartphone |                                                                                     |
|                          | Speaks Norwegian/Dutch/German                    |                                                                                     |
|                          | Able to walk 500 m without walking aid           |                                                                                     |
|                          | Available for home visits the following 6 weeks  |                                                                                     |
| <b>Risk screening</b>    | “At risk” for functional decline                 | Cognitive impairment (Montreal Cognitive Assessment, MOCA <24 points)               |
|                          |                                                  | Acute depression (STU and AMS)                                                      |
| <b>Medical screening</b> |                                                  | Medical condition (heart failure New York Heart Association (NYHA) class III and IV |
|                          |                                                  | Acute myocardial infarction last 6 months or unstable angina                        |
|                          |                                                  | Pericarditis, myocarditis, endocarditis in the last 6 months                        |
|                          |                                                  | Symptomatic aortic stenosis; cardiomyopathy                                         |
|                          |                                                  | Resting blood pressures of a systolic >180 mmHg or diastolic >100 mmHg or higher    |
|                          |                                                  | Chronic Obstructive Pulmonary Disease (COPD) Gold class III and IV                  |
|                          |                                                  | Uncontrolled asthma at least 2 exacerbation in the last 6 months                    |
|                          |                                                  | Amputated lower extremities                                                         |
|                          |                                                  | Active cancer treatment during last 6 months                                        |
|                          |                                                  | Ankylosing spondylitis                                                              |
|                          |                                                  | History of schizophrenia                                                            |
|                          |                                                  | Parkinson’s disease                                                                 |
|                          |                                                  | Cerebrovascular accident last 6 months                                              |
|                          |                                                  | Epilepsy treated with medication                                                    |
|                          |                                                  | Severe rheumatoid arthritis (RA) interfering with mobility                          |



|                         |  |                                                                                                     |
|-------------------------|--|-----------------------------------------------------------------------------------------------------|
|                         |  | Fracture of lumbar spinal vertebra/thoracic spinal vertebra or lower extremity in the last 6 months |
|                         |  | 3 fractures in the last 2 years due to severe osteoporosis                                          |
|                         |  | Acute depression (TRD)                                                                              |
| After screening process |  | Spouse/living together with an already included participant in this trial                           |

TRD: Clinical site Trondheim, STU: Clinical site Stuttgart, AMS: Clinical site Amsterdam

### Sample size and recruitment

No sample size calculation was performed for this study as it is a feasibility study not designed to conclude on effectiveness. However, based on a Norwegian population-based study (25) the sample size (n=180) is estimated to be large enough to estimate critical parameters (26), which equals twice the minimum required number of participants suggested (2x n=90) as a general rule to estimate a parameter.(27, 28)

Participants are drawn from the general population with the purpose of identifying those estimated to be at risk of accelerated functional decline. The number required to invite in order to reach 180 participants is not predefined, due to insufficient knowledge about ability/function in this age group and because the risk screening tools (see below) are newly developed.(16) A contact list was provided for home-dwelling individuals between 61 and 70 years of age living in Trondheim, Amsterdam, and Stuttgart, stratified by age and with even distribution of men and women in each age stratum. The initial draw from each local registry was set at 2000 persons, with the intention of performing a second draw if necessary.

### Screening

We recruited persons who actively replied to their respective study site by telephone or email following the mailing and invited them to undergo a multi-step screening. Screening started with a structured **telephone interview** to determine interest and eligibility, which amongst other criteria included being retired and currently not undertaking more than 150 min of moderate/vigorous physical activity per week (Table 2). Eligible participants are then invited

1  
2  
3 to an on-site risk screening and medical assessment (Table 2). All participants sign an informed  
4 consent form prior to commencing the on-site assessments.  
5  
6

7 An online web-based tool developed through the PreventIT project, (**the PreventIT risk**  
8 **screening tool**), is used to identify participants' risk for functional decline.(16) This is a newly  
9 developed tool, where the risk for functional decline over the next nine years is estimated and  
10 participants are classified as being at "low risk", "medium risk", or "high risk". At time of  
11 commencing recruitment, the tool had not yet been validated. Initially only participants  
12 identified as being at "medium risk" were to be included in the study, as prior analyses in other  
13 cohort data indicated that this would be a third of potential participants.(16) The telephone  
14 screening, which preceded on-site screening and assessment, was designed to exclude the  
15 majority of 'low risk' participants. Subsequently applying the risk screening tool on the selected  
16 sample showed that only about 10% of individuals invited for face-to-face assessment are  
17 classified as 'medium risk' and hence eligible for inclusion. Therefore, the selection of  
18 participants based on the risk-screening tool was discontinued and the risk screening tool is  
19 now applied to estimate and describe the participants' specific risk for functional decline within  
20 the recruited cohort. Participants who complete the face-to-face risk screening and are not  
21 excluded due to cognitive impairment (MOCA >24),(29) are invited to a **medical screening** to  
22 ensure participation in an exercise intervention is not contraindicated. When all inclusion  
23 criteria are met, participants are invited to perform a **full baseline assessment** (T1).  
24  
25  
26  
27  
28  
29  
30  
31  
32  
33  
34  
35  
36

### 37 **Data collection and outcome measures**

38  
39  
40 All eligible participants undergo a phone screening, risk screening, medical screening and three  
41 measurements: one at entry into the study (baseline assessment, T1), one after the 6-month  
42 intervention period (T2) and one after completing the 6 months passive follow-up period (12-  
43 months assessment, T3). Table 3 highlights the measures collected, Table 4 provides a summary  
44 of the schedule of enrolment, interventions, and assessments, and Table 5 provides an overview  
45 of intervention timeframe.  
46  
47  
48  
49  
50

### 51 **Blinding**

52  
53 All pre-intervention measures are assessed by trained research staff and the medical screening  
54 by medically qualified members of the research teams at the respective sites prior to  
55 randomisation. Post-intervention measures are collected by personnel blinded to group  
56 allocation. Due to the nature of the intervention, it is not possible to blind participants or the  
57  
58  
59  
60

1  
2  
3 instructors delivering the intervention. Outcome measures that identify group allocation (e.g.  
4 technology acceptability questionnaires) are collected by unblinded research staff.  
5  
6

### 7 **Outcome measures**

8  
9 All outcome measures are listed in Table 3 and include socio-demographic data, outcomes  
10 regarding general health and function, medical history, medication use, neuropsychological  
11 assessments, measures of physical ability, and quality of life measures. Further data are  
12 collected for economic evaluation purposes. During the 12-month follow-up period monthly  
13 adherence rates are monitored and detailed information about adherence to the interventions is  
14 collected during the 6- (T2) and 12-months (T3) assessments. Experience with the programme,  
15 motivation and behaviour change outcome measures, as well as outcome measures regarding  
16 willingness to participate, usability of technology, and acceptability of the intervention are  
17 collected after the active (first 6 months) and passive follow up period (further 6 months).  
18  
19

20  
21 Among all outcome measures, two are the primary clinical outcomes that are related to change  
22 in function (objective 4) and measured using the **Late-Life Function and Disability**  
23 **Instrument (LLFDI)** (30, 31) and a **complexity metric**,<sup>(20)</sup> further developed and adapted  
24 within the project to assess **behavioural complexity** in the domains of physical activity, sleep,  
25 and social participation.  
26  
27

28  
29 The Late-Life Function and Disability Instrument (LLFDI) was developed as a comprehensive  
30 questionnaire assessing function and disability for use in community-dwelling older adults.<sup>(30,</sup>  
31 31) The LLFDI contains items that represent functional limitations (inability to perform discreet  
32 physical tasks encountered in daily routines) and disability (inability to take part in major life  
33 tasks and social roles). The LLFDI assesses function in 32 physical activities (in three  
34 dimensions: upper extremity, basic lower extremity, and advanced lower extremity) and  
35 disability in 16 major life tasks.  
36  
37

38  
39 Physical activity and sleep data are collected via physical activity monitoring. After each  
40 measurement point (T1, T2, T3), participants' physical activity is monitored for 7 consecutive  
41 days using activity monitors at the lower back (fixed using adhesive tape) and the wrist (fixed  
42 in an elastic wrist band) (AX3 sensors from Axivity: <http://axivity.com/product/ax3>).  
43 Assessment on social interaction is based on detection of outdoor walking derived from the  
44 timing and the number of steps of walking episodes. Frequency and number of SMSs and phone  
45 calls and GPS statistics are also used as possible social interaction measures. These statistics  
46 are anonymous, without identifying the caller/sender. Data on physical behaviour are  
47  
48  
49  
50  
51  
52  
53  
54  
55  
56  
57  
58  
59  
60

1  
2  
3 represented as time series embedding fundamental activity characteristics (i.e., type, duration,  
4 and intensity). The concept of **complexity** in physical behaviour postulates that high functional  
5 status is characterised by freedom of movement in terms of flexibility, ability to successfully  
6 achieve daily tasks, physical performance, diversity of activities, and participation in social life.  
7  
8 On the other hand, advanced ageing and age-related adverse events may be characterised by  
9 progressive movement impairment, difficulties with daily tasks, and limitation of activities and  
10 social life, i.e., less complex physical behaviour.(32)  
11  
12  
13  
14

15  
16 As part of the on-site assessments, *self-administered tests* of mobility, balance and functional  
17 strength are used, where participants use a smartphone app to perform the “Timed Up and  
18 Go”,(33) “Tandem stance, eyes open”, and “Five times sit-to-stand” tests by following  
19 instructions in the app, with no additional guidance from the assessor. This test battery is  
20 developed as part of the PreventIT project, and the acceptance of self-administered tests will be  
21 evaluated. The smartphone is worn in an elastic band around the participant’s waist during the  
22 self-administered tests, from which parameters such as sit-to-stand duration, jerk during sit-to-  
23 stand, mean step time, variability of step time, and interstride trunk sway in anterior-posterior  
24 and medio-lateral directions can be obtained.(34) Participants also perform assessor-guided  
25 versions of the Timed Up and Go, Tandem stance (eyes open and closed), Five times sit-to-  
26 stand, and the 30-second chair stand test originally from the Senior Fitness Test,(35) during  
27 which the participants ‘wears’ the smartphone to record movement parameters as during the  
28 self-administered tests.  
29  
30  
31  
32  
33  
34  
35  
36  
37  
38  
39  
40  
41  
42  
43  
44  
45  
46  
47  
48  
49  
50  
51  
52  
53  
54  
55  
56  
57  
58  
59  
60

Table 3. List of assessments and outcome measures collected during telephone screening, risk screening, medical screening, baseline assessment, after 6 months active intervention and further 6 months passive follow up.

|                                                                                                                                                                                                                                                                                                              | TS | RS | MS | T1 | T2 | T3 | O |
|--------------------------------------------------------------------------------------------------------------------------------------------------------------------------------------------------------------------------------------------------------------------------------------------------------------|----|----|----|----|----|----|---|
| <b>Socio demographic</b>                                                                                                                                                                                                                                                                                     |    |    |    |    |    |    |   |
| Age, gender, employment status, living arrangements (community-dwelling or residential aged care facility), number of co-habitants, years of education                                                                                                                                                       | ✓  |    |    |    |    |    | — |
| Economic satisfaction (good, sufficient, bad/poor)                                                                                                                                                                                                                                                           |    | ✓  |    |    |    |    | — |
| Prior experience with using smartphone technology (yes/no)                                                                                                                                                                                                                                                   |    |    |    | ✓  |    |    | — |
| <b>General health and function</b>                                                                                                                                                                                                                                                                           |    |    |    |    |    |    |   |
| Ability to walk 500m without walking aid                                                                                                                                                                                                                                                                     | ✓  |    |    |    |    |    | — |
| Ability to read newspaper in print and on a smartphone                                                                                                                                                                                                                                                       | ✓  |    |    |    |    |    | — |
| Participation in an organised exercise group > 1 per week (yes/no)                                                                                                                                                                                                                                           | ✓  |    |    |    | ✓  | ✓  | S |
| Currently undertaking 150 minutes or more in moderate-intensity PA per week (yes/no)                                                                                                                                                                                                                         | ✓  |    |    |    | ✓  | ✓  | S |
| Amount of moderate-intensity PA undertaken per week (hardly active; mostly seated activities; light-intensity PA (2-4 hours per week); moderate-intensity PA (1-2 hours per week) or light-intensity PA (>4 hours per week); moderate-intensity >3 hours per week; high-intensity PA several times per week) | ✓  |    |    |    | ✓  | ✓  | S |

|                                                                                                                                                                                                                                   |   |   |   |          |          |          |
|-----------------------------------------------------------------------------------------------------------------------------------------------------------------------------------------------------------------------------------|---|---|---|----------|----------|----------|
| Late-Life Function and Disability Instrument, LLFDI, to assess meaningful change in function (person's ability to do discrete actions/activities) and disability (person's performance of socially defined tasks) <b>(30, 31)</b> | ✓ | ✓ | ✓ | <b>P</b> |          |          |
| <b>Medical history and medication use</b>                                                                                                                                                                                         |   |   |   |          |          |          |
| 'Have you seen a doctor for being diagnosed for having problems with your joints' <sup>a</sup>                                                                                                                                    | ✓ |   | ✓ | ✓        | —        |          |
| 'Have you seen a doctor for being diagnosed for having problems with your heart' <sup>b</sup>                                                                                                                                     | ✓ |   | ✓ | ✓        | —        |          |
| Medications used (total number, type, frequency, dosage)                                                                                                                                                                          | ✓ | ✓ | ✓ | ✓        | <b>S</b> |          |
| Fall history (count over last 12 months)                                                                                                                                                                                          |   |   | ✓ | ✓        | ✓        | <b>S</b> |
| Pain during rest and walking (numeric scale, score 0-10) <b>(36)</b>                                                                                                                                                              |   |   | ✓ | ✓        | ✓        | <b>S</b> |
| Blood pressure (mmHg) in lying and standing (after 1 and 3 minutes); pulse, vision, hearing                                                                                                                                       |   | ✓ |   |          |          | —        |
| Comorbidities (number, type, date of diagnosis and treatment)                                                                                                                                                                     |   | ✓ |   |          |          | —        |
| Height (cm), weight (kg)                                                                                                                                                                                                          |   | ✓ |   |          |          | —        |
| Regular alcohol consumption per week (units)                                                                                                                                                                                      | ✓ |   |   |          |          | —        |
| <b>Neuropsychological</b>                                                                                                                                                                                                         |   |   |   |          |          |          |
| Center for Epidemiologic Studies Depression Scale (CES-D score) to assess symptoms of depression and mood (score range 0-60) * <b>(37)</b>                                                                                        | ✓ |   | ✓ | ✓        | <b>S</b> |          |
| 7- Item Short Version Falls Efficacy Scale-International (FES-I) (score) <b>(38)</b> plus 3 additional FES-I items to assess "fear of falling" * (39)                                                                             | ✓ |   | ✓ | ✓        | <b>S</b> |          |

|                            |                                                                                                                                                                                                                 |   |    |   |   |          |          |          |
|----------------------------|-----------------------------------------------------------------------------------------------------------------------------------------------------------------------------------------------------------------|---|----|---|---|----------|----------|----------|
| 1<br>2<br>3<br>4<br>5<br>6 | Montreal Cognitive Assessment tool, MoCA (converted MoCA score) to assess cognitive function (score $\geq$ 30) * <b>(29)</b>                                                                                    | ✓ |    | ✓ | ✓ | <b>S</b> |          |          |
| 7                          | <b>Physical</b>                                                                                                                                                                                                 |   |    |   |   |          |          |          |
| 8<br>9<br>10<br>11         | Gait speed over 4m (usual pace) <b>(40)</b> and 7m (usual pace <u>and</u> as fast as possible) <b>(41)</b> (best of two trials per measure, m/sec)                                                              | ✓ | \$ | ✓ | ✓ | <b>S</b> |          |          |
| 12<br>13<br>14             | Hand grip strength using a dynamometer (kg, max score of 3 reps per hand, using the protocol of the inChianti study)                                                                                            | ✓ |    |   | ✓ | ✓        | —        |          |
| 15<br>16<br>17             | Five times-sit-to-stand to assess functional strength <b>(40)</b>                                                                                                                                               |   |    | ✓ | ✓ |          | <b>S</b> |          |
| 18                         | <b>Physical – balance</b>                                                                                                                                                                                       |   |    |   |   |          |          |          |
| 19<br>20<br>21             | Able to perform ‘Tandem stance’ for 10 sec with eyes open (yes/no)                                                                                                                                              | ✓ |    |   |   |          | <b>S</b> |          |
| 22<br>23<br>24<br>25       | Community Balance and Mobility Scale (CB&MS) used to measure higher level balance and mobility <b>(42)</b>                                                                                                      |   |    |   | ✓ | ✓        | ✓        | <b>S</b> |
| 26<br>27                   | Static balance measured using the 8-Level Balance scale <b>(18)</b>                                                                                                                                             |   |    |   | ✓ | ✓        | ✓        | <b>S</b> |
| 28<br>29<br>30<br>31<br>32 | Physical – <i>instrumented</i> (participants have a smartphone attached to their lower back, instructions are provided by the assessor. Activity is recorded for the duration of the assessment)                |   |    |   |   |          |          |          |
| 33<br>34                   | 30-second chair stand is completed to quantify strength <b>(35)</b>                                                                                                                                             |   |    |   | ✓ | ✓        | ✓        | <b>S</b> |
| 35<br>36<br>37<br>38<br>39 | Timed Up and Go <b>(33)</b> to measure sit-to-stand duration and movement jerk, mean step time, variability of step time, interstride trunk sway in anterior-posterior and medio-lateral directions <b>(34)</b> |   |    |   | ✓ | ✓        | ✓        | <b>S</b> |

|                            |                                                                                                                                                                                                                                                                 |   |   |   |          |
|----------------------------|-----------------------------------------------------------------------------------------------------------------------------------------------------------------------------------------------------------------------------------------------------------------|---|---|---|----------|
| 1<br>2<br>3<br>4<br>5      | Tandem stance, 30 seconds, eyes closed, to assess sway in anterior-posterior and medio-lateral directions                                                                                                                                                       | ✓ | ✓ | ✓ | <b>S</b> |
| 6<br>7                     | Five times sit-to-stand to quantify strength and measure sit-to-stand duration                                                                                                                                                                                  |   |   | ✓ | <b>S</b> |
| 8<br>9<br>10<br>11         | Tandem stance, 30 seconds, eyes open, to assess sway in anterior-posterior and medio-lateral directions                                                                                                                                                         |   |   | ✓ | <b>S</b> |
| 12<br>13<br>14             | <i>Physical – self administered (Instructions are provided in written form (paper and smartphone) and acoustic ques are provided through the smartphone)</i>                                                                                                    |   |   |   |          |
| 15<br>16<br>17<br>18<br>19 | Timed Up and Go <b>(33)</b> is completed to measure sit-to-stand duration and movement jerk, mean step time, variability of step time, interstride trunk sway in anterior-posterior and medio-lateral directions <b>(34)</b>                                    | ✓ |   | ✓ | <b>S</b> |
| 20<br>21<br>22             | Tandem stance, 15 seconds, eyes closed, to assess sway in anterior-posterior and medio-lateral directions                                                                                                                                                       | ✓ |   |   | <b>S</b> |
| 23<br>24<br>25<br>26       | Tandem stance, 15 seconds, eyes open, to assess sway in anterior-posterior and medio-lateral directions                                                                                                                                                         |   |   | ✓ | <b>S</b> |
| 27<br>28                   | Five times sit-to-stand to quantify strength and measure sit-to-stand duration                                                                                                                                                                                  | ✓ |   | ✓ | <b>S</b> |
| 29<br>30                   | <b>Physical – Sensor-derived data</b>                                                                                                                                                                                                                           |   |   |   |          |
| 31<br>32<br>33<br>34       | Behavioural complexity of PA and sleep measured through activity monitoring (data collection for 7 continuous days) (type, duration, intensity)                                                                                                                 | ✓ | ✓ | ✓ | <b>P</b> |
| 35<br>36<br>37<br>38<br>39 | Physical activity <b>(43)</b> (a set of sensor-based features extracted from signals, including the percentages of sedentary, active, and walking times, duration and intensity (metabolic equivalent) of the activities, and gait and turning characteristics) | ✓ | ✓ | ✓ | <b>S</b> |



1  
2  
3  
4  
5  
6  
7  
8  
9  
10  
11  
12  
13  
14  
15  
16  
17  
18  
19  
20  
21  
22  
23  
24  
25  
26  
27  
28  
29  
30  
31  
32  
33  
34  
35  
36  
37  
38  
39  
40  
41  
42  
43  
44  
45  
46

---

**Health economics / Quality of Life**

---

EuroQol-5D, EQ-5D-5L to measure quality of life and as a utility-based quality of life instrument will be used for estimating QALYs (descriptive profile and a single index value for health-related quality of life) **(44)** ✓ ✓ ✓ **S**

12-Item Short Form survey, SF-12, to measure function and well-being / quality of life **(45)** ✓ ✓ ✓ **S**

A resource-use questionnaire is used to ascertain health resource utilisation (e.g. GP visits, medication use, and health care cost from a societal perspective) ✓ ✓ ✓ **S**

---

**Adherence (monthly follow-up during active and passive intervention period)**

---

Number of visits/calls successfully completed during the intervention period **S**

Withdrawals from intervention (n) **S**

PreventIT mHealth system use after 6 months (eLiFE only) **S**

Uptake and adherence to recommendations/LiFE (all 3 intervention arms, monthly question) was assessed via email (by use of a secure web-based form) or post including one reminder. "Over the last seven days, did you perform the recommended level of physical activity?" The response options are as follows: i) yes, I did more than I planned; ii) yes, I did them all; iii) yes, but not as much as I intended; iv) no, I did not feel well; v) no, I forgot; vi) No, I did not have time; vii) No, I don't like these activities. The control group's response is identical to the options from the active arm, except the generic term "physical activity" is used instead of "activities". **S**

Adherence to the recommendations/LiFE (all 3 intervention arms, at post-test and follow-up) and validation of the monthly adherence questions will be evaluated by use of the Exercise ✓ ✓ **S**

---

|                                                                                                                                                          |   |   |     |
|----------------------------------------------------------------------------------------------------------------------------------------------------------|---|---|-----|
| Adherence Ratio Scale (EARS) (46)                                                                                                                        | ✓ | ✓ | S   |
| <b>Experience, motivation and behavioural change</b>                                                                                                     |   |   |     |
| Self-Reported Behavioural Automaticity Index to assess habit formation (score, 7-point Likert scale) (47)                                                | ✓ | ✓ | S   |
| Level of ease or difficulty in engaging with the intervention and integrating balance, strength, and PA into everyday life (score, 7-point Likert scale) | ✓ | ✓ |     |
| Motivational aspects of the intervention (score, 7-point Likert scale)                                                                                   | ✓ | ✓ | S   |
| <b>Willingness to participate</b>                                                                                                                        |   |   |     |
| Recruitment numbers, dropouts (n), CONSORT (participant numbers through trial progression)                                                               |   |   |     |
| Health Action Process Approach (HAPA) to measure participants' motivation (48)                                                                           | ✓ | ✓ | ✓ S |
| <b>Usability of technology (eLiFE only)</b>                                                                                                              |   |   |     |
| The System Usability Scale (49) at post-test and 12 months follow-up                                                                                     | ✓ | ✓ | S   |
| The Telehealthcare Satisfaction Questionnaire – Wearable Technology (TSQ-WT) (50) at post-test and 12 months follow-up                                   | ✓ | ✓ | S   |
| Issues logs from eLiFE participants will be summarized and described                                                                                     |   |   |     |
| PreventIT mHealth system feasibility, adherence and progression                                                                                          | ✓ | ✓ | S   |
| Usability technology (questionnaire)                                                                                                                     | ✓ | ✓ | S   |
| Data from PreventIT mHealth system                                                                                                                       | ✓ | ✓ | S   |

---

|    |                                                                                                          |   |     |
|----|----------------------------------------------------------------------------------------------------------|---|-----|
| 1  |                                                                                                          |   |     |
| 2  |                                                                                                          |   |     |
| 3  | - PA sensors (daily distribution of walking, sedentary time and active intervals)                        |   |     |
| 4  |                                                                                                          |   |     |
| 5  | - Daily reporting of activities (strength and balance goals achieved?)                                   |   |     |
| 6  |                                                                                                          |   |     |
| 7  | - Use of smartphone (number of phone calls, SMS, number of contacts, GPS location (STU and               |   |     |
| 8  | TRD only)                                                                                                |   |     |
| 9  |                                                                                                          |   |     |
| 10 |                                                                                                          |   |     |
| 11 | - Use of application (usage, changes in activity selection)                                              |   |     |
| 12 |                                                                                                          |   |     |
| 13 | - Difficulties with technology (via an Issue Log)                                                        |   |     |
| 14 |                                                                                                          |   |     |
| 15 | Acceptability of the intervention                                                                        | ✓ | S   |
| 16 |                                                                                                          |   |     |
| 17 | Focus groups (10 participants per intervention arm, at each site): qualitative analysis of               | ✓ | S   |
| 18 | narratives of experience of recruitment process, randomisation process, screening and                    |   |     |
| 19 | assessments, home visits, instructors, tools used (paper-based or technology), support in                |   |     |
| 20 | intervention period, activities undertaken, ideas for improvement. Qualitative data will also be         |   |     |
| 21 | used to evaluate usability of technology.                                                                |   |     |
| 22 |                                                                                                          |   |     |
| 23 |                                                                                                          |   |     |
| 24 |                                                                                                          |   |     |
| 25 | Focus groups (with all assessors and instructors): qualitative analysis of narratives of                 | ✓ | S   |
| 26 | recruitment process, training, successes and challenges in delivering intervention, ideas for            |   |     |
| 27 | improvement.                                                                                             |   |     |
| 28 |                                                                                                          |   |     |
| 29 | Issues logs from the instructors will be evaluated related to acceptability from the instructors'        |   | S   |
| 30 | perspectives                                                                                             |   |     |
| 31 |                                                                                                          |   |     |
| 32 |                                                                                                          |   |     |
| 33 | Acceptability questionnaire ( <b>51</b> ) with rating of helpfulness of a/eLiFE activities for improving | ✓ | ✓ S |
| 34 | balance, strength, PA; perceived safety during a/eLiFE practice; perceived level of difficulty,          |   |     |
| 35 | activity preference, adaptability of activities to fit individual lifestyles and daily activities        |   |     |
| 36 |                                                                                                          |   |     |
| 37 |                                                                                                          |   |     |
| 38 | Adverse events – intervention related and unrelated                                                      |   | S   |
| 39 |                                                                                                          |   |     |

---

1  
2  
3 \* assessment is part of the risk screening and eligibility criteria, as well as being an outcome measure. \$ only 7 meter walk at fast pace was assessed during  
4 the RS. *TS = Telephone screening, RS= Risk screening, MS = Medical Screening, BA=Baseline Assessment, 6mth = Assessment 6mths post randomisation,*  
5 *12mth= Assessment 12mth post randomisation, O=Outcome measure, S=secondary, P=Primary, -=not an outcome measure, TRD= clinical site Trondheim,*  
6 *Norway, STU= clinical site Stuttgart, Germany, PA= Physical activity.* <sup>a</sup>question is answered yes/no, and if “yes”, if any arthrosis, rheumatologic diseases, or  
7 other arthropathies or joint disorders are registered. <sup>b</sup>question is answered yes/no, and if “yes”, if any heart failure, myocardial infarction, cardiac  
8 dysrhythmias or arrest, valvular disease, or other ischemic heart disease are registered, and if “no”, if any cerebrovascular disease or stroke,  
9 hypertension/high blood pressure, or peripheral artery disease are registered.  
10  
11  
12  
13  
14  
15  
16  
17  
18  
19  
20  
21  
22  
23  
24  
25  
26  
27  
28  
29  
30  
31  
32  
33  
34  
35  
36  
37  
38  
39  
40  
41  
42  
43  
44  
45  
46

Table 4. Schedule of enrolment, interventions, and assessments

|                                     | Study period    |                 |                |            |                 |                  |     |                 |    |                 |
|-------------------------------------|-----------------|-----------------|----------------|------------|-----------------|------------------|-----|-----------------|----|-----------------|
|                                     | Enrolment       |                 | Pre-allocation | Allocation | Post-allocation |                  |     |                 |    |                 |
| Time point                          | -t <sub>2</sub> | -t <sub>1</sub> | T1             | 0          | PA <sub>1</sub> | HV1 <sup>§</sup> | T2  | PA <sub>2</sub> | T3 | PA <sub>3</sub> |
| ENROLMENT                           |                 |                 |                |            |                 |                  |     |                 |    |                 |
| Telephone screening                 | x               |                 |                |            |                 |                  |     |                 |    |                 |
| Risk screening                      |                 | x               |                |            |                 |                  |     |                 |    |                 |
| Medical Screening                   |                 | x               |                |            |                 |                  |     |                 |    |                 |
| Randomisation                       |                 |                 |                | x          |                 |                  |     |                 |    |                 |
| ASSESSMENT *                        |                 |                 |                |            |                 |                  |     |                 |    |                 |
| Baseline                            |                 |                 | x              |            |                 |                  |     |                 |    |                 |
| PA monitoring                       |                 |                 |                |            | x               |                  |     | x               |    | x               |
| Reassessment                        |                 |                 |                |            |                 |                  | x   |                 |    |                 |
| Follow-up                           |                 |                 |                |            |                 |                  |     |                 | x  |                 |
| INTERVENTION (active intervention)  |                 |                 |                |            |                 |                  |     |                 |    |                 |
| eLiFE                               |                 |                 |                |            |                 | x — x            |     |                 |    |                 |
| aLiFE                               |                 |                 |                |            |                 | x — x            |     |                 |    |                 |
| Control Group                       |                 |                 |                |            |                 | x                |     |                 |    |                 |
| INTERVENTION (passive intervention) |                 |                 |                |            |                 |                  |     |                 |    |                 |
| eLiFE                               |                 |                 |                |            |                 |                  | x — |                 | x  |                 |
| aLiFE                               |                 |                 |                |            |                 |                  | x — |                 | x  |                 |
| Control Group                       |                 |                 |                |            |                 | x —              |     |                 | x  |                 |

\* Outcome measures collected during the assessments are listed in Table 3.

§ Home visit (HV) 1 was completed 8-15 days after the baseline assessment.

PA monitoring / PA<sub>1</sub>, PA<sub>2</sub>, PA<sub>3</sub> participants physical activity was monitored for 7 consecutive days. No contact to the research team was permitted during this time.

Table 5. Overview of intervention timeframe

| Time point     | eLiFE                                              | aLiFE               |
|----------------|----------------------------------------------------|---------------------|
| <b>Week 0</b>  | Extra home visit if no prior smartphone experience |                     |
| <b>Week 1</b>  | Home visit 1                                       | Home visit 1        |
| <b>Week 2</b>  | Home visit 2                                       | Home visit 2        |
| <b>Week 4</b>  | <i>Phone call 1</i>                                | Home visit 3        |
| <b>Week 5</b>  | Home visit 3                                       | <i>Phone call 1</i> |
| <b>Week 6</b>  |                                                    | Home visit 4        |
| <b>Week 9</b>  | Home visit 4                                       | Home visit 5        |
| <b>Week 11</b> |                                                    | <i>Phone call 2</i> |
| <b>Week 13</b> | <i>Phone call 2</i>                                | Home visit 6        |
| <b>Week 17</b> | <i>Phone call 3</i>                                | <i>Phone call 3</i> |

## Randomisation

Randomisation is undertaken following one week of activity monitoring at baseline, using a web-based randomisation procedure developed, used and run by the Unit for Applied Clinical Research at the Faculty of Medicine and Health Sciences at NTNU. Randomisation is stratified to centre and performed by block randomisation, where block sizes can vary. One person at each site, unblinded to group allocation, has access to the web-based randomisation platform and forwards the result to the instructors who provide the intervention. Recruitment continues until 60 participants have completed their first home visit per study site.

## Interventions

1  
2  
3  
4 Following the feedback from participants in a pilot study, the aLiFE activity framework is applied  
5 in both intervention arms. Details of the intervention components are shown in Table 6 (TiDiER  
6 Guidelines). In short, the programme consists of strategies a) to **improve balance** by use of four  
7 principles (“decreasing base of support”, “shifting your weight to the limits of stability”, “stepping  
8 over objects”, and “stepping, hopping and jumping in different ways”); b) to **increase muscle**  
9 **strength** by use of seven principles (“bend your knees”, “sit to stand”, “on your toes”, “on your  
10 heels”, “up the stairs”, “move sideways” and “tighten muscles”); and c) to **reduce sedentariness**  
11 **and increase physical activity** by teaching the participants two principles (“sit less” and “walk  
12 more”). In addition, the programme comprises a behavioural change model for developing  
13 intentions to become more physically active and turning these intentions into actions by embedding  
14 activities into daily life to make them habitual. As the participants learn the programme, they can  
15 find opportunities, choose other activities, and upgrade their existing activities (Table 6).  
16  
17  
18  
19  
20  
21  
22  
23

24 The activities are individually tailored to each participant’s functional status at the first home visit  
25 by use of an initial balance and strength assessment (the **LiFE assessment tool, LAT**),(17)  
26 defining the starting level for the balance and strength activities.  
27  
28  
29

30 Both eLiFE and aLiFE participants receive home visits during which instructors teach and deliver  
31 the life-style integrated exercise programme. Three follow-up / booster phone calls are also  
32 provided during the 6 month active intervention period (Table 6). eLiFE participants receive  
33 instructions by use of video clips, pictures and text/verbal instructions in the PreventIT application  
34 on a smartphone for each activity and aLiFE participants use a paper-based manual with  
35 descriptions and instructions for the same activities. eLiFE participants receive android phones  
36 that they use during the intervention and follow-up period. Participants without any smartphone  
37 experience receive one extra home visit with information on how to use a smartphone prior to  
38 starting the home visits in week 1. eLiFE participants also receive technological support to  
39 navigate through the application. The architecture of the eLiFE application system is shown in  
40 Figure 1. The active intervention is scheduled for 6 months in order to be able to change  
41 behaviour.(52, 53) Participants are encouraged to continue independently to use smartphones and  
42 smartwatches (eLiFE) or their paper materials (aLiFE) during the passive follow-up period  
43 (between months 7 and 12).  
44  
45  
46  
47  
48  
49  
50  
51  
52  
53  
54  
55  
56  
57  
58  
59  
60

Table 6. Intervention description using the Template for Intervention Description and Replication (TIDieR) checklist.

|                   |                     |                                                                                                                                                                                                                                                                                                                                                                                                                                                                                                                                                                                                                                                                                                                                                                                          |                                                                                                                                                                                                                                                                                                                                                                                                                                                                                                                                         |                                                                                        |
|-------------------|---------------------|------------------------------------------------------------------------------------------------------------------------------------------------------------------------------------------------------------------------------------------------------------------------------------------------------------------------------------------------------------------------------------------------------------------------------------------------------------------------------------------------------------------------------------------------------------------------------------------------------------------------------------------------------------------------------------------------------------------------------------------------------------------------------------------|-----------------------------------------------------------------------------------------------------------------------------------------------------------------------------------------------------------------------------------------------------------------------------------------------------------------------------------------------------------------------------------------------------------------------------------------------------------------------------------------------------------------------------------------|----------------------------------------------------------------------------------------|
| 1. Brief name     | Study name          | PreventIT<br><br>(Early risk detection and prevention in ageing people by self-administered ICT-supported assessment and a behavioural change intervention, delivered by use of smartphones and smartwatches)                                                                                                                                                                                                                                                                                                                                                                                                                                                                                                                                                                            |                                                                                                                                                                                                                                                                                                                                                                                                                                                                                                                                         |                                                                                        |
|                   | Intervention groups | The <b>aLiFE</b> programme<br><br><b>(experimental group 1)</b>                                                                                                                                                                                                                                                                                                                                                                                                                                                                                                                                                                                                                                                                                                                          | The <b>eLiFE</b> programme<br><br><b>(experimental group 2)</b>                                                                                                                                                                                                                                                                                                                                                                                                                                                                         | WHO guidelines<br><br><b>(control group)</b>                                           |
| 2. Why            |                     | A rapidly aging population will place increasing stress on our health care systems. The focus needs to shift from treatment towards health promotion for active and healthy ageing and prevention of age-related diseases. The PreventIT project has adapted a lifestyle-integrated exercise programme (LiFE) to suit healthy young older adults at risk for future accelerated functional decline into two interventions: One delivered by instructors and use of paper manuals (aLiFE), and one delivered via mobile phone (smartphone) with a virtual instructor (eLiFE). The aim is to develop and test a personalised behaviour change intervention on physical activity aimed at young older adults that has the potential to prevent accelerated functional decline at older age. |                                                                                                                                                                                                                                                                                                                                                                                                                                                                                                                                         |                                                                                        |
| 3. What materials |                     | All participants received a detailed risk and baseline assessment at their respective study sites, assessing medical history, physical and cognitive function and quality of life. All participants had their PA levels recorded for 7 consecutive day using activity monitors. In all three groups, participants completed motivational questionnaires prior to beginning the intervention.                                                                                                                                                                                                                                                                                                                                                                                             |                                                                                                                                                                                                                                                                                                                                                                                                                                                                                                                                         |                                                                                        |
|                   |                     | <b>Paper manual -</b><br><br>The aLiFE manual included descriptions and instructions of the activities selectable within the programme (strength and balance exercises), an activity planner (weekly use) and activity counter (daily use), safety instructions and further information about increasing physical activity and reducing sedentariness.                                                                                                                                                                                                                                                                                                                                                                                                                                   | <b>PreventIT mHealth system on smartphone and smartwatch -</b><br>eLiFE was delivered via the PreventIT mHealth system. Participants received instructions by use of video clips, pictures and text/verbal instructions on the PreventIT smartphone for the activities. The architecture of the eLiFE application system is shown in Figure 1. Activity planning, reporting and feedback is provided entirely through the smartphone application. Participants receive one trouble-shooting document to aid with technological problems | One page WHO guidelines regarding recommended PA levels per week for the target group. |



|                   |                                      |                                                                                                                                                                                                                                                                                                                                                                                                                                          |                                                                                                                                                                                                                                                 |  |
|-------------------|--------------------------------------|------------------------------------------------------------------------------------------------------------------------------------------------------------------------------------------------------------------------------------------------------------------------------------------------------------------------------------------------------------------------------------------------------------------------------------------|-------------------------------------------------------------------------------------------------------------------------------------------------------------------------------------------------------------------------------------------------|--|
|                   |                                      |                                                                                                                                                                                                                                                                                                                                                                                                                                          | they may encounter. Instructors are available to help participants use the smartphone during home visits.                                                                                                                                       |  |
| 4. What procedure |                                      | All participants receive a risk screening and medical assessment, to ensure study eligibility and rule out contra-indications to an exercise intervention. A detailed baseline assessment at a clinical site and a 7-day PA monitoring is completed. Participants are informed of their group allocation after their 7-days of PA monitoring is completed.                                                                               |                                                                                                                                                                                                                                                 |  |
|                   |                                      | Intervention groups                                                                                                                                                                                                                                                                                                                                                                                                                      | Control group                                                                                                                                                                                                                                   |  |
|                   |                                      | Receive direct support through a trained staff member to implement the a/eLiFE programme into their daily life and understand the concept of the programme. Assistance is provided on how to select, upgrade and identify additional daily situations to integrate activities. Participants receive home visits as well as support phone calls during the 6-month active intervention period as part of the ongoing active intervention. | During a single home visit the written WHO guidelines are provided to participants with guidance on the dose-response relationship between the frequency, duration, intensity, type and total amount of physical activity recommended per week. |  |
| 5. Who provided   | Assessment                           | All assessments completed at the clinical sites are completed by blinded research staff with tertiary qualification as physiotherapists or exercise scientists. Assessments are completed at baseline (T1), 6 months post-randomisation (T2) and 12 months post-randomisation (T3).                                                                                                                                                      |                                                                                                                                                                                                                                                 |  |
|                   | Intervention                         | Following randomisation, participants receive the relevant intervention delivered in their home, provided by physiotherapists or exercise scientists. All staff had undergone a 3-day workshop to ensure standardised intervention delivery across all three clinical sites.                                                                                                                                                             |                                                                                                                                                                                                                                                 |  |
| 6. How            | Invitation to participate            | Persons born between 1947 and 1956 (61-70 years of age at the time of inclusion) were invited via mail-out to participate. Three respective local registries randomly selected persons within the target group. Participants were required to contact their respective site actively if they were interested.                                                                                                                            |                                                                                                                                                                                                                                                 |  |
|                   | Telephone screening                  | A telephone screening determined eligibility to attend the risk screening of potential participants.                                                                                                                                                                                                                                                                                                                                     |                                                                                                                                                                                                                                                 |  |
|                   | Risk screening and medical screening | The risk screening is completed by trained researchers and a medical screening is completed by medical doctors at each site. The multistep process ensures participants meet                                                                                                                                                                                                                                                             |                                                                                                                                                                                                                                                 |  |

|                      |                            |                                                                                                                                                                                                                                                                                                                                                                                                                                                                                                                                                                                             |                                                                                                                                                                                                                                                                                                                                                                                                                                                     |                                       |
|----------------------|----------------------------|---------------------------------------------------------------------------------------------------------------------------------------------------------------------------------------------------------------------------------------------------------------------------------------------------------------------------------------------------------------------------------------------------------------------------------------------------------------------------------------------------------------------------------------------------------------------------------------------|-----------------------------------------------------------------------------------------------------------------------------------------------------------------------------------------------------------------------------------------------------------------------------------------------------------------------------------------------------------------------------------------------------------------------------------------------------|---------------------------------------|
|                      |                            | in/exclusion criteria, and that an exercise programme is deemed safe from a medical perspective.                                                                                                                                                                                                                                                                                                                                                                                                                                                                                            |                                                                                                                                                                                                                                                                                                                                                                                                                                                     |                                       |
|                      | T1, T2, T3 assessment      | The assessments are completed by blinded research staff at the three clinical sites.                                                                                                                                                                                                                                                                                                                                                                                                                                                                                                        |                                                                                                                                                                                                                                                                                                                                                                                                                                                     |                                       |
|                      |                            | The interventions (aLiFE and eLiFE) are delivered in the participants' home, the types of activities and difficulty levels are dependent on the individual's ability and preference. Home visits and follow-up phone calls are completed according to a predefined schedule. Participants are permitted to attend further exercises groups, undertake other activities or seek further health care during the duration of the trial which are beyond the scope of the RCT. Details are recorded during assessments (T2, T3) but no additional assistance is provided by the research staff. | The control group receives a single home visit and is provided with written information about PA recommendations only.<br><br>Participants are permitted to attend exercises groups, undertake other activities or seek health care during the duration of the trial which are beyond the scope of the control group intervention. Details are recorded during assessments (T2, T3) but no additional assistance is provided by the research staff. |                                       |
| 7. Where             |                            | The RCT is conducted as part of the PreventIT project (Early risk detection and prevention in ageing people by self-administered ICT-supported assessment and a behavioural change intervention, delivered by use of smartphones and smartwatches), a European Horizon2020 ICT and personal health project (project number 689238). The three participating clinical centres are Trondheim, Norway, Amsterdam, The Netherlands and Stuttgart, Germany.                                                                                                                                      |                                                                                                                                                                                                                                                                                                                                                                                                                                                     |                                       |
| 8. When and how much |                            | <b>The aLiFE programme (experimental group 1)</b>                                                                                                                                                                                                                                                                                                                                                                                                                                                                                                                                           | <b>The eLiFE programme (experimental group 2)</b>                                                                                                                                                                                                                                                                                                                                                                                                   | <b>WHO guidelines (control group)</b> |
|                      | Home visits, Phone calls   | 6 home visits<br>3 phone calls                                                                                                                                                                                                                                                                                                                                                                                                                                                                                                                                                              | 4 home visits<br>3 phone calls                                                                                                                                                                                                                                                                                                                                                                                                                      | 1 home visit                          |
|                      | Active Intervention period | 6 months                                                                                                                                                                                                                                                                                                                                                                                                                                                                                                                                                                                    | 6 months                                                                                                                                                                                                                                                                                                                                                                                                                                            | n/a                                   |
|                      | Passive follow-up period   | 6 months                                                                                                                                                                                                                                                                                                                                                                                                                                                                                                                                                                                    | 6 months                                                                                                                                                                                                                                                                                                                                                                                                                                            | 12 months                             |
|                      | Instructor main role       | Teach the programme                                                                                                                                                                                                                                                                                                                                                                                                                                                                                                                                                                         | Teach how to use the PreventIT mHealth system                                                                                                                                                                                                                                                                                                                                                                                                       | n/a                                   |
|                      | Activities                 | Participants choose activities from the strength, balance and/or PA domain to integrate                                                                                                                                                                                                                                                                                                                                                                                                                                                                                                     | The PreventIT mHealth system suggests a list of activities to participants ranked according to                                                                                                                                                                                                                                                                                                                                                      | n/a                                   |

|              |                             |                                                                                                                                             |                                                                                                                                                                                                                                         |     |
|--------------|-----------------------------|---------------------------------------------------------------------------------------------------------------------------------------------|-----------------------------------------------------------------------------------------------------------------------------------------------------------------------------------------------------------------------------------------|-----|
|              |                             | into their daily activities. The number of activities is individual and an activity planner and counter is used for documentation purposes. | the expected level of benefit. Participants select their preferred activities from this list. The number of activities chosen is determined by the individual.                                                                          |     |
|              | Training goals              | Decided by the participants with help of a pre-specified list of possible goals                                                             | Participants select goals from a pre-specified list within the application                                                                                                                                                              | n/a |
|              | Phenotyping tool            | Not used in aLiFE                                                                                                                           | Results from assessments (T1) are included in the PreventIT mHealth system for each participant individually prior to the first home visit to decide what to prioritise among the activities (balance, strength, or physical activity). | n/a |
|              | Motivation                  | Provided by the instructor based individual progress (e.g. reviewing the activity planner during home visits)                               | Personalized motivational messages are displayed on the phone based on chosen activities and the reported adherence                                                                                                                     | n/a |
|              | Social interaction /Chat    | n/a                                                                                                                                         | Participants can use the platform "Slack" for group chat to communicate anonymously with other eLiFE participants at their clinical site.                                                                                               | n/a |
| 9. Tailoring | aLiFE assessment tool (LAT) | The LAT is performed at the first home visit so the instructor can set the initial difficulty level on the balance and strength activities  | The LAT is performed at the first home visit, instructors manually add the results to the PreventIT mHealth system, and the system sets the initial difficulty level on the balance and strength activities                             | n/a |
|              | Progression                 | The instructor teaches the participants when to upgrade the number of activities and situations during the subsequent home visits           | Participants can independently progress their activities based on the rule that the user has performed the activity each day for the last 7 days for at least 50% of the goal on average and                                            |     |

|                        |                             |                                                                                                                                                                                                                                                                                                                                                                                                                                                                                                                                                                                                                                                                                                                                                                                                                                                                                                                                                                                                                                              |                                                                                                                                                                                                                                                                                                                                                                    |     |
|------------------------|-----------------------------|----------------------------------------------------------------------------------------------------------------------------------------------------------------------------------------------------------------------------------------------------------------------------------------------------------------------------------------------------------------------------------------------------------------------------------------------------------------------------------------------------------------------------------------------------------------------------------------------------------------------------------------------------------------------------------------------------------------------------------------------------------------------------------------------------------------------------------------------------------------------------------------------------------------------------------------------------------------------------------------------------------------------------------------------|--------------------------------------------------------------------------------------------------------------------------------------------------------------------------------------------------------------------------------------------------------------------------------------------------------------------------------------------------------------------|-----|
|                        |                             |                                                                                                                                                                                                                                                                                                                                                                                                                                                                                                                                                                                                                                                                                                                                                                                                                                                                                                                                                                                                                                              | at least 50% of the goal on each of the last three days.<br><br>The progression is not compulsory when a higher level becomes accessible.                                                                                                                                                                                                                          |     |
|                        | Feedback                    | Feedback is provided by the instructor based on individual progress (reviewing the activity planner and counter) during home visits                                                                                                                                                                                                                                                                                                                                                                                                                                                                                                                                                                                                                                                                                                                                                                                                                                                                                                          | Participants receive feedback on their PreventIT mHealth system:<br><br>1. based on physical behaviour monitored by the smartphone and the smartwatch (time of PA and amount of sedentariness).<br><br>2. depending on the amount (type and dose) of strength and balance activities completed (in app adherence reporting) in relation to the intended type/dose. | n/a |
| 10. Modification       | Super-user                  | Participants are recommended to select activities that are challenging and relevant to the individual as identified using the LAT. As some participants reached Level 4 (highest level) on certain activities (mainly strength exercises), further 'upgrades' to the activities were offered. This 'super user' concept aims to further increase the task challenge (beyond Level 4) in order to ensure a training intensity which induces motor adaptations and clinically relevant improvements in functional performances. It includes elements of peak strain, slow motion (extended muscle loading), increased number of repetitions, differential training (learning through change/differences in movement variables e.g. joint angle/position), combining strength and balance activities, decreasing base of support, and more complex sensorimotor tasks.<br><br>Participants are able to access the 'super-user' function for a specific activity after having performed the particular activity at 100% for 14 consecutive days. |                                                                                                                                                                                                                                                                                                                                                                    | n/a |
| 11. How well - planned | Participant Daily Adherence | Daily adherence can be reported using the activity counters, with responses being dichotomous (completed, not completed)                                                                                                                                                                                                                                                                                                                                                                                                                                                                                                                                                                                                                                                                                                                                                                                                                                                                                                                     | Daily adherence is reported on the PreventIT mHealth system that specifically asks about the planned/intended activities as previously defined by the participant.                                                                                                                                                                                                 | n/a |

|  |                                     |                                                                                                                                                                                                                                                                                                                                                                                            |
|--|-------------------------------------|--------------------------------------------------------------------------------------------------------------------------------------------------------------------------------------------------------------------------------------------------------------------------------------------------------------------------------------------------------------------------------------------|
|  | Participant<br>Monthly<br>adherence | Monthly adherence data is obtained via a web-link or via a postal question. Participants are asked if they completed all their activities/PA as intended in the last 7 days. The responses are: 1) yes, more than intended; 2) yes, as much as intended; 3) yes, but not as much as intended; 4) no, did not feel well; 5) no, forgot; 6) no, no time; 7) no, dislike of planned activity. |
|  | Instructor<br>fidelity              | Training is delivered independently in each of the three clinical sites. All instructors adhere to a single training protocol to ensure standardised delivery of the programme across sites. Training delivery was taught during a 3-day workshop with subsequent exam.                                                                                                                    |

n/a=not applicable, this intervention component is not available in this intervention arm/ control group; T1=Baseline assessment; T2=Assessment 6 months post-randomisation  $\pm$  2 weeks; T3=Assessment 12 months post-randomisation  $\pm$  4 weeks.

### **eLiFE/aLiFE instructors**

The instructors follow an eLiFE and aLiFE instructor manual with topics to teach during each home visit/phone call. To ensure all clinical sites deliver the programme in a standardised manner, instructors attended a three-day workshop covering the **eLiFE and aLiFE concept**. aLiFE components including aims, activity principles, behavioural change concept, instructing and supporting the participants in action planning using the activity planner and activity counter, upgrading activities during subsequent home visits and phone calls, and safety principles were taught. The eLiFE concept included the same content as aLiFE and additionally, knowledge about the PreventIT mHealth system and how to instruct the participants to use the technology was included in the workshop. All instructors were tested and awarded certification prior to the start of the study, to ensure that they had the competences needed to deliver both the eLiFE and the aLiFE interventions.

### **Control group**

The control group receives one home visit to provide them with a two-page written summary of the WHO recommendations of physical activity.<sup>(54)</sup> These guidelines are relevant to all healthy older adults unless specific medical conditions indicate the contrary, and highlight the benefits of being physically active as well as stimulate the recommended amount of physical activity to be undertaken per week.

### **Focus groups**

1  
2  
3  
4  
5  
6  
7  
8  
9  
10  
11  
12  
13  
14  
15  
16  
17  
Semi-structured focus group interviews are conducted with a maximum of 10 participants from each intervention arms and control group at each site, after the post-test (T2) assessment. The topics to be discussed include: a) the recruitment process; b) the randomisation process; c) screening and assessments; d) home visits; e) the instructors; f) the tools used (paper-based and technology enabled); g) support in the intervention period; h) the activities undertaken; i) experience of the follow-up period; j) ideas for improvement. In addition, the eLiFE participants are asked to keep an “Issues log” to record issues and difficulties with the technology and on the trial procedure.

18  
19  
20  
21  
22  
23  
24  
25  
26  
27  
28  
At the end of the trial, interviews with the assessors and the instructors will be performed. Interviews will be performed face-to-face, using a semi-structured interview guide. Topics to be discussed include: a) the recruitment process; b) the training received; c) successes and challenges in delivering the intervention; d) ideas for improvement. Focus groups and interviews are expected to last between 90-120 minutes. All focus groups and interviews are recorded using a digital voice recorder, transcribed, and translated into English prior to data analysis.

### 29 30 **Participant retention, adherence and dropout**

31  
32  
33  
34  
35  
36  
37  
38  
39  
40  
41  
42  
43  
44  
Participants’ progression through the study phases is documented and presented in a CONSORT (55) flow diagram. Reasons for dropout from the entire trial, or the intervention programme only, are recorded. In consenting to the trial, participants are consenting to the trial treatment, follow-up and data collection. If withdrawal from the randomly allocated treatment occurs, participants are still followed up if they consent. Participants are allowed to withdraw without giving a reason at any time and a withdrawal CRF is completed to document the date and reason (if known) for withdrawal. Data collected up to the time of withdrawal will be included in analyses unless the patient specifically asks for it to be withdrawn.

45  
46  
47  
48  
49  
50  
51  
52  
53  
In all three study arms adherence to the intervention is measured monthly by use of a single question answerable via email or postcard (see details in Table 6). The intervention arms also report their exercise adherence on a daily basis through in-app reporting (eLiFE) or paper documentation (aLiFE: activity counter). Adherence measures are part of the study procedure as well as an outcome measure in this trial.

### 54 55 **Safety considerations and adverse events**

1  
2  
3  
4 Based on existing literature, the risk of adverse events during the eLiFE and aLiFE training is  
5 estimated to be low.(17, 18) The safety aspect is emphasised in the eLiFE and aLiFE programmes,  
6 including the participants' manuals and smartphone app. Exercise training can have side effects  
7 and thus some adverse reactions such as muscle pain or adverse events like falls due to being more  
8 physically active in everyday life are expected. Several strategies have been incorporated in this  
9 trial to minimise the risk for study participants.  
10  
11  
12  
13

14 The number and description of adverse events that occur during the intervention and follow-up  
15 period that could be attributable to participation in the eLiFE or aLiFE programmes are recorded.  
16 Participants are encouraged to report any adverse events and the medical responsible person at  
17 each site evaluates the need for further medical care. In case of any serious adverse event,  
18 participants are encouraged to seek appropriate medical advice/help. All adverse events are  
19 reported to the PreventIT Independent Data Monitoring Committee (IDMC) and will be reported  
20 in all publications arising from this project.  
21  
22  
23  
24  
25

### 26 **Planned data analyses**

27  
28  
29 A complete data analysis plan was finalised on October 3<sup>rd</sup> 2017 before the T2 assessments (at 6  
30 months) started (accessible via first author).  
31  
32

33  
34 The first analyses will be performed blinded to group allocation. It will be evaluated whether there  
35 is a pattern of missing data, and sensitivity analyses will be performed when missing data, collected  
36 via an assessor or using the smartphone, are judged not missing at random. Data at baseline will  
37 be analysed using descriptive statistics. The primary clinical outcome measures will evaluate the  
38 change in function from baseline (T1) to follow-up (T3), for the eLiFE and the aLiFE interventions  
39 compared to the control group. Linear mixed-models will be used which will include factors for  
40 time point and study allocation, as well as their interaction, as independent variables. Within-  
41 subject baseline risk will be accounted for by including a subject-specific random intercept. Due  
42 to a limited number of centres (three), the centre effect will be treated as fixed rather than random,  
43 and included among the independent variables. Estimates of effect sizes for the differences  
44 between eLiFE, aLiFE and control groups, and for changes within the eLiFE and aLiFE groups,  
45 will be provided as mean differences for the outcome variables. In case of non-normality, other  
46 appropriate models will be used. Results will be used to perform calculations of sample sizes to  
47  
48  
49  
50  
51  
52  
53  
54  
55  
56  
57  
58  
59  
60

1  
2  
3 determine the optimal number of participants to be included when planning for a future final RCT  
4 to detect a real effect as statistically significant.  
5  
6

7 The analysis of change will be based on intention-to-treat, but a per protocol analysis will also be  
8 conducted as a sensitivity analysis as this is likely to provide further insight into the feasibility of  
9 the interventions.  
10  
11

12  
13 In order to determine a potential dose-response association between the adherence and outcome,  
14 the association between the two primary clinical outcomes, measured by LLFDI and activity  
15 monitoring (complexity metric), and the adherence measures collected (single question every four  
16 weeks to all participants in all three groups) will be assessed. Further subgroup analysis dependent  
17 on group allocation or adherence are described in detail in the analysis plan.  
18  
19

20  
21  
22 Multimodal analyses will be performed to calculate behavioural complexity using appropriate  
23 metrics such as Lempel-Ziv complexity (LZC). LZC determines the number of distinct temporal  
24 sequences of *multivariate physical activity states*, as well as the rate of their recurrence, with larger  
25 values indicating higher complexity of the given activity pattern.<sup>(20)</sup> Data collected from the  
26 seven-day activity monitoring will be processed offline making use of software developed in the  
27 FARSEEING project (<http://farseeingresearch.eu>).<sup>(43)</sup> A set of sensor-based physical activity  
28 features will be extracted from the signals, including the percentages of sedentary, active, and  
29 walking times, duration and intensity (metabolic equivalent) of the activities, and gait and turning  
30 characteristics. Combinations of these features will be used to define the multivariate states.<sup>(20)</sup>  
31  
32

33  
34 A further focus of the analyses will be on the willingness to participate, adherence to the  
35 interventions, and acceptance of the interventions, including the technology used to deliver the  
36 intervention and give feedback and motivation for behavioural change.  
37  
38

39  
40 Another focus will be to analyse the data collected by the technology to establish their reliability,  
41 to analyse participants' perception of which activities they have completed compared to what  
42 sensors have recorded as well as exploring additional metrics.  
43  
44

45  
46 The health economics analysis will focus on the feasibility of collecting data on, and estimate,  
47 health care resource utilisation, costs and quality adjusted life years (QALYs), and model  
48 incremental cost-effectiveness ratios (ICERs) of eLiFE and aLiFE compared with the control  
49 group over a 6- and 12-month period in a standard within-trial evaluation model. EQ-5D-5L health  
50  
51  
52  
53  
54  
55  
56  
57  
58  
59  
60



1  
2  
3 utility scores will be used to calculate QALYs for economic evaluation. Published national unit  
4 costs will be used to calculate the total costs of resource utilisation.  
5  
6

7 This feasibility RCT is a hypothesis-generating study, where additional explorative analyses not  
8 described in this protocol paper or data analysis plan might be planned and performed.  
9  
10

### 11 **Data storing and security**

12  
13 Data are collected by the research staff, and from smartphones and smartwatches used by eLiFE  
14 participants. Data are stored in three different locations: in a web-based case report system  
15 (WebCRF), developed by NTNU, in the memories of the individual smartphones, and in an in-  
16 house protected server at NTNU. "Data are synched daily from the smartphones onto the servers.  
17 Moreover Data on the servers are backed up daily as part of the routine scheduled backup of the  
18 NTNU computer center that hosts the PreventIt servers. Participants' ID and identifiable  
19 information are kept locally and securely by recruiters at each site at all times. Data in the WebCRF  
20 and in the NTNU servers are pseudonymised. Only research staff directly involved in the analysis  
21 of the RCT will have access to the final trial dataset, which will only contain non-identifiable  
22 information.  
23  
24  
25  
26  
27  
28  
29  
30

31 The in-house web-server will be in a demilitarised zone (DMZ) and behind a firewall. Both the  
32 WebCRF and the data-servers will be behind a second firewall. Security and other ethical issues  
33 are priority, as sensor systems that monitor and report on health-related behaviours depend on the  
34 processing of personal data. All the data on the server are maintained in encrypted databases.  
35  
36  
37

38 All data on smartphones are kept in encrypted databases. All transmission of data between the  
39 server and the smartphones is encrypted. Each phone/user is provided with an individual user  
40 login.  
41  
42  
43

44 After the conclusion of the feasibility RCT, data will remain stored on the NTNU server in  
45 pseudonymised format using participant IDs. Coupling to personal IDs will be stored securely for  
46 five years after the end of the PreventIT project at each of the three sites. After this, data will be  
47 fully anonymised.  
48  
49  
50

### 51 **Participant and public involvement**

52  
53 Prior to commencing this feasibility RCT, pilot studies were conducted for both the eLiFE and the  
54 aLiFE intervention mode. These pilot studies provided information about the practical execution  
55  
56  
57  
58  
59  
60

1  
2  
3  
4 of collecting the relevant outcome measures, and to improve the interventions components, with a  
5 focus on the feasibility and acceptability of the balance, strength and PA activities. The eLiFE  
6 intervention was further tested for usability and acceptability within the target group. Focus groups  
7 were conducted during the pilot studies, providing insight into participants' priorities, experience  
8 and preferences. There are no participant advisers in the study, as the aim is to conduct a feasibility  
9 RCT and not a final RCT.  
10  
11  
12  
13

14 Following the participants final assessment (T3) all participants will get individual, written results  
15 from their participation providing them with an overview of the study status and their personal  
16 results regarding physical outcome measures and the 7-day consecutive PA monitoring.  
17  
18  
19

## 20 **RESULTS**

21  
22  
23 In total 7500 persons between 61 and 70 years of age were drawn from the local registries in  
24 Norway, Germany, and the Netherlands. 2000 letters in Trondheim, 1500 letters in Stuttgart, and  
25 4000 letters in Amsterdam were sent. Following the three step screening process, 180 participants  
26 were successfully enrolled into the study, accepted randomisation and completed their first home  
27 visit. The flow of participants from recruitment until randomisation is shown in Figure 2.  
28  
29  
30  
31

## 32 **DISCUSSION**

33  
34  
35 The current study is designed to evaluate the feasibility of conducting a randomised controlled  
36 trial of a life-style integrated intervention delivered in two modes, aLiFE (an instructor-delivered,  
37 paper-based intervention) and eLiFE (a newly developed intervention using a mobile health  
38 application system) compared to simply being given guidelines on physical activity requirements.  
39 Both interventions entail embedding activities into daily life, strengthened by a behavioural change  
40 model aimed at making the activities habitual. This study further develops and adapts the LiFE  
41 programme to suit a younger population of seniors, at retirement age (61-70 years). Particularly at  
42 time of retirement, LiFE-based interventions may be beneficial to young older adults by  
43 specifically completing lower extremity muscle strengthening and balance activities as well as  
44 increasing physical activity to avoid later age-related functional decline. In comparison to  
45 traditional exercise programmes, such as group training and gym workouts where one needs to set  
46 aside dedicated time to follow the programme, LiFE-based programmes embed small bouts of  
47 activities into the individual's routines that are already part of their daily life. This individual  
48  
49  
50  
51  
52  
53  
54  
55  
56  
57  
58  
59  
60

1  
2  
3 tailoring of exercises, and embedding them into daily routines, seems to be a promising approach  
4 to keep young older adults active.(56)  
5  
6

7 Capitalising on the benefits of technological advances and embedding the concept into a mobile  
8 health application system, aLiFE was transferred to an ICT-platform to create eLiFE using  
9 smartphones and smartwatches, commonly available technology already in use in this target  
10 population. There is a rapid development in mobile health application technology, with numerous  
11 health applications currently available. Application systems may motivate persons to be more  
12 physically active, provide opportunities to personalise interventions, provide feedback to the  
13 person using the technology, and help people keep track of their physical activities. Despite this  
14 potential, there is at present a lack of systems developed based on existing knowledge from  
15 research on exercise programmes and behavioural change, and tailored for use in young older  
16 (61-70 years) adults. The current trial will provide data on feasibility and usability of both the mobile  
17 health application in eLiFE and the instructor-delivered aLiFE. The aim is that the interventions  
18 can empower this population to maintain or increase their activity levels, so that they can stay  
19 active and healthy longer at advancing age. The study will provide more knowledge about how to  
20 integrate demanding activities into daily life and how to deliver an intervention to young older  
21 adults in order to increase their daily physical activity.  
22  
23  
24  
25  
26  
27  
28  
29  
30  
31  
32

33 Finally, it is challenging to recruit a target population of young older adults without current signs  
34 of functional decline. Understanding how to recruit this specific population will aid in providing  
35 recommendations for a future RCT.  
36  
37  
38

### 39 **Conclusions**

40  
41 It is expected that both eLiFE and aLiFE have the potential to provide effective means to increase  
42 physical activity and complexity, improve functional capacity and change behaviour in young  
43 older adults. By using technology in eLiFE, it is expected that the behavioural change aspects of  
44 the aLiFE intervention are strengthened. It is also expected that an intervention that embeds more  
45 activity into daily life has the potential to empower young older adults to stay active at older age  
46 and therefore has the potential to reduce the risk of future functional decline.  
47  
48  
49  
50  
51

### 52 **Ethics and dissemination**

53  
54  
55  
56  
57  
58  
59  
60

1  
2  
3  
4 The study and methods were evaluated and approved by the ethical committees in Norway (REK  
5 midt, 2016/1891), Stuttgart (registration number 770/2016BO1), and Amsterdam (METc VUmc  
6 registration number 2016.539 (NL59977.029.16)). The study has approvals to send invitation  
7 letters based on data from local/national registries.  
8  
9

10  
11 We will seek to publish all results from the feasibility trial in open access, peer-reviewed  
12 international journals, and disseminated at scientific and non-scientific conferences and events.  
13  
14 Main results will also be shared on the project website and spread to various stakeholders.  
15  
16 Authorship eligibility will follow ICMJE (International Committee of Medical Journal Editors)  
17 ([http://www.icmje.org/recommendations/browse/roles-and-responsibilities/defining-the-role-of-](http://www.icmje.org/recommendations/browse/roles-and-responsibilities/defining-the-role-of-authors-and-contributors.html)  
18 [authors-and-contributors.html](http://www.icmje.org/recommendations/browse/roles-and-responsibilities/defining-the-role-of-authors-and-contributors.html)).  
19  
20

### 21 **Trial status**

22  
23  
24 The trial commenced recruitment in March 2017. In August 2017, 180 participants were included  
25 in the trial.  
26  
27  
28  
29  
30  
31  
32  
33  
34  
35  
36  
37  
38  
39  
40  
41  
42  
43  
44  
45  
46  
47  
48  
49  
50  
51  
52  
53  
54  
55  
56  
57  
58  
59  
60

## Acknowledgements

We thank the ongoing support of participants, research staff, coordinators, data managers and other site staff who have been responsible for setting up the trial, recruiting participants, and collecting data.

**Declaration of interests:** There are no competing interests.

**Funding statement:** The feasibility RCT is part of the EU funded project “PreventIT” (2016-2018, grant number 689238) responding to the Horizon 2020, Personalised Health and Care call PHC-21: Advancing active and healthy aging with ICT: Early risk detection and intervention. The PreventIT project focuses on a new behaviour change activity approach for young older adults (61-70 years of age) with an overall aim to shift focus from treatment of conditions and diseases to early prevention and to empower people to take care of their own health.

The EU was not actively responsible or involved in the study design, collection, management, analysis or interpretation of data. The writing of reports and the decision to submit for publication is not authorised by the EU.

**Data sharing statement:** The PreventIT consortium intends to make data available for data sharing after the data collection has been completed and the primary papers are published.

**Authors’ contributions:** All authors made substantial contribution to the concept and design of the study. KT drafted the manuscript, with input from BV and JLH. EB, DPF, CT, and HHH provided input on behavioural change. SM, AZ, KA, and API provided technical input on the eLiFE description. FY and BG provided input on health economics. CB, MS, and LC provided input on the background information about the project. ABM, JVA, NJ, and MP provided input on the medical assessment and screening of participants. SB, RB, BV, JLH, and LC commented on the entire manuscript. KT, ASM, BV, and JLH critically revised the manuscript with input from all co-authors. All authors approved the final version of the document.

## References

- 1 Health at a Glance 2013:OECD Indicators. Available online: <http://www.oecd.org/els/health-systems/Health-at-a-Glance-2013.pdf> (Accessed Jan 2016).
- 2 Chatterji S, Byles J, Cutler D, et al. Health, functioning, and disability in older adults--present status and future implications. *Lancet* 2015;385(9967):563-75.
- 3 Rechel B, Doyle Y, Grundy E, et al. How can health systems respond to population ageing? Policy Briefing 10 WHO Regional Office for Europe 2009 [http://www.euro.who.int/\\_data/assets/pdf\\_file/0004/64966/E92560.pdf](http://www.euro.who.int/_data/assets/pdf_file/0004/64966/E92560.pdf) (Accessed Jan 2016).
- 4 American College of Sports Medicine, Chodzko-Zajko WJ, Proctor DN, et al. American College of Sports Medicine position stand. Exercise and physical activity for older adults. *Med Sci Sports Exerc* 2009;41(7):1510-30.
- 5 Dawe RJ, Leurgans SE, Yang J, et al. Association between Quantitative Gait and Balance Measures and Total Daily Physical Activity in Community-Dwelling Older Adults. *J Gerontol A Biol Sci Med Sci* 2018;73(5):636-642.
- 6 WorldHealthOrganization. Global recommendations on physical activity for health. 2011.
- 7 Olesen K, Rod NH, Madsen IE, et al. Does retirement reduce the risk of mental disorders? A national registry-linkage study of treatment for mental disorders before and after retirement of 245,082 Danish residents. *Occup Environ Med* 2015;72(5):366-72.
- 8 Landi F, Calvani R, Tosato M, et al. Age-Related Variations of Muscle Mass, Strength, and Physical Performance in Community-Dwellers: Results From the Milan EXPO Survey. *J Am Med Dir Assoc* 2017;18(1):88 e17-88 e24.
- 9 Hawley-Hague H, Horne M, Campbell M, et al. Multiple levels of influence on older adults' attendance and adherence to community exercise classes. *Gerontologist* 2014;54(4):599-610.
- 10 Nyman SR, Victor CR. Older people's recruitment, sustained participation, and adherence to falls prevention interventions in institutional settings: a supplement to the Cochrane systematic review. *Age Ageing* 2011;40(4):430-6.
- 11 Mikolaizak AS, Lord SR, Tiedemann A, et al. Adherence to a multifactorial fall prevention program following paramedic care: Predictors and impact on falls and health service use. Results from an RCT a priori subgroup analysis. *Australas J Ageing* 2018 Mar;37(1):54-61.
- 12 French DP, Olander EK, Chisholm A, et al. Which behaviour change techniques are most effective at increasing older adults' self-efficacy and physical activity behaviour? A systematic review. *Ann Behav Med* 2014;48(2):225-34.
- 13 Murray JM, Brennan SF, French DP, et al. Effectiveness of physical activity interventions in achieving behaviour change maintenance in young and middle aged adults: A systematic review and meta-analysis. *Soc Sci Med* 2017;192:125-33.
- 14 Strigglebout M, Hopman-Rock M, Crone M, et al. Predicting older adults' maintenance in exercise participation using an integrated social psychological model. *Health Education Research* 2006;21(1):1-14.
- 15 Devereux-Fitzgerald A, Powell R, Dewhurst A, et al. The acceptability of physical activity interventions to older adults: A systematic review and meta-synthesis. *Soc Sci Med* 2016;158:14-23.
- 16 Jonkman NH, Del Panta V, Hoekstra T, et al. Predicting Trajectories of Functional Decline in 60- to 70-Year-Old People. *Gerontology*. 2018;64(3):212-221.
- 17 Clemson L, Singh MF, Bundy A, et al. LiFE Pilot Study: A randomised trial of balance and strength training embedded in daily life activity to reduce falls in older adults. *Aust Occup Ther J* 2010;57(1):42-50.
- 18 Clemson L, Fiatarone Singh MA, Bundy A, et al. Integration of balance and strength training into daily life activity to reduce rate of falls in older people (the LiFE study): randomised parallel trial. *BMJ*



2012;345:e4547.

19 Campbell M, Fitzpatrick R, Haines A, et al. Framework for design and evaluation of complex interventions to improve health. *BMJ* 2000;321(7262):694-6.

20 Paraschiv-Ionescu A, Perruchoud C, Buchser E, et al. Barcoding human physical activity to assess chronic pain conditions. *PLoS One* 2012;7(2).

21 Kraft KP, Steel KA, Macmillan F, et al. Why few older adults participate in complex motor skills: a qualitative study of older adults' perceptions of difficulty and challenge. *BMC Public Health* 2015;15:1186.

22 Clemson L, Munro J. Conceptual model of habit reforming to improve balance and prevent falls. In: Pachana NA, editor. *Encyclopaedia of Geropsychology*. 1. Singapore: Springer; 2016. p. 1-10.

23 Michie S, Richardson M, Johnston M, et al. The behavior change technique taxonomy (v1) of 93 hierarchically clustered techniques: building an international consensus for the reporting of behavior change interventions. *Ann Behav Med* 2013;46(1):81-95.

24 Helbostad JL, Vereijken B, Becker C, et al. Mobile Health Applications to Promote Active and Healthy Ageing. *Sensors (Basel)* 2017;17(3).

25 Stensvold D, Viken H, Rognmo O, et al. A randomised controlled study of the long-term effects of exercise training on mortality in elderly people: study protocol for the Generation 100 study. *BMJ open* 2015;5(2).

26 Arain M, Campbell MJ, Cooper CL, et al. What is a pilot or feasibility study? A review of current practice and editorial policy. *BMC Med Res Methodol* 2010;10:67.

27 Browne RH. On the use of a pilot sample for sample size determination. *Stat Med* 1995;14(17):1933-40.

28 Billingham SA, Whitehead AL, Julious SA. An audit of sample sizes for pilot and feasibility trials being undertaken in the United Kingdom registered in the United Kingdom Clinical Research Network database. *BMC Med Res Methodol* 2013;13:104.

29 Nasreddine ZS, Phillips NA, Bedirian V, et al. The Montreal Cognitive Assessment, MoCA: a brief screening tool for mild cognitive impairment. *J Am Geriatr Soc* 2005;53(4):695-9.

30 Jette AM, Haley SM, Coster WJ, et al. Late life function and disability instrument: I. Development and evaluation of the disability component. *J Gerontol A Biol Sci Med Sci* 2002;57(4):M209-16.

31 Haley SM, Jette AM, Coster WJ, et al. Late Life Function and Disability Instrument: II. Development and evaluation of the function component. *J Gerontol A Biol Sci Med Sci* 2002;57(4):M217-22.

32 Paraschiv-Ionescu A, Perruchoud C, Rutschmann B, et al. Quantifying dimensions of physical behavior in chronic pain conditions. *J Neuroeng Rehabil* 2016;13(1):85.

33 Podsiadlo D, Richardson S. The timed "Up & Go": a test of basic functional mobility for frail elderly persons. *J Am Geriatr Soc* 1991;39(2):142-8.

34 Mellone S, Tacconi C, Chiari L. Validity of a Smartphone-based instrumented Timed Up and Go. *Gait Posture* 2012;36(1):163-5.

35 Rikli R, Jones CJ. *Senior Fitness Test Manual*. Champaign: Human Kinetics; 2001.

36 Farrar JT, Young JP, Jr., LaMoreaux L, et al. Clinical importance of changes in chronic pain intensity measured on an 11-point numerical pain rating scale. *Pain* 2001;94(2):149-58.

37 Radloff LS. The CES-D scale: a self-report depression scale for research in the general population. *Applied Psychological Measurement* 1977;1:385-401.

38 Kempen GI, Yardley L, van Haastregt JC, et al. The Short FES-I: a shortened version of the falls efficacy scale-international to assess fear of falling. *Age Ageing* 2008;37(1):45-50.

39 Yardley L, Beyer N, Hauer K, et al. Development and initial validation of the Falls Efficacy Scale-International (FES-I). *Age Ageing* 2005;34(6):614-9.

40 Guralnik JM, Simonsick EM, Ferrucci L, et al. A short physical performance battery assessing lower extremity function: association with self-reported disability and prediction of mortality and nursing

1  
2  
3  
4 home admission. *J Gerontol* 1994;49(2):M85-94.

5 41 Coppin AK, Shumway-Cook A, Saczynski JS, et al. Association of executive function and performance  
6 of dual-task physical tests among older adults: analyses from the InChianti study. *Age Ageing*  
7 2006;35(6):619-24.

8 42 Balasubramanian CK. The community balance and mobility scale alleviates the ceiling effects  
9 observed in the currently used gait and balance assessments for the community-dwelling older adults. *J*  
10 *Geriatr Phys Ther* 2015;38(2):78-89.

11 43 Tacconi C, Mellone S, Chiari L. UADL: A smartphone application for ubiquitous activity of daily living  
12 monitoring with real-time parameter computation [Presentation at the 2015 World Congress of the  
13 International Society of Posture and Gait Research, Sevilla, Spain]. In press 2015.

14 44 EuroQol Group. EuroQol - a new facility for the measurement of health-related quality of life *Health*  
15 *Policy* 1990;16(3):199-208.

16 45 Ware J, Jr., Kosinski M, Keller SD. A 12-Item Short-Form Health Survey: construction of scales and  
17 preliminary tests of reliability and validity. *Med Care* 1996;34(3):220-33.

18 46 Newman-Beinart NA, Norton S, Dowling D, et al. The development and initial psychometric  
19 evaluation of a measure assessing adherence to prescribed exercise: the Exercise Adherence Rating  
20 Scale (EARS). *Physiotherapy* 2017;103(2):180-5.

21 47 Gardner B, Abraham C, Lally P, et al. Towards parsimony in habit measurement: testing the  
22 convergent and predictive validity of an automaticity subscale of the Self-Report Habit Index. *Int J Behav*  
23 *Nutr Act* 2012;9:102.

24 48 Schwarzer R, Luszczynska A. Predicting Health Behaviours. Health Action Process Approach. In M.  
25 Conner PNE, & P. Norman, Eds. Maidenhead, UK: McGraw Hill Open University Press 2015.

26 49 Brooke J. A quick and dirty usability scale. *Usability evaluation in industry* 1996;189(194):4-7.

27 50 Chiari L, van Lummel R, Becker C, et al. Deliverable 2.2: Classification of the user's needs,  
28 characteristics and scenarios - update. 2009.

29 51 PreventIT consortium. Feasibility of the adapted LiFE (aLiFE) intervention – a pilot study. ISRCTN  
30 registration: <http://www.isrctn.com/ISRCTN377506052016>

31 52 Stiggelbout M, Hopman-Rock M, Crone M, et al. Predicting older adults' maintenance in exercise  
32 participation using an integrated social psychological model. *Health Educ Res* 2006;21(1):1-14.

33 53 Prochaska JO, DiClemente CC. Stages and processes of self-change of smoking: toward an integrative  
34 model of change. *J Consult Clin Psychol* 1983;51(3):390-5.

35 54 WHO. Global recommendations on physical activity for health. 2010 ISBN: 9789241599979 Available  
36 online: [http://apps.who.int/iris/bitstream/10665/44399/1/9789241599979\\_eng.pdf](http://apps.who.int/iris/bitstream/10665/44399/1/9789241599979_eng.pdf) (accessed 15 Jan  
37 2017).

38 55 Schulz KF, Altman DG, Moher D, et al. CONSORT 2010 statement: updated guidelines for reporting  
39 parallel group randomised trials. *BMJ* 2010;340:c332.

40 56 Weber M, Belala N, Clemson L, et al. Feasibility and Effectiveness of Intervention Programmes  
41 Integrating Functional Exercise into Daily Life of Older Adults: A Systematic Review. *Gerontology*  
42 2018;64(2):172-187.



## Figure legends

**Figure 1.** The architecture of the eLiFE system. Physical behaviour is continuously monitored by a smartphone and a smartwatch, connected through a Blue-tooth. The same units are also used for delivering the intervention. Data are calculated and stored locally on the smartphone and then sent to a cloud-based server for further processing and storing. The collected information is sent back to the smartphones in the form of motivational messages and feedback on behaviour.

**Figure 2.** PreventIT Flow Diagram

For peer review only



Figure 1. The architecture of the eLiFE system. Physical behaviour is continuously monitored by a smartphone and a smartwatch, connected through a Blue-tooth. The same units are also used for delivering the intervention. Data are calculated and stored locally on the smartphone and then sent to a cloud-based server for further processing and storing. The collected information is sent back to the smartphones in the form of motivational messages and feedback on behaviour.

175x163mm (300 x 300 DPI)

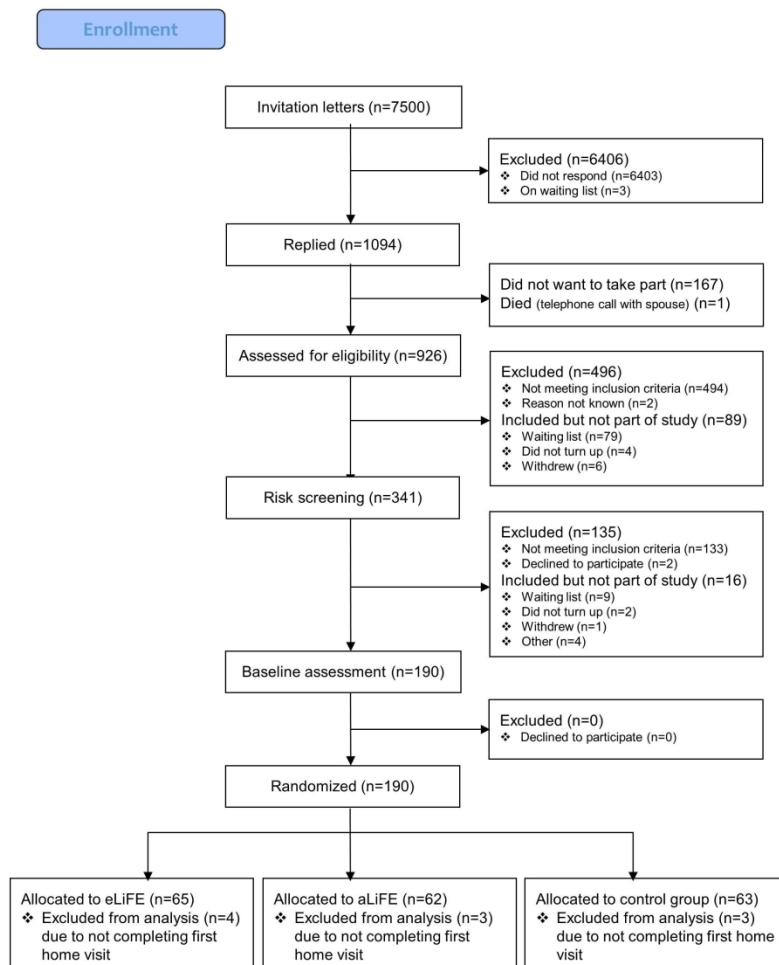

Figure 2. PreventIT Flow Chart

180x260mm (300 x 300 DPI)
